# Supplementary material for: Chemical constituents and biological activities of endophytic fungi from Fagopyrum dibotrys
Source: PeerJ. 2024 Nov 18;12:e18529. doi: 10.7717/peerj.18529 (PMC11580677; doi:10.7717/peerj.18529)
Supplement: Supplemental Information 2 [file peerj-12-18529-s002.xlsx]

## Sheet: Positive mode raw data
id	MS2.name	MS2.ppm	MS2.score	KEGG.ID	Monoisotopic.Molecular.Weight	RT.[min]	Formula	Molecular.Weight	m/z	Reference Ion	1	50	a	C5	C9	C10	C18	J2
1237	Phloroglucinol	-3.27	36.8	C02183	126.032	0.804	C6 H6 O3	126.031	127.039	[M+H]	1.54229e+06	2.29389e+06	665504	2.00841e+06	1.98365e+06	1.70266e+06	1.70565e+06	9.35989e+06
2706	Apocynin	-4.93	35.6	C11380	166.063	5.591	C9 H10 O3	166.062	167.069	[M+H]	1.42029e+06	344488	1.05772e+06	203166	1.95054e+06	1.03001e+06	9.09397e+06	5.05075e+07
2711	Apocynin	-4.59	39.8	C11380	166.063	5.188	C9 H10 O3	166.062	167.07	[M+H]	922419	5.674e+06	6.4658e+06	697851	1.15301e+06	1.65254e+06	254436	212970
1707	Beta-orcinol	-4.58	26.4		138.068	5.188	C8 H10 O2	138.067	139.075	[M+H]	3.42356e+06	1.01307e+07	1.24635e+07	2.2131e+06	3.5785e+06	4.33172e+06	2.86406e+06	1.55645e+06
3233	Epinephrine	-4.68	39.7		183.09	5.608	C9 H13 N O3	183.089	184.096	[M+H]	108359	17228	28817.1	30061.5	23312.7	22316.6	25703.9	1.15869e+08
683	Hydroquinone	-1.66	61.9		110.037	5.638	C6 H6 O2	110.037	111.044	[M+H]	1.30076e+07	2.10054e+07	2.21877e+07	1.87284e+07	2.09599e+07	2.14157e+07	2.04743e+07	3.94894e+07
1179	Orcinol	-4.84	34.8		124.052	6.617	C7 H8 O2	124.052	125.059	[M+H]	2.49599e+06	2.65327e+06	5.2249e+06	2.68264e+06	2.32035e+06	2.33789e+06	2.76876e+06	8.57786e+08
755	1,3 Cyclohexanedione	-1.38	55.3		112.052	5.508	C6 H8 O2	112.052	113.06	[M+H]	1.43541e+06	1.8517e+06	1.48281e+06	1.65864e+06	1.04196e+07	7.00749e+06	2.2284e+06	4.5159e+06
6727	1,4-bis(p-tolylamino)anthraquinone	-4.35	74		418.168	5.335	C28 H22 N2 O2	418.166	419.174	[M+H]	50854.1	38165.7	53134.5	118704	45716.5	48353.4	48508.4	6.63914e+07
6729	1,4-bis(p-tolylamino)anthraquinone	-3.33	63.8		418.168	5.098	C28 H22 N2 O2	418.167	419.174	[M+H]	33163.4	29827.9	43162.6	41011.5	44848.8	48647	42677.7	4.922e+06
6730	1,4-bis(p-tolylamino)anthraquinone	2.94	79.4		418.168	5.139	C28 H22 N2 O2	418.169	419.177	[M+H]	14663.4	1.86557e+06	773738	18458.7	20185.8	21895.3	17068.9	1.9312e+06
3980	1-acetyl beta carboline	-4.89	82.5		210.079	8.242	C13 H10 N2 O	210.078	211.086	[M+H]	2.52551e+07	1.20926e+07	2.27937e+07	2.38767e+07	2.23031e+07	2.43155e+07	2.35691e+07	1.69696e+07
7080	1-O-Hexadecyl-sn-glycero-3-phosphocholine	-5.68	92.6		481.353	10.713	C24 H52 N O6 P	481.35	482.358	[M+H]	1.82654e+06	549721	1.85945e+06	1.28739e+07	1.40764e+06	556697	202684	1.92736e+06
1573	2-Aminoacetophenone	-4.78	69.7		135.068	3.353	C8 H9 N O	135.068	136.075	[M+H]	2.61924e+06	1.4356e+06	2.32371e+07	2.08083e+06	4.74104e+06	1.57696e+06	1.94882e+06	3.38823e+06
1578	2-Aminoacetophenone	-4.54	27.1		135.068	3.694	C8 H9 N O	135.068	136.075	[M+H]	2.86515e+06	2.46037e+06	1.21979e+06	3.04964e+06	2.16522e+06	4.71366e+06	2.58894e+06	2.62088e+06
1221	2-Aminoethylphosphonic acid	-6.03	44.4		125.024	3.669	C2 H8 N O3 P	125.023	126.031	[M+H]	1.44004e+06	12012.9	1.05481e+06	238985	14524.5	180580	86816.8	12005.4
654	2-Aminophenol	-2.35	95.7		109.053	3.846	C6 H7 N O	109.053	110.06	[M+H]	6.37739e+06	2.4654e+06	2.12614e+10	5.37984e+06	5.79746e+06	1.54768e+07	5.49754e+06	1.49067e+08
663	2-Aminophenol	-1.46	84.9		109.053	3.451	C6 H7 N O	109.053	110.06	[M+H]	4.63422e+06	3.55662e+06	1.91172e+07	3.56777e+06	4.72238e+06	4.44343e+06	9.33029e+06	9.48521e+06
921	2-HYDROXY-2-METHYLBUTYRIC ACID	-4.56	27.7		118.063	9.136	C5 H10 O3	118.062	119.07	[M+H]	3.13326e+06	1.17659e+06	1.24373e+06	95293	94931.4	218940	735958	82588
923	2-HYDROXY-2-METHYLBUTYRIC ACID	4.68	28		118.063	9.207	C5 H10 O3	118.064	119.071	[M+H]	1.31683e+06	427603	737466	104557	355719	2.71507e+06	1.51949e+06	86869
2178	2-hydroxybenzothiazole	-4.87	40		151.009	4.757	C7 H5 N O S	151.008	152.016	[M+H]	2.71576e+06	2.37056e+06	4.95268e+06	5.7813e+06	2.90948e+06	2.71118e+06	5.59976e+06	6.08406e+06
2181	2-Hydroxybenzothiazole	-4.65	52.2		151.009	4.93	C7 H5 N O S	151.008	152.016	[M+H]	6.43706e+06	6.05121e+06	2.84071e+06	3.63501e+06	2.52163e+06	3.27621e+06	4.6768e+06	2.73699e+06
1754	2-Methoxyresorcinol	-4.54	48.3		140.047	5.443	C7 H8 O3	140.047	141.054	[M+H]	406829	794806	2.95122e+06	55724	181453	104166	778876	300740
2438	2-methylquinolin-8-ol	-4.85	87.2		159.068	4.004	C10 H9 N O	159.068	160.075	[M+H]	2.74085e+06	1.9451e+06	3.7247e+06	3.07187e+06	2.38771e+06	2.34782e+06	2.42551e+06	8.76162e+06
2439	2-methylquinolin-8-ol	-4.81	91.9		159.068	4.325	C10 H9 N O	159.068	160.075	[M+H]	2.17531e+06	2.36963e+06	9.15087e+06	3.6932e+06	1.84087e+06	2.33289e+06	4.23569e+06	5.65619e+07
2444	2-methylquinolin-8-ol	-4.52	78.9		159.068	4.491	C10 H9 N O	159.068	160.075	[M+H]	1.52159e+06	2.61985e+06	3.51172e+06	3.19596e+06	4.00742e+06	4.82942e+06	2.68666e+06	7.01654e+06
2846	2-naphthoic acid	-4.25	55.8		172.052	5.506	C11 H8 O2	172.052	173.059	[M+H]	7.08928e+06	263493	540332	420120	295538	643769	61969.3	63343.8
1477	2-Oxindole	-5.16	97.5	C12312	133.053	0.866	C8 H7 N O	133.052	134.059	[M+H]	5.10486e+07	1.4855e+07	3.25266e+07	2.3373e+07	3.50816e+07	4.00598e+07	2.62591e+07	1.94805e+07
1482	2-Oxindole	-4.31	83	C12312	133.053	1.347	C8 H7 N O	133.052	134.059	[M+H]	9.91939e+06	8.10438e+06	2.49439e+07	1.41055e+07	2.36462e+07	2.63271e+07	1.68685e+07	1.69543e+07
1571	2-Phenylacetamide	-5.61	63.7		135.068	0.867	C8 H9 N O	135.068	136.075	[M+H]	3.89514e+06	5.9463e+06	1.05097e+07	6.34392e+06	4.44967e+06	4.596e+06	4.09736e+06	4.09582e+06
168	2-Pyrrolidinone	2.08	86.1		85.0528	3.652	C4 H7 N O	85.0529	86.0602	[M+H]	1.19924e+07	1.08186e+06	2.38828e+06	2.43206e+06	1.05029e+06	1.37984e+06	1.81113e+06	1.31213e+06
169	2-Pyrrolidinone	2.33	90.5		85.0528	4.145	C4 H7 N O	85.053	86.0602	[M+H]	8.27134e+06	643165	4.55844e+06	5.94669e+06	2.27204e+06	2.4194e+06	1.65128e+07	3.63117e+06
172	2-Pyrrolidinone	2.46	75.3		85.0528	3.944	C4 H7 N O	85.053	86.0602	[M+H]	1.41011e+06	716223	859816	2.29537e+06	1.14385e+07	6.62321e+06	1.04973e+06	923144
2434	3-Acetylindole	-5.32	41.1		159.068	6.818	C10 H9 N O	159.068	160.075	[M+H]	783328	1.69425e+06	615144	9.41487e+06	2.05457e+06	2.2633e+06	1.69906e+06	8.72434e+06
2443	3-Acetylindole	-4.65	41.1		159.068	6.961	C10 H9 N O	159.068	160.075	[M+H]	1.74283e+06	1.12738e+06	1.9826e+06	1.27192e+07	2.05457e+06	1.37318e+06	1.69906e+06	3.20493e+06
662	3-Aminophenol	-1.48	99.7		109.053	1.476	C6 H7 N O	109.053	110.06	[M+H]	6.20095e+07	2.23289e+07	6.19253e+07	2.68713e+07	4.45421e+07	5.98747e+07	4.37579e+07	4.66289e+07
667	3-Aminophenol	-1.35	78.9		109.053	1.723	C6 H7 N O	109.053	110.06	[M+H]	1.02824e+07	2.10482e+07	8.39868e+06	1.08402e+07	1.22519e+07	1.47031e+07	1.35296e+07	1.77579e+07
737	3-FUROIC ACID	-2.77	23.6		112.016	6.575	C5 H4 O3	112.016	113.023	[M+H]	50711.8	77468.9	93134.9	50901.4	58279.1	80143	169948	6.71803e+07
738	3-FUROIC ACID	-2.43	25.3		112.016	6.665	C5 H4 O3	112.016	113.023	[M+H]	40333.7	164413	210371	57435.7	68089.6	52715.3	333571	6.42352e+07
2290	3-Hydroxyanthranilic acid	-5.01	51.1	C00632	153.043	2.78	C7 H7 N O3	153.042	154.049	[M+H]	138595	41901	28327.3	269765	208380	115844	562318	5.03206e+06
1091	3-Hydroxybenzaldehyde	-4.1	45.1		122.037	10.793	C7 H6 O2	122.036	123.044	[M+H]	1.69278e+06	939886	3.72916e+06	2.74299e+06	2.20152e+06	1.24509e+06	6.13823e+06	987091
1696	3-HYDROXYBENZOIC ACID	-4.47	21.2		138.032	4.861	C7 H6 O3	138.031	139.038	[M+H]	901836	792769	895401	1.38709e+06	1.34307e+06	1.39315e+06	1.50272e+06	1.49404e+06
1726	3-Hydroxypicolinic acid	-4.57	96.6	C18620	139.027	1.798	C6 H5 N O3	139.026	140.034	[M+H]	194033	40541.5	39157	183370	38999.3	38798.2	135669	4.01169e+06
1188	3-METHYLCATECHOL	-2.94	74.8		124.052	3.816	C7 H8 O2	124.052	125.059	[M+H]	2.22441e+06	1.90321e+06	1.76153e+06	2.45898e+06	2.45106e+06	2.31894e+06	2.24795e+06	1.47171e+07
2790	3-Methylhistidine	19.16	92.5	C01152	169.085	6.409	C7 H11 N3 O2	169.088	170.096	[M+H]	2.42511e+06	2.28652e+06	2.31015e+06	8.48084e+06	2.6692e+06	2.60089e+06	2.23091e+06	2.30635e+06
1982	3-Methyloxyindole	-4.4	11.4		147.068	5.29	C9 H9 N O	147.068	148.075	[M+H]	784712	880686	889295	1.10083e+06	1.32081e+06	1.13171e+06	857451	2.90426e+06
1983	3-Methyloxyindole	-4.33	12.1		147.068	5.055	C9 H9 N O	147.068	148.075	[M+H]	2.64291e+06	1.82521e+07	2.43926e+06	2.03467e+06	2.17592e+06	2.64272e+06	3.40423e+06	3.00591e+06
1984	3-Methyloxyindole	-4.2	13.4		147.068	4.85	C9 H9 N O	147.068	148.075	[M+H]	1.77494e+06	705949	2.11978e+06	1.07023e+06	2.17592e+06	1.08903e+06	896762	888612
1366	4-Acetylbutyric acid	16.83	46.8		130.063	6.473	C6 H10 O3	130.065	131.072	[M+H]	1.05504e+06	293567	1.01918e+06	2.20026e+06	300751	466788	1.74198e+06	643987
451	4-AMINOBUTANOATE	-0.75	73.1		103.063	7.541	C4 H9 N O2	103.063	104.071	[M+H]	3.64729e+06	3.68899e+06	1.53769e+06	2.09054e+06	2.99303e+06	3.21733e+06	2.69496e+06	1.82681e+06
656	4-Aminophenol	-2.18	84.3		109.053	4.594	C6 H7 N O	109.053	110.06	[M+H]	4.196e+07	3.10546e+06	1.90722e+08	6.3735e+06	3.50014e+06	1.76485e+07	7.27014e+06	7.08261e+06
1236	4-Hydroxy-6-methyl-2-pyrone	-3.54	57.4	C02752	126.032	3.84	C6 H6 O3	126.031	127.039	[M+H]	1.31737e+06	1.5038e+06	2.12787e+06	797929	1.248e+06	1.32075e+06	1.93431e+06	797668
1100	4-Hydroxybenzaldehyde	-3	86.3	C00633	122.037	3.454	C7 H6 O2	122.036	123.044	[M+H]	4.25928e+06	1.1058e+06	1.59204e+06	3.12171e+06	1.33649e+06	1.53777e+06	2.18869e+06	2.15102e+06
1105	4-Hydroxybenzaldehyde	-2.72	36.8		122.037	3.725	C7 H6 O2	122.036	123.044	[M+H]	1.22009e+06	1.34995e+06	1.08617e+06	1.02357e+06	1.78385e+06	2.18307e+06	1.11578e+06	1.12112e+07
1693	4-Hydroxybenzoic acid	-5.3	33.1		138.032	6.575	C7 H6 O3	138.031	139.038	[M+H]	374733	2.07182e+06	2.01772e+06	904334	340542	330963	2.99423e+06	5.27649e+08
1694	4-Hydroxybenzoic acid	-5.08	48.1	C00156	138.032	6.669	C7 H6 O3	138.031	139.038	[M+H]	899566	2.07182e+06	2.01772e+06	904334	625316	838883	1.0497e+06	6.76926e+08
1487	4-Hydroxyindole	-4.08	90.4	C12312	133.053	3.774	C8 H7 N O	133.052	134.06	[M+H]	3.79779e+06	7.16604e+06	2.45605e+06	9.91854e+06	8.2254e+06	9.85426e+06	1.44352e+07	9.10283e+06
2081	4-Hydroxymandelonitrile	-5.06	13.5		149.048	3.495	C8 H7 N O2	149.047	150.054	[M+H]	2.12309e+06	1.01281e+06	1.04592e+06	3.12657e+06	883357	1.56018e+06	1.94622e+06	808073
2085	4-Hydroxymandelonitrile	-4.93	19.9		149.048	3.667	C8 H7 N O2	149.047	150.054	[M+H]	924778	410547	1.04592e+06	2.71167e+06	353403	842683	629835	204670
1154	4-Methoxyaniline	-3.09	63.1		123.068	2.179	C7 H9 N O	123.068	124.075	[M+H]	1.76513e+06	1.38178e+06	2.72208e+07	1.25271e+06	1.44455e+06	1.79962e+06	1.8141e+06	1.81456e+06
1155	4-Methoxyaniline	-2.95	54.7		123.068	2.609	C7 H9 N O	123.068	124.075	[M+H]	4.08106e+06	3.09483e+06	1.00404e+07	3.48282e+06	4.64866e+06	4.89142e+06	3.5206e+06	4.34361e+06
1828	4-Methyl-5-thiazoleethanol	-4.42	97.9	C04294	143.04	2.746	C6 H9 N O S	143.04	144.047	[M+H]	1.93876e+06	4.94172e+06	4.91233e+06	1.70918e+06	6.10537e+06	1.9636e+07	1.11826e+06	7.96988e+06
1725	4-NITROPHENOL	-5.29	36.1		139.027	6.586	C6 H5 N O3	139.026	140.033	[M+H]	29504.7	25301.6	34180.5	48264.4	55259.8	40373.5	34658.2	1.2404e+07
2625	4-Phenylbutyric acid	-5.22	88.7		164.084	7.753	C10 H12 O2	164.083	165.09	[M+H]	2.43451e+07	1.36167e+06	2.04344e+07	5.52846e+06	1.40249e+07	3.2458e+07	1.16594e+07	1.39113e+06
2630	4-Phenylbutyric acid	-4.94	90.9		164.084	7.907	C10 H12 O2	164.083	165.09	[M+H]	1.79428e+08	7.42078e+06	1.37295e+08	2.84825e+07	6.15689e+07	1.26226e+08	7.08412e+07	1.14128e+07
1490	5-Hydroxyindole	-3.88	66.7		133.053	3.238	C8 H7 N O	133.052	134.06	[M+H]	5.72868e+06	4.50648e+06	6.56681e+06	6.05015e+06	6.2533e+06	6.58612e+06	7.86821e+06	5.29886e+06
3467	5-Hydroxyindole-3-acetic acid	-4.64	48.3	C05635	191.058	4.876	C10 H9 N O3	191.057	192.065	[M+H]	756048	9.05284e+06	6.85994e+06	480095	125824	167222	83505.7	145271
2545	5-Hydroxylysine	19.87	36.9		162.1	5.303	C6 H14 N2 O3	162.104	163.111	[M+H]	3.93343e+06	1.74552e+06	2.02555e+06	2.47828e+06	4.63777e+06	5.15335e+06	3.84068e+06	3.46675e+06
1806	5-HYDROXYMETHYL-2-FURANCARBOXYLIC ACID	-5.66	29.6		142.027	6.577	C6 H6 O4	142.026	143.033	[M+H]	109162	183526	139162	199507	110515	125218	55671.2	3.34867e+07
3848	5-Methoxyindoleacetic acid	-5.17	56.2	C05660	205.074	4.124	C11 H11 N O3	205.073	206.08	[M+H]	252651	160743	47017	399892	269601	199716	1.36439e+06	138568
3078	5-PHENYLVALERIC ACID	-5.87	46.3		178.099	11.185	C11 H14 O2	178.098	179.106	[M+H]	1.87876e+07	4.49559e+06	4.71151e+06	9.49209e+06	9.11784e+06	7.86797e+06	4.30764e+06	3.21779e+06
1838	6-Methylquinoline	-4.45	85.5		143.073	3.958	C10 H9 N	143.073	144.08	[M+H]	1.04947e+07	1.05973e+07	1.34918e+07	1.41338e+07	4.68883e+06	1.3528e+07	1.62764e+07	1.09639e+07
1842	6-Methylquinoline	-4.12	94.6		143.073	4.434	C10 H9 N	143.073	144.08	[M+H]	5.25549e+06	1.36201e+07	4.638e+06	7.79721e+06	1.49903e+07	1.08382e+07	8.15052e+06	8.20717e+06
2718	6-Pentyl-2H-pyran-2-one	-4.45	49.4		166.099	5.183	C10 H14 O2	166.099	167.106	[M+H]	423501	3.95102e+06	3.71049e+06	502737	481926	473501	1.31482e+06	1.099e+06
4216	7-(2-aminophenyl)heptanoic acid	-4.69	48.4		221.142	8.255	C13 H19 N O2	221.141	222.148	[M+H]	3.28634e+07	2.05357e+06	1.28316e+07	4.90551e+06	4.37948e+06	3.8182e+06	7.62047e+06	574049
4831	7,8-Dihydroneopterin	-9.67	15.3		255.097	6.73	C9 H13 N5 O4	255.094	256.102	[M+H]	53237.3	44218.8	63055.7	221352	140072	108444	88466.8	2.92197e+07
1025	Acetophenone	-3.32	80.4	C07113	120.058	3.993	C8 H8 O	120.057	121.064	[M+H]	1.28555e+08	2.30299e+07	5.39753e+07	9.61505e+07	3.70346e+07	2.20141e+07	4.00703e+07	1.20272e+08
1028	Acetophenone	-2.98	73.9	C07113	120.058	3.842	C8 H8 O	120.057	121.064	[M+H]	5.30195e+06	1.31631e+07	1.27513e+07	7.30026e+06	5.72967e+06	1.19152e+07	5.6163e+06	2.47789e+07
2383	Acetylproline	-4.63	46.8		157.074	8.268	C7 H11 N O3	157.073	158.08	[M+H]	1.38234e+07	639620	7.80839e+06	3.10224e+06	2.45145e+06	459721	3.23199e+06	296346
1566	Adenine	-4.76	98.1	C00147	135.054	1.684	C5 H5 N5	135.054	136.061	[M+H]	1.66122e+07	1.5309e+07	2.12465e+07	5.79244e+06	1.19842e+07	1.45973e+07	2.26438e+06	1.68838e+08
1567	Adenine	-4.69	70.2	C00147	135.054	1.483	C5 H5 N5	135.054	136.061	[M+H]	2.14348e+06	230201	787551	5.77857e+06	255800	192164	610513	1.17315e+07
5062	Adenosine	-5.36	91.2	C00212	267.097	1.687	C10 H13 N5 O4	267.095	268.103	[M+H]	256714	284901	255737	78800.5	169182	280291	28968.4	3.39921e+06
1935	ADIPATE	-4.82	14.3		146.058	9.207	C6 H10 O4	146.057	147.064	[M+H]	2.26159e+07	2.03864e+07	2.16821e+07	2.50385e+07	2.1005e+07	1.95022e+07	2.15232e+07	2.38298e+07
273	Aniline	-0.34	32.8		93.0579	3.819	C6 H7 N	93.0578	94.0651	[M+H]	6.15818e+06	5.20035e+06	7.68395e+07	7.17201e+06	6.44694e+06	5.92964e+06	5.19004e+06	9.45731e+06
277	Aniline	1.08	83.4		93.0579	4.121	C6 H7 N	93.058	94.0652	[M+H]	1.11085e+07	9.54098e+06	8.26238e+06	1.19934e+07	5.58625e+06	6.40594e+06	5.44256e+06	2.04146e+07
4613	Anserine	-9.8	18		240.122	7.093	C10 H16 N4 O3	240.12	241.127	[M+H]	69620.2	37084.6	60736.6	69853.1	1.03199e+06	2.96147e+06	58688	52706.4
5612	Arachidonic acid	-6.38	86.2	C00219	304.24	10.781	C20 H32 O2	304.238	305.246	[M+H]	1.32886e+07	2.34128e+06	2.19668e+07	2.74744e+07	1.71128e+07	4.36542e+06	5.15858e+07	551131
7623	Beauvericin	-9.43	92.9		783.409	12.89	C45 H57 N3 O9	783.402	784.41	[M+H]	1.50139e+07	178543	34999.7	38318.6	50624.1	47383.2	7.79277e+08	31238
7624	Beauvericin	-9.37	92.4		783.409	13.201	C45 H57 N3 O9	783.402	784.409	[M+H]	2.88296e+08	1.73274e+08	5.84552e+07	1.50159e+08	1.89468e+07	4.08834e+06	3.68832e+08	1.66315e+07
7625	Beauvericin	-9.24	91.5		783.409	12.768	C45 H57 N3 O9	783.402	784.41	[M+H]	353462	100437	11456.4	16416.8	18664.3	18324.5	3.76013e+08	10370.2
7626	Beauvericin	-9.22	94.6		783.409	13.057	C45 H57 N3 O9	783.402	784.41	[M+H]	5.44125e+08	1.7426e+08	5.87424e+07	1.52461e+08	1.90685e+07	4.04931e+06	6.92573e+08	1.66225e+07
1066	Benzamide	-3.75	39.5		121.053	3.991	C7 H7 N O	121.052	122.06	[M+H]	4.83104e+06	3.61381e+06	1.39446e+07	4.61514e+06	4.48397e+06	4.08359e+06	3.85552e+06	3.88384e+06
1096	Benzoic acid	-3.39	62.3		122.037	4.652	C7 H6 O2	122.036	123.044	[M+H]	1.55782e+06	1.83793e+06	2.03036e+06	3.11222e+06	3.12922e+06	4.25984e+06	2.27902e+06	6.76474e+06
628	BENZYL ALCOHOL	-1.01	84.7		108.058	2.975	C7 H8 O	108.057	109.065	[M+H]	7.07045e+06	7.36612e+06	1.54267e+07	7.80227e+06	7.57367e+06	8.15993e+06	7.97299e+06	7.32546e+06
629	BENZYL ALCOHOL	-0.94	82.2		108.058	3.314	C7 H8 O	108.057	109.065	[M+H]	7.67177e+06	7.4333e+06	7.62303e+06	1.13331e+07	1.39054e+07	1.48805e+07	1.18343e+07	1.65291e+07
884	Betaine	-2.85	99.1	C00719	117.079	0.812	C5 H11 N O2	117.079	118.086	[M+H]	4.98112e+07	1.74113e+07	6.75243e+07	3.38854e+08	7.05421e+06	3.26732e+06	2.04284e+07	8.66798e+07
3565	Caffeine	16.1	97.8	C07481	194.08	4.099	C8 H10 N4 O2	194.083	195.091	[M+H]	1.41695e+06	804559	1.57168e+06	2.12331e+06	2.47765e+06	4.45731e+06	1.8886e+06	784442
3566	Caffeine	16.24	98.2	C07481	194.08	4.34	C8 H10 N4 O2	194.084	195.091	[M+H]	2.25743e+07	1.232e+07	2.79848e+07	4.90901e+07	4.23467e+07	6.40061e+07	2.99801e+07	2.65827e+07
460	Choline	-0.72	97.6	C00114	103.1	0.755	C5 H13 N O	103.1	104.107	[M+H]	4.23739e+07	3.33581e+07	4.52195e+07	7.96132e+07	3.54528e+07	3.403e+07	3.8042e+07	4.52477e+07
2034	Cinnamic acid	-5.76	42.4		148.052	3.817	C9 H8 O2	148.052	149.059	[M+H]	1.4186e+06	1.08499e+06	1.99807e+06	1.46343e+06	1.35559e+06	1.22297e+06	1.19939e+06	2.00081e+06
2038	Cinnamic acid	-5.46	40.9		148.052	4.133	C9 H8 O2	148.052	149.059	[M+H]	1.22008e+06	2.15087e+06	1.66013e+06	1.20847e+06	1.22209e+06	1.34141e+06	4.56593e+06	4.06927e+06
2266	Citral	-5.79	85.2	C01499	152.12	13.649	C10 H16 O	152.119	153.127	[M+H]	1.23347e+07	1.07797e+07	8.43705e+06	1.08862e+06	1.16142e+07	8.05609e+06	6.1142e+06	1.37776e+07
5769	Coenzyme Q2	6.95	85.8	C00399	318.183	10.617	C19 H26 O4	318.185	319.193	[M+H]	1.15826e+08	1.21681e+08	1.12289e+08	1.06132e+08	1.15516e+08	1.14807e+08	1.07514e+08	9.69119e+07
196	Crotonic acid	1.99	51.9	C01771	86.0368	0.79	C4 H6 O2	86.037	87.0442	[M+H]	851317	1.41628e+06	3.565e+06	2.0212e+06	955738	725425	4.14851e+06	3.68757e+06
195	DIACETYL	1.91	29.7		86.0368	4.146	C4 H6 O2	86.0369	87.0442	[M+H]	2.74653e+06	1.67445e+06	2.92515e+06	2.10979e+07	2.01029e+06	2.16867e+06	3.15843e+06	1.05244e+06
3685	DICTAMNINE	-4.77	22.6		199.063	4.93	C12 H9 N O2	199.062	200.07	[M+H]	1.08605e+06	44086.4	270006	308536	58721.2	316504	120070	134201
3686	DICTAMNINE	-4.68	77.1		199.063	4.588	C12 H9 N O2	199.062	200.07	[M+H]	548934	123529	316338	2.74869e+06	1.72885e+06	1.70254e+06	1.07017e+06	280788
520	DIETHANOLAMINE	-0.9	73.3		105.079	5.303	C4 H11 N O2	105.079	106.086	[M+H]	1.27578e+07	1.037e+07	1.37261e+07	9.71299e+06	8.72094e+06	1.13112e+07	1.5402e+07	1.04376e+07
57	Dimethyl sulfoxide	2.95	96.9		78.0139	0.881	C2 H6 O S	78.0142	79.0214	[M+H]	4.28177e+09	4.00112e+09	3.857e+09	6.22274e+09	5.21703e+09	4.81606e+09	4.67873e+09	3.31637e+09
58	Dimethyl sulfoxide	3.33	97.1		78.0139	1.294	C2 H6 O S	78.0142	79.0215	[M+H]	1.31919e+09	1.28949e+09	1.2064e+09	1.79198e+09	1.66801e+09	1.53082e+09	1.38225e+09	1.02112e+09
7557	DL-Dipalmitoylphosphatidylcholine	-6.56	94.7		733.562	14.467	C40 H80 N O8 P	733.557	734.564	[M+H]	1.90548e+06	1.7112e+06	1.37124e+06	1.40344e+06	2.49216e+06	3.04245e+06	2.35798e+06	1.73977e+06
3232	DL-NORMETANEPHRINE	-5.01	23.7		183.09	10.143	C9 H13 N O3	183.089	184.096	[M+H]	3.23656e+06	204567	3.19586e+06	1.22419e+07	3.22546e+06	1.31964e+06	5.74064e+06	278257
5982	Docosatrienoic acid	-5.72	58.6		334.287	12.541	C22 H38 O2	334.285	335.293	[M+H]	1.1958e+06	788846	1.82423e+06	973282	878088	595779	1.13732e+06	825464
2299	Dopamine	-4.85	35.6	C03758	153.079	1.384	C8 H11 N O2	153.078	154.086	[M+H]	859879	3.43298e+06	2.66588e+06	2.52886e+06	1.94071e+06	1.69528e+06	1.90543e+06	771483
1334	D-Pipecolinic acid	-3.71	40.5		129.079	0.709	C6 H11 N O2	129.078	130.086	[M+H]	491961	403519	357065	1.60917e+06	491852	383657	328285	1.36492e+06
6007	Erucamide	-9.41	90.4		337.334	13.651	C22 H43 N O	337.331	338.339	[M+H]	2.53448e+08	2.95706e+08	2.31252e+08	6.47372e+06	3.37694e+08	1.92801e+08	1.27226e+08	3.11342e+08
6008	Erucamide	-5.82	78.1		337.334	14.014	C22 H43 N O	337.332	338.34	[M+H]	5.6328e+06	3.2479e+06	6.69761e+06	4.87885e+06	6.38478e+06	3.4576e+06	2.6531e+06	7.52773e+06
6010	Erucamide	-5.63	66		337.334	14.095	C22 H43 N O	337.333	338.34	[M+H]	4.08634e+06	5.327e+06	4.57712e+06	1.67007e+06	4.88753e+06	3.00863e+06	2.6531e+06	7.0971e+06
1434	Ethyl malonate	16.6	45.3		132.042	5.712	C5 H8 O4	132.044	133.052	[M+H]	502543	333740	873390	691283	420197	705021	1.50959e+06	4.39455e+06
4866	Ethyl myristate	-6.2	68.7		256.24	12.181	C16 H32 O2	256.239	257.246	[M+H]	4.19325e+06	4.62352e+06	5.26812e+06	8.95215e+06	7.97567e+06	1.129e+07	8.43154e+06	7.39027e+06
2948	Guanidinosuccinic acid	18.53	86.5	C03139	175.059	4.038	C5 H9 N3 O4	175.063	176.07	[M+H]	3.6593e+06	2.86296e+06	2.19097e+06	744343	2.4342e+06	2.39072e+06	693819	388436
2186	Guanine	-4.65	88.1	C00242	151.049	1.641	C5 H5 N5 O	151.049	152.056	[M+H]	130343	151369	261386	29145.7	111999	100796	24811.9	6.69295e+06
3211	Harmane	-4.31	95.2		182.084	4.314	C12 H10 N2	182.084	183.091	[M+H]	2.56714e+06	1.0411e+06	1.00833e+07	6.21064e+06	4.78111e+06	1.2331e+07	2.9896e+06	2.9473e+06
4838	Hexadecanamide	-6.15	95.2		255.256	13.106	C16 H33 N O	255.255	256.262	[M+H]	695150	1.12928e+06	1.20502e+06	1.66646e+06	1.32459e+06	1.15269e+06	762969	1.40743e+06
4839	Hexadecanamide	-6.06	92.4		255.256	12.835	C16 H33 N O	255.255	256.262	[M+H]	6.87704e+06	5.80493e+06	6.73781e+06	6.0822e+06	6.51611e+06	5.53675e+06	2.91881e+06	6.75246e+06
1603	Hypoxanthine	-5.48	59.6	C00262	136.039	0.87	C5 H4 N4 O	136.038	137.045	[M+H]	4.94035e+06	1.03311e+06	6.40796e+06	3.47665e+07	513591	181847	1.25834e+06	5.60739e+06
1604	Hypoxanthine	-5.41	98	C00262	136.039	1.296	C5 H4 N4 O	136.038	137.045	[M+H]	4.05973e+06	901723	5.84772e+06	2.58603e+07	531223	108619	1.00592e+06	4.85484e+06
877	Indole	-2.41	97.6	C00463	117.058	5.535	C8 H7 N	117.058	118.065	[M+H]	2.46191e+07	1.04487e+07	4.17048e+07	5.48495e+07	3.9898e+07	4.28586e+07	2.15279e+07	2.45341e+07
881	Indole	-2.13	93.2	C00463	117.058	5.1	C8 H7 N	117.058	118.065	[M+H]	1.38352e+07	2.0778e+07	1.54309e+07	1.35753e+07	1.2646e+07	1.44267e+07	1.25126e+07	1.4291e+07
2946	Indole-3-acetic acid	-5.04	98.8	C00954	175.063	5.766	C10 H9 N O2	175.062	176.07	[M+H]	4.44595e+06	314857	2.04558e+06	561336	636883	2.20379e+06	7.52e+06	975334
3788	Indole-3-butyric acid	-4.43	67.2	C11284	203.095	6.508	C12 H13 N O2	203.094	204.101	[M+H]	566414	135396	6.31652e+06	1.31766e+06	98600.1	65341.1	3.59235e+06	771289
3330	Indoleacrylic acid	-5.32	92.4		187.063	3.281	C11 H9 N O2	187.062	188.07	[M+H]	534261	1.39678e+06	532721	2.51829e+06	616537	388045	411639	3.91115e+06
3332	Indoleacrylic acid	-4.58	57.6		187.063	2.95	C11 H9 N O2	187.062	188.07	[M+H]	5.3985e+06	4.63392e+06	4.85498e+06	1.35311e+06	6.16259e+06	6.6374e+06	2.18441e+06	4.49239e+06
3683	IS_2-CHLORO-PHENYLALANINE	-5.58	85.4		199.04	3.312	C9 H10 Cl N O2	199.039	200.046	[M+H]	3.23306e+07	2.78876e+07	2.64818e+07	3.68542e+07	2.74607e+07	2.906e+07	2.56633e+07	2.5975e+07
1319	Isoquinoline	-4.38	99.9	C06323	129.058	6.83	C9 H7 N	129.057	130.065	[M+H]	2.07417e+07	1.43582e+07	2.59275e+07	3.3007e+08	1.99261e+07	7.74268e+07	2.90292e+07	3.2359e+07
1326	Isoquinoline	-3.79	100	C06323	129.058	6.961	C9 H7 N	129.057	130.065	[M+H]	2.78929e+07	2.2826e+07	2.59275e+07	3.02399e+08	2.72185e+07	7.1308e+07	3.63613e+07	2.89293e+07
3989	Jasmonic acid	-5.69	63.8	C08491	210.126	10.779	C12 H18 O3	210.124	211.132	[M+H]	2.66442e+06	342068	7.87151e+06	1.01902e+07	5.88502e+06	1.10602e+06	1.83252e+07	721269
1807	Kojic acid	-4.39	90.3	C14516	142.027	3.407	C6 H6 O4	142.026	143.033	[M+H]	5.70389e+06	2.28632e+06	1.39219e+07	3.156e+06	4.30719e+06	6.0347e+06	6.56651e+06	1.52111e+07
3321	L-Alanyl-L-proline	17.12	75		186.1	6.113	C8 H14 N2 O3	186.104	187.111	[M+H]	6.2413e+06	5.34362e+06	5.4045e+06	6.35677e+06	3.93549e+06	5.11104e+06	4.50018e+06	5.85688e+06
2927	L-Arginine	18.64	98.3	C00062	174.112	4.318	C6 H14 N4 O2	174.115	175.122	[M+H]	2.7664e+06	856287	4.27652e+06	1.59229e+06	1.02256e+07	1.25107e+07	4.2231e+06	2.21362e+06
2954	L-Citrulline	18.4	40.9	C00327	175.096	4.677	C6 H13 N3 O3	175.099	176.106	[M+H]	3.75438e+06	1.33528e+06	1.75907e+06	2.88724e+06	1.39671e+06	1.09166e+06	1.75001e+06	4.21749e+06
2338	Linalool	-5.28	12.1		154.136	10.553	C10 H18 O	154.135	155.142	[M+H]	1.78434e+06	180981	1.29343e+06	5.20697e+06	868982	1.7109e+06	1.81212e+06	461218
2669	L-Phenylalanine	-4.3	14.8		165.079	4.186	C9 H11 N O2	165.078	166.086	[M+H]	474035	892310	354943	1.21698e+06	506304	371093	124532	713374
1315	L-Pyroglutamic acid	-4	56.8	C01879	129.043	0.833	C5 H7 N O3	129.042	130.049	[M+H]	364698	403716	418298	1.64188e+06	300445	330339	305906	2.15206e+06
897	L-Threonic acid-1,4-lactone	8.23	31.4		118.027	1.296	C4 H6 O4	118.028	119.035	[M+H]	1.08653e+06	155920	1.5534e+06	5.29748e+06	80940.1	74399.1	325201	1.08778e+06
898	L-Threonic acid-1,4-lactone	8.76	30.6		118.027	1.686	C4 H6 O4	118.028	119.035	[M+H]	282515	229990	532387	123996	130290	207291	24917.1	3.04821e+06
4633	lumichrome	-4.82	92.7		242.08	5.39	C12 H10 N4 O2	242.079	243.086	[M+H]	2.59189e+06	1.1164e+06	1.88711e+06	4.17245e+06	4.18151e+06	4.83625e+06	2.37932e+06	1.7748e+06
7131	LysoPC(16:0/0:0)	-5.91	88.4		495.332	10.301	C24 H50 N O7 P	495.33	496.337	[M+H]	5.63662e+07	4.6035e+07	4.44961e+07	2.77985e+08	1.1188e+08	8.27102e+07	6.81336e+07	4.09583e+07
7200	LysoPC(18:1)	-5.75	84.9		521.348	10.638	C26 H52 N O7 P	521.345	522.352	[M+H]	1.23667e+07	1.08801e+07	1.04231e+07	7.37429e+07	3.06662e+07	2.09155e+07	1.56011e+07	1.00468e+07
7196	LysoPC(18:2)	-5.58	84.9		519.332	9.874	C26 H50 N O7 P	519.33	520.337	[M+H]	2.91295e+07	2.41264e+07	2.12707e+07	1.3812e+08	6.62859e+07	4.44325e+07	3.6318e+07	1.8659e+07
7287	LysoPC(20:4)	-5.45	83.7		543.332	9.883	C28 H50 N O7 P	543.33	544.337	[M+H]	6.60873e+06	5.04537e+06	1.56954e+06	3.55083e+07	1.6022e+07	9.84554e+06	7.99954e+06	4.43543e+06
7335	LysoPC(22:6)	-5.98	83.8		567.332	9.855	C30 H50 N O7 P	567.329	568.336	[M+H]	3.51399e+06	2.33869e+06	1.88812e+06	2.43518e+07	1.06726e+07	6.48349e+06	5.0213e+06	2.31927e+06
1233	Maltol	-3.87	91.6	C11918	126.032	3.377	C6 H6 O3	126.031	127.038	[M+H]	1.22572e+06	1.2503e+06	3.77344e+06	1.80066e+06	675518	767074	4.12965e+06	1.63931e+06
1942	Methyl trans-styryl ketone	-5.31	77.6		146.073	7.728	C10 H10 O	146.072	147.08	[M+H]	1.72215e+08	2.76572e+07	1.48843e+08	4.18312e+07	6.89178e+07	1.63042e+08	7.66788e+07	1.89299e+07
1943	Methyl trans-styryl ketone	-5.2	84		146.073	7.919	C10 H10 O	146.072	147.08	[M+H]	1.69918e+08	2.38974e+07	1.4346e+08	3.24509e+07	6.89397e+07	1.27942e+08	6.96658e+07	1.51372e+07
896	Methylmalonic acid	7.95	14.8		118.027	0.865	C4 H6 O4	118.028	119.035	[M+H]	1.95207e+06	325958	2.45418e+06	7.40145e+06	243361	248461	415404	3.48462e+06
3965	MUCIC ACID	-4.35	17.5		210.038	4.682	C6 H10 O8	210.037	211.044	[M+H]	1.66726e+06	14775.6	269492	1.65367e+06	497611	313339	398171	15595.2
2198	N-(2-hydroxyphenyl)acetamide	-4.76	64.6		151.063	4.584	C8 H9 N O2	151.063	152.07	[M+H]	612589	714617	435460	1.19445e+06	910866	533253	1.68863e+06	1.3328e+06
3384	N6,N6,N6-Trimethyl-L-lysine	15.8	52.1	C03793	188.152	10.859	C9 H20 N2 O2	188.155	189.163	[M+H]	9.1992e+06	8.55144e+06	8.23428e+06	6.78387e+07	3.64676e+07	1.55562e+07	2.27667e+07	7.08083e+06
3374	N6-Acetyl-L-lysine	16.42	57	C02727	188.116	4.761	C8 H16 N2 O3	188.119	189.126	[M+H]	4.91799e+06	776743	7.00378e+06	4.70427e+06	4.90533e+06	6.3983e+06	6.309e+06	573999
5985	N6-Isopentenyladenosine	-4.48	91.6		335.159	5.034	C15 H21 N5 O4	335.158	336.165	[M+H]	23563	61932.3	28689.9	19375.8	17769.1	23048.4	15658	5.74912e+06
1382	N-Acetylputrescine	-4.11	34.7	C02714	130.111	4.604	C6 H14 N2 O	130.11	131.117	[M+H]	530577	2.43778e+06	320269	395884	495542	728466	79827.4	183846
1383	N-Acetylputrescine	-3.86	67	C02714	130.111	4.861	C6 H14 N2 O	130.11	131.117	[M+H]	270841	1.91925e+06	1.87438e+06	3.79905e+06	1.41218e+06	1.54319e+06	2.28651e+06	1.36964e+06
5108	NAE 14:0	-5.19	87.5		271.251	7.642	C16 H33 N O2	271.25	272.257	[M+H]	1.74075e+07	1.3781e+07	1.78697e+07	2.59868e+07	1.61463e+07	1.42843e+07	2.17033e+07	1.36603e+07
5378	NAE 15:0	-4.77	65.5		285.267	7.582	C17 H35 N O2	285.265	286.273	[M+H]	8.27178e+06	1.32123e+07	1.05958e+07	1.78131e+07	1.03131e+07	9.52975e+06	1.48141e+07	6.74159e+06
6190	NAE 20:0	-5.83	84.5		355.345	9.588	C22 H45 N O2	355.343	356.35	[M+H]	1.82489e+08	1.16231e+08	1.4711e+08	1.3796e+08	1.05983e+08	1.31758e+08	1.38719e+08	1.45144e+08
6172	NAE 20:1	-4.9	53.8		353.329	9.067	C22 H43 N O2	353.328	354.335	[M+H]	1.04917e+07	6.87365e+06	8.33222e+06	8.14864e+06	6.10992e+06	7.47131e+06	8.6067e+06	7.69221e+06
6425	Neosolaniol	8.17	28.4		382.163	11.771	C19 H26 O8	382.166	383.173	[M+H]	53278.8	48689.2	9.6844e+06	60775.9	66832	58447.3	56989.6	1.01153e+06
1112	Nicotinamide	-3.27	97.5	C00153	122.048	1.321	C6 H6 N2 O	122.048	123.055	[M+H]	5.54764e+06	404808	3.71074e+06	2.51518e+07	1.85155e+07	7.88924e+06	6.71206e+06	3.79376e+06
1141	Nicotinic acid	-3.89	90.6	C00253	123.032	0.94	C6 H5 N O2	123.032	124.039	[M+H]	2.66965e+06	788187	1.40585e+06	4.04173e+06	2.03795e+06	1.5923e+06	881247	5.84336e+06
2190	N-Methylanthranilic Acid	-5.31	71		151.063	1.297	C8 H9 N O2	151.063	152.07	[M+H]	1.10218e+07	1.54288e+06	7.88266e+06	8.15541e+06	8.57231e+06	9.83058e+06	6.35374e+06	4.08871e+06
1913	N-Methylisoleucine	-6.11	38		145.11	2.804	C7 H15 N O2	145.109	168.099	[M+Na]	4.7331e+06	229721	1.86018e+06	150647	130551	83193.4	26171.9	1.06796e+06
2767	Norharman	-4.92	97.9	C20157	168.069	4.083	C11 H8 N2	168.068	169.075	[M+H]	2.01396e+07	8.4981e+06	1.55208e+07	2.08705e+07	1.51772e+07	2.45834e+07	2.13156e+07	1.38495e+07
5291	Oleamide	-6.04	35.5	C19670	281.272	13.082	C18 H35 N O	281.27	282.277	[M+H]	693040	906635	1.03767e+06	955867	468498	743611	528987	627638
5292	Oleamide	-5.98	89.5	C19670	281.272	13.648	C18 H35 N O	281.27	282.277	[M+H]	1.36708e+07	1.23712e+07	9.93957e+06	607106	1.33312e+07	9.43846e+06	6.82987e+06	1.57257e+07
7529	Palmitoyl sphingomyelin	-8.13	97.7		702.568	12.048	C39 H79 N2 O6 P	702.562	703.569	[M+H]	8.01847e+06	3.07468e+06	498326	1.31808e+08	1.38843e+08	1.2465e+08	3.63975e+07	548081
1607	P-ANISALDEHYDE	-9.75	16.3		136.052	1.652	C8 H8 O2	136.051	137.058	[M+H]	3.56699e+06	3.28113e+06	683517	743068	1.1501e+06	603056	1.47534e+06	5.98128e+06
3151	Paraxanthine	17.38	87.8	C13747	180.065	4.051	C7 H8 N4 O2	180.068	181.075	[M+H]	1.04541e+07	5.74707e+06	5.1355e+06	1.81971e+07	1.91288e+07	2.81194e+07	1.55623e+07	1.01819e+07
2629	Phenethylacetate	-4.95	69.9		164.084	4.763	C10 H12 O2	164.083	165.09	[M+H]	1.11167e+06	1.38269e+07	1.32222e+06	1.85255e+07	1.69498e+07	1.68347e+07	7.12035e+06	1.49011e+07
1083	Phenethylamine	-3.33	94.7	C05332	121.089	5.538	C8 H11 N	121.089	122.096	[M+H]	1.31541e+07	1.06136e+07	1.17216e+07	3.17408e+07	1.07031e+07	1.02416e+07	1.31251e+07	1.19322e+07
1084	Phenethylamine	-2.76	43.6	C05332	121.089	5.073	C8 H11 N	121.089	122.096	[M+H]	1.189e+07	1.84787e+07	1.71134e+07	1.0537e+07	2.07685e+07	1.99116e+07	2.04065e+07	1.73474e+07
282	Phenol	-0.01	60		94.0419	3.853	C6 H6 O	94.0419	95.0491	[M+H]	7.66613e+06	1.93749e+07	4.52458e+08	2.62555e+07	2.1982e+07	2.16368e+07	1.67276e+08	2.40869e+07
1672	Phenylethanolamine	-4.69	41	C02735	137.084	1.757	C8 H11 N O	137.083	138.091	[M+H]	666650	645445	7.76719e+07	929178	826535	824099	815965	778639
357	Phosphoric acid	0.21	15.8		97.9769	1.293	H3 O4 P	97.9769	98.9842	[M+H]	1.96881e+06	1.94893e+06	2.25576e+06	2.64398e+06	3.6888e+07	1.97688e+06	1.86015e+06	2.00988e+06
358	Phosphoric acid	0.55	39.3		97.9769	0.878	H3 O4 P	97.977	98.9842	[M+H]	1.05217e+07	8.33317e+06	9.59616e+06	1.07024e+07	1.03532e+07	1.00872e+07	9.7481e+06	8.00319e+06
2017	Phthalic anhydride	-5.36	93.7		148.016	11.43	C8 H4 O3	148.015	149.023	[M+H]	9.44802e+08	9.03861e+08	8.31754e+08	1.16218e+09	1.00854e+09	1.06065e+09	9.16915e+08	8.85062e+08
5759	Phytosphingosine	-7.56	75.8	C12144	317.293	7.577	C18 H39 N O3	317.291	318.298	[M+H]	1.19726e+09	9.29239e+08	3.00383e+08	1.30551e+09	9.50964e+08	1.0564e+09	1.11699e+09	8.78486e+08
5760	Phytosphingosine	-6.85	74.6	C12144	317.293	7.253	C18 H39 N O3	317.291	318.298	[M+H]	1.30994e+08	1.56122e+08	8.5312e+08	104010	166011	1.9266e+08	1.55488e+08	4.35278e+08
1146	Picolinic acid	-2.95	84.6	C10164	123.032	0.816	C6 H5 N O2	123.032	124.039	[M+H]	1.64746e+06	2.39956e+06	1.11272e+06	4.04173e+06	2.03795e+06	1.5923e+06	1.20971e+06	6.21952e+06
1333	Pipecolic acid	-4.71	21.5		129.079	12.269	C6 H11 N O2	129.078	130.086	[M+H]	1.86765e+06	1.34649e+06	1.49591e+06	1.54916e+06	1.83569e+06	1.45761e+06	2.25446e+06	1.05047e+06
188	Piperidine	2.53	88		85.0892	2.814	C5 H11 N	85.0894	86.0966	[M+H]	1.21188e+07	1.04276e+06	5.38797e+06	2.90791e+06	975667	1.24362e+06	2.68212e+06	3.78416e+06
3834	Prespatane	-5.35	57.1		204.188	10.031	C15 H24	204.187	205.194	[M+H]	1.51833e+07	4.48779e+06	1.15608e+07	1.50661e+07	1.62545e+07	1.30461e+07	3.90643e+07	3.36039e+06
3836	Prespatane	-5.28	72.7		204.188	10.172	C15 H24	204.187	205.194	[M+H]	1.3599e+07	3.65475e+06	1.03017e+07	1.49339e+07	1.64213e+07	1.11432e+07	3.59979e+07	2.77003e+06
1848	Proline betaine	-5.41	99.8		143.095	0.85	C7 H13 N O2	143.094	144.101	[M+H]	5.81142e+06	1.76158e+06	7.59338e+06	4.43621e+07	540049	237759	2.89318e+06	1.08725e+07
2851	Prolylglycine	18.85	76.1		172.085	4.733	C7 H12 N2 O3	172.088	173.095	[M+H]	1.47325e+06	819493	1.02224e+06	5.79709e+06	1.1758e+06	1.96306e+06	1.28326e+06	997441
1019	Purine	8.01	37.4		120.044	3.951	C5 H4 N4	120.045	121.052	[M+H]	206993	68954.4	1.40816e+08	147653	85135.3	89583.2	144315	3.38387e+06
1021	Purine	8.71	25.9		120.044	4.308	C5 H4 N4	120.045	121.052	[M+H]	1.1084e+06	1.09517e+06	3.65962e+07	995969	762675	827119	906925	2.76866e+06
3984	Pyocyanin	-4.47	45.5		210.079	4.162	C13 H10 N2 O	210.078	211.086	[M+H]	2.80634e+06	3.76603e+06	6.68916e+06	5.11104e+06	5.97992e+06	6.07938e+06	3.65195e+06	1.15656e+06
2621	Ricinine	19.46	37.5		164.059	0.021	C8 H8 N2 O2	164.062	165.069	[M+H]	4.20517e+06	4.04067e+06	3.97213e+06	5.70873e+06	4.85993e+06	4.58761e+06	4.23926e+06	3.55522e+06
1695	Salicylic acid	-4.83	21.2		138.032	4.415	C7 H6 O3	138.031	139.038	[M+H]	277496	1.24741e+06	1.51912e+06	244047	1.15405e+06	265241	972833	875511
1412	Skatole	-4.4	76.9	C08313	131.073	5.733	C9 H9 N	131.073	132.08	[M+H]	1.49203e+07	2.08329e+07	1.30805e+07	1.59968e+07	1.30868e+07	1.647e+07	1.9248e+07	1.32962e+07
4875	SN-GLYCERO-3-PHOSPHOCHOLINE	-5.67	89.1		257.103	7.735	C8 H20 N O6 P	257.101	258.109	[M+H]	9.18823e+06	7.91393e+06	7.89136e+06	1.14829e+07	7.92584e+06	8.65334e+06	7.87416e+06	5.72235e+06
4876	SN-GLYCERO-3-PHOSPHOCHOLINE	-5.51	88.7		257.103	8.021	C8 H20 N O6 P	257.101	258.109	[M+H]	4.37841e+07	3.31955e+07	4.18348e+07	4.94505e+07	4.58489e+07	4.61502e+07	3.9337e+07	3.85271e+07
5542	Sphingosine	-5.92	34	C00319	299.282	7.323	C18 H37 N O2	299.281	300.288	[M+H]	9.15028e+06	5.48673e+06	8.64535e+06	2.64829e+07	5.5874e+06	7.20205e+06	8.7044e+06	4.79702e+06
5543	Sphingosine	-5.37	34.8	C00319	299.282	7.571	C18 H37 N O2	299.281	300.288	[M+H]	4.49909e+07	3.50525e+07	3.17508e+07	4.67419e+07	3.43977e+07	3.87547e+07	3.98822e+07	2.94431e+07
5341	Stearamide	-6.31	81		283.288	14.192	C18 H37 N O	283.286	284.293	[M+H]	6.13146e+06	5.87596e+06	6.9717e+06	9.60437e+06	5.79622e+06	4.88168e+06	7.6123e+06	7.10259e+06
2913	Suberic acid	3.14	14.3		174.089	5.31	C8 H14 O4	174.09	175.097	[M+H]	1.10863e+06	1.00183e+06	951182	1.61066e+06	1.17933e+06	1.19507e+06	1.24799e+06	957600
4292	tetradec-5-ynoic acid	-5.01	32.1		224.178	9.035	C14 H24 O2	224.177	225.184	[M+H]	5.97827e+06	147346	1.17254e+06	6.49231e+06	1.05147e+06	670344	8.41876e+06	159438
1240	Thymine	-3.34	90	C00178	126.043	1.735	C5 H6 N2 O2	126.043	127.05	[M+H]	5.80715e+06	3.0496e+06	5.56528e+06	8.8847e+06	7.98235e+06	9.14039e+06	4.38222e+06	1.59039e+06
2155	Thymol	-5.6	54.7		150.104	11.164	C10 H14 O	150.104	151.111	[M+H]	6.54593e+06	2.11164e+06	2.61387e+06	7.50542e+06	2.36675e+07	7.662e+06	4.78671e+06	1.83021e+06
2158	Thymol	-5.19	54.8		150.104	11.391	C10 H14 O	150.104	151.111	[M+H]	1.98624e+06	3.21298e+06	8.52349e+06	2.19567e+06	5.95273e+06	5.31211e+06	8.94666e+06	3.46005e+06
3295	Tributylamine	-4.46	94.8		185.214	5.636	C12 H27 N	185.214	186.221	[M+H]	5.56688e+07	1.26081e+07	8.80525e+06	1.7783e+07	1.43162e+07	1.26159e+07	1.22771e+07	2.22552e+07
1655	Trigonelline	-5.5	97.7	C01004	137.048	0.851	C7 H7 N O2	137.047	138.054	[M+H]	2.09094e+07	9.95953e+06	2.58294e+07	1.03924e+08	4.36736e+06	2.75628e+06	1.10599e+07	4.00542e+07
2470	Tryptamine	-5.11	10.1		160.1	1.759	C10 H12 N2	160.099	161.107	[M+H]	22163.1	20940.7	1.70186e+06	27925.2	24439.2	25443.7	22678.4	39098.5
2496	Tryptophol	-5.85	57.2	C00955	161.084	6.569	C10 H11 N O	161.083	162.09	[M+H]	2.1393e+06	2.74961e+06	2.18991e+06	1.77651e+06	1.14318e+06	3.89804e+06	1.34343e+06	9.06376e+07
2497	Tryptophol	-5.79	55	C00955	161.084	6.67	C10 H11 N O	161.083	162.09	[M+H]	3.91784e+06	919773	2.19672e+06	3.54953e+06	1.15666e+06	1.29274e+06	2.3595e+06	8.46816e+07
1674	Tyramine	-4.46	50.4	C00483	137.084	5.606	C8 H11 N O	137.083	138.091	[M+H]	734680	613811	736241	780388	780674	809821	663514	3.76242e+07
6074	Tyr-Tyr	-4.92	24.1		344.137	3.929	C18 H20 N2 O5	344.136	345.143	[M+H]	317369	1.59272e+06	1.12131e+06	1.50449e+06	1.30347e+06	1.2936e+06	1.06403e+06	127641
741	Uracil	-1.91	88.9	C00106	112.027	1.31	C4 H4 N2 O2	112.027	113.034	[M+H]	3.65453e+06	773480	2.06539e+06	698303	1.60815e+06	1.58591e+06	405270	3.64305e+06
1706	Veratrole	-4.61	66.9		138.068	5.325	C8 H10 O2	138.067	139.075	[M+H]	3.34967e+06	6.7491e+06	2.39132e+06	1.66636e+06	3.89788e+06	5.28712e+06	2.40947e+06	4.49405e+06
2238	Xanthine	-6.15	44.2		152.033	1.298	C5 H4 N4 O2	152.032	153.04	[M+H]	4.57406e+06	83577.9	1.67246e+06	382581	98168	119350	84007.9	64933.2

## Sheet: Positive mode internal standard
id	MS2.name	MS2.ppm	MS2.score	KEGG.ID	Monoisotopic.Molecular.Weight	RT.[min]	Formula	Molecular.Weight	m/z	Reference Ion	1	50	a	J2		C5	C9	C10	C18
1237	Phloroglucinol	-3.27	36.8	C02183	126.032	0.804	C6 H6 O3	126.031	127.039	[M+H]	47.7039	82.2549	25.1306	360.342		54.496	72.2361	58.5913	66.4624
2706	Apocynin	-4.93	35.6	C11380	166.063	5.591	C9 H10 O3	166.062	167.069	[M+H]	43.9302	12.3527	39.9414	1944.46		5.51269	71.0302	35.4442	354.357
2711	Apocynin	-4.59	39.8	C11380	166.063	5.188	C9 H10 O3	166.062	167.07	[M+H]	28.5309	203.46	244.16	8.19904		18.9354	41.9878	56.8663	9.91438
1707	Beta-orcinol	-4.58	26.4		138.068	5.188	C8 H10 O2	138.067	139.075	[M+H]	105.892	363.268	470.646	59.9211		60.0501	130.314	149.061	111.601
3233	Epinephrine	-4.68	39.7		183.09	5.608	C9 H13 N O3	183.089	184.096	[M+H]	3.3516	0.617766	1.08819	4460.78		0.815686	0.848948	0.767949	1.00158
683	Hydroquinone	-1.66	61.9		110.037	5.638	C6 H6 O2	110.037	111.044	[M+H]	402.332	753.217	837.85	1520.29		508.174	763.27	736.948	797.804
1179	Orcinol	-4.84	34.8		124.052	6.617	C7 H8 O2	124.052	125.059	[M+H]	77.2023	95.1416	197.302	33023.5		72.7904	84.497	80.4504	107.888
755	1,3 Cyclohexanedione	-1.38	55.3		112.052	5.508	C6 H8 O2	112.052	113.06	[M+H]	44.398	66.3988	55.9936	173.856		45.0055	379.438	241.139	86.832
6727	1,4-bis(p-tolylamino)anthraquinone	-4.35	74		418.168	5.335	C28 H22 N2 O2	418.166	419.174	[M+H]	1.57294	1.36856	2.00646	2555.97		3.2209	1.6648	1.66391	1.89018
6729	1,4-bis(p-tolylamino)anthraquinone	-3.33	63.8		418.168	5.098	C28 H22 N2 O2	418.167	419.174	[M+H]	1.02576	1.06958	1.6299	189.49		1.1128	1.6332	1.67402	1.66298
6730	1,4-bis(p-tolylamino)anthraquinone	2.94	79.4		418.168	5.139	C28 H22 N2 O2	418.169	419.177	[M+H]	0.453547	66.8963	29.2177	74.3484		0.500857	0.73508	0.753451	0.665107
3980	1-acetyl beta carboline	-4.89	82.5		210.079	8.242	C13 H10 N2 O	210.078	211.086	[M+H]	781.152	433.618	860.733	653.307		647.869	812.182	836.733	918.396
7080	1-O-Hexadecyl-sn-glycero-3-phosphocholine	-5.68	92.6		481.353	10.713	C24 H52 N O6 P	481.35	482.358	[M+H]	56.4957	19.712	70.216	74.2006		349.319	51.2602	19.1568	7.89778
1573	2-Aminoacetophenone	-4.78	69.7		135.068	3.353	C8 H9 N O	135.068	136.075	[M+H]	81.0145	51.4781	877.475	130.442		56.4611	172.648	54.2656	75.9378
1578	2-Aminoacetophenone	-4.54	27.1		135.068	3.694	C8 H9 N O	135.068	136.075	[M+H]	88.6206	88.2245	46.0616	100.9		82.7487	78.8479	162.204	100.881
1221	2-Aminoethylphosphonic acid	-6.03	44.4		125.024	3.669	C2 H8 N O3 P	125.023	126.031	[M+H]	44.5413	0.430763	39.8317	0.462191		6.4846	0.528919	6.21405	3.38291
654	2-Aminophenol	-2.35	95.7		109.053	3.846	C6 H7 N O	109.053	110.06	[M+H]	197.256	88.4051	802868	5738.86		145.976	211.119	532.581	214.218
663	2-Aminophenol	-1.46	84.9		109.053	3.451	C6 H7 N O	109.053	110.06	[M+H]	143.339	127.534	721.901	365.167		96.8077	171.969	152.905	363.565
921	2-HYDROXY-2-METHYLBUTYRIC ACID	-4.56	27.7		118.063	9.136	C5 H10 O3	118.062	119.07	[M+H]	96.9133	42.1903	46.9656	3.17952		2.58567	3.45699	7.53408	28.6774
923	2-HYDROXY-2-METHYLBUTYRIC ACID	4.68	28		118.063	9.207	C5 H10 O3	118.064	119.071	[M+H]	40.7303	15.3331	27.848	3.34433		2.83703	12.9538	93.4298	59.2084
2178	2-hydroxybenzothiazole	-4.87	40		151.009	4.757	C7 H5 N O S	151.008	152.016	[M+H]	83.9998	85.0041	187.022	234.227		156.869	105.951	93.2959	218.201
2181	2-Hydroxybenzothiazole	-4.65	52.2		151.009	4.93	C7 H5 N O S	151.008	152.016	[M+H]	199.101	216.986	107.27	105.37		98.6319	91.8269	112.739	182.237
1754	2-Methoxyresorcinol	-4.54	48.3		140.047	5.443	C7 H8 O3	140.047	141.054	[M+H]	12.5834	28.5004	111.443	11.578		1.51201	6.60775	3.5845	30.3498
2438	2-methylquinolin-8-ol	-4.85	87.2		159.068	4.004	C10 H9 N O	159.068	160.075	[M+H]	84.7757	69.7478	140.651	337.309		83.352	86.9502	80.7922	94.5128
2439	2-methylquinolin-8-ol	-4.81	91.9		159.068	4.325	C10 H9 N O	159.068	160.075	[M+H]	67.2835	84.9708	345.553	2177.55		100.211	67.0364	80.2785	165.048
2444	2-methylquinolin-8-ol	-4.52	78.9		159.068	4.491	C10 H9 N O	159.068	160.075	[M+H]	47.0635	93.9435	132.609	270.126		86.719	145.933	166.188	104.688
2846	2-naphthoic acid	-4.25	55.8		172.052	5.506	C11 H8 O2	172.052	173.059	[M+H]	219.275	9.44839	20.4039	2.43864		11.3995	10.7622	22.1531	2.4147
1477	2-Oxindole	-5.16	97.5	C12312	133.053	0.866	C8 H7 N O	133.052	134.059	[M+H]	1578.96	532.676	1228.26	749.969		634.202	1277.52	1378.52	1023.21
1482	2-Oxindole	-4.31	83	C12312	133.053	1.347	C8 H7 N O	133.052	134.059	[M+H]	306.812	290.609	941.926	652.714		382.739	861.095	905.956	657.299
1571	2-Phenylacetamide	-5.61	63.7		135.068	0.867	C8 H9 N O	135.068	136.075	[M+H]	120.479	213.224	396.865	157.683		172.135	162.038	158.155	159.658
168	2-Pyrrolidinone	2.08	86.1		85.0528	3.652	C4 H7 N O	85.0529	86.0602	[M+H]	370.931	38.7938	90.1858	50.5151		65.9914	38.247	47.4824	70.5725
169	2-Pyrrolidinone	2.33	90.5		85.0528	4.145	C4 H7 N O	85.053	86.0602	[M+H]	255.837	23.0628	172.135	139.795		161.357	82.7379	83.2554	643.44
172	2-Pyrrolidinone	2.46	75.3		85.0528	3.944	C4 H7 N O	85.053	86.0602	[M+H]	43.6155	25.6825	32.4682	35.5397		62.2823	416.542	227.915	40.9037
2434	3-Acetylindole	-5.32	41.1		159.068	6.818	C10 H9 N O	159.068	160.075	[M+H]	24.2287	60.753	23.229	335.874		255.462	74.8188	77.8837	66.2056
2443	3-Acetylindole	-4.65	41.1		159.068	6.961	C10 H9 N O	159.068	160.075	[M+H]	53.9066	40.426	74.8667	123.385		345.123	74.8188	47.2533	66.2056
662	3-Aminophenol	-1.48	99.7		109.053	1.476	C6 H7 N O	109.053	110.06	[M+H]	1917.98	800.674	2338.41	1795.15		729.124	1622.03	2060.38	1705.07
667	3-Aminophenol	-1.35	78.9		109.053	1.723	C6 H7 N O	109.053	110.06	[M+H]	318.038	754.753	317.149	683.652		294.137	446.161	505.957	527.194
737	3-FUROIC ACID	-2.77	23.6		112.016	6.575	C5 H4 O3	112.016	113.023	[M+H]	1.56854	2.7779	3.51694	2586.34		1.38115	2.12228	2.75785	6.62219
738	3-FUROIC ACID	-2.43	25.3		112.016	6.665	C5 H4 O3	112.016	113.023	[M+H]	1.24754	5.89557	7.944	2472.96		1.55845	2.47953	1.81401	12.9979
2290	3-Hydroxyanthranilic acid	-5.01	51.1	C00632	153.043	2.78	C7 H7 N O3	153.042	154.049	[M+H]	4.28681	1.5025	1.06969	193.727		7.31979	7.58831	3.98638	21.9113
1091	3-Hydroxybenzaldehyde	-4.1	45.1		122.037	10.793	C7 H6 O2	122.036	123.044	[M+H]	52.3586	33.7027	140.82	38.0015		74.428	80.1698	42.8456	239.183
1696	3-HYDROXYBENZOIC ACID	-4.47	21.2		138.032	4.861	C7 H6 O3	138.031	139.038	[M+H]	27.8942	28.4273	33.812	57.5184		37.6372	48.909	47.9405	58.5551
1726	3-Hydroxypicolinic acid	-4.57	96.6	C18620	139.027	1.798	C6 H5 N O3	139.026	140.034	[M+H]	6.00154	1.45375	1.47864	154.444		4.97556	1.42019	1.33511	5.28648
1188	3-METHYLCATECHOL	-2.94	74.8		124.052	3.816	C7 H8 O2	124.052	125.059	[M+H]	68.802	68.246	66.5186	566.588		66.7218	89.2571	79.7983	87.5937
2790	3-Methylhistidine	19.16	92.5	C01152	169.085	6.409	C7 H11 N3 O2	169.088	170.096	[M+H]	75.0098	81.9906	87.2356	88.7912		230.118	97.2007	89.5006	86.9296
1982	3-Methyloxyindole	-4.4	11.4		147.068	5.29	C9 H9 N O	147.068	148.075	[M+H]	24.2715	31.5799	33.5814	111.81		29.87	48.0984	38.9439	33.4115
1983	3-Methyloxyindole	-4.33	12.1		147.068	5.055	C9 H9 N O	147.068	148.075	[M+H]	81.7464	654.49	92.1111	115.723		55.2087	79.2378	90.9401	132.649
1984	3-Methyloxyindole	-4.2	13.4		147.068	4.85	C9 H9 N O	147.068	148.075	[M+H]	54.8999	25.3141	80.0466	34.2102		29.0395	79.2378	37.4752	34.9433
1366	4-Acetylbutyric acid	16.83	46.8		130.063	6.473	C6 H10 O3	130.065	131.072	[M+H]	32.6329	10.5268	38.4859	24.7926		59.7017	10.9521	16.0629	67.878
451	4-AMINOBUTANOATE	-0.75	73.1		103.063	7.541	C4 H9 N O2	103.063	104.071	[M+H]	112.812	132.281	58.0659	70.3295		56.7247	108.993	110.713	105.012
656	4-Aminophenol	-2.18	84.3		109.053	4.594	C6 H7 N O	109.053	110.06	[M+H]	1297.84	111.357	7202	272.67		172.938	127.46	607.313	283.289
1236	4-Hydroxy-6-methyl-2-pyrone	-3.54	57.4	C02752	126.032	3.84	C6 H6 O3	126.031	127.039	[M+H]	40.7469	53.9237	80.3524	30.7091		21.6509	45.4468	45.4491	75.3725
1100	4-Hydroxybenzaldehyde	-3	86.3	C00633	122.037	3.454	C7 H6 O2	122.036	123.044	[M+H]	131.742	39.6521	60.1182	82.8112		84.7043	48.6692	52.917	85.2848
1105	4-Hydroxybenzaldehyde	-2.72	36.8		122.037	3.725	C7 H6 O2	122.036	123.044	[M+H]	37.7379	48.4069	41.0159	431.614		27.7734	64.9603	75.1229	43.4776
1693	4-Hydroxybenzoic acid	-5.3	33.1		138.032	6.575	C7 H6 O3	138.031	139.038	[M+H]	11.5907	74.2918	76.1928	20313.7		24.5381	12.4011	11.389	116.674
1694	4-Hydroxybenzoic acid	-5.08	48.1	C00156	138.032	6.669	C7 H6 O3	138.031	139.038	[M+H]	27.824	74.2918	76.1928	26060.7		24.5381	22.7713	28.8673	40.9029
1487	4-Hydroxyindole	-4.08	90.4	C12312	133.053	3.774	C8 H7 N O	133.052	134.06	[M+H]	117.467	256.962	92.7451	350.445		269.129	299.534	339.1	562.483
2081	4-Hydroxymandelonitrile	-5.06	13.5		149.048	3.495	C8 H7 N O2	149.047	150.054	[M+H]	65.6683	36.3177	39.4959	31.1096		84.8362	32.1681	53.6883	75.8367
2085	4-Hydroxymandelonitrile	-4.93	19.9		149.048	3.667	C8 H7 N O2	149.047	150.054	[M+H]	28.6038	14.7215	39.4959	7.87948		73.5782	12.8694	28.998	24.5422
1154	4-Methoxyaniline	-3.09	63.1		123.068	2.179	C7 H9 N O	123.068	124.075	[M+H]	54.5964	49.5482	1027.91	69.858		33.991	52.6042	61.9277	70.6885
1155	4-Methoxyaniline	-2.95	54.7		123.068	2.609	C7 H9 N O	123.068	124.075	[M+H]	126.229	110.975	379.144	167.223		94.5026	169.284	168.321	137.184
1828	4-Methyl-5-thiazoleethanol	-4.42	97.9	C04294	143.04	2.746	C6 H9 N O S	143.04	144.047	[M+H]	59.967	177.202	185.498	306.829		46.3769	222.331	675.706	43.5744
1725	4-NITROPHENOL	-5.29	36.1		139.027	6.586	C6 H5 N O3	139.026	140.033	[M+H]	0.912595	0.907273	1.29072	477.534		1.3096	2.01233	1.38932	1.35049
2625	4-Phenylbutyric acid	-5.22	88.7		164.084	7.753	C10 H12 O2	164.083	165.09	[M+H]	753.007	48.8273	771.64	53.5565		150.009	510.727	1116.93	454.32
2630	4-Phenylbutyric acid	-4.94	90.9		164.084	7.907	C10 H12 O2	164.083	165.09	[M+H]	5549.8	266.096	5184.52	439.375		772.841	2242.08	4343.63	2760.4
1490	5-Hydroxyindole	-3.88	66.7		133.053	3.238	C8 H7 N O	133.052	134.06	[M+H]	177.191	161.595	247.975	203.999		164.164	227.719	226.638	306.593
3467	5-Hydroxyindole-3-acetic acid	-4.64	48.3	C05635	191.058	4.876	C10 H9 N O3	191.057	192.065	[M+H]	23.3849	324.619	259.044	5.59272		13.0268	4.58198	5.75436	3.25389
2545	5-Hydroxylysine	19.87	36.9		162.1	5.303	C6 H14 N2 O3	162.104	163.111	[M+H]	121.663	62.5913	76.4883	133.465		67.2455	168.888	177.335	149.656
1806	5-HYDROXYMETHYL-2-FURANCARBOXYLIC ACID	-5.66	29.6		142.027	6.577	C6 H6 O4	142.026	143.033	[M+H]	3.37642	6.58091	5.25503	1289.19		5.41341	4.02449	4.30896	2.16929
3848	5-Methoxyindoleacetic acid	-5.17	56.2	C05660	205.074	4.124	C11 H11 N O3	205.073	206.08	[M+H]	7.81461	5.76397	1.77545	5.33467		10.8506	9.81772	6.87253	53.1651
3078	5-PHENYLVALERIC ACID	-5.87	46.3		178.099	11.185	C11 H14 O2	178.098	179.106	[M+H]	581.109	161.204	177.915	123.88		257.558	332.033	270.749	167.852
1838	6-Methylquinoline	-4.45	85.5		143.073	3.958	C10 H9 N	143.073	144.08	[M+H]	324.606	380.002	509.474	422.092		383.504	170.747	465.52	634.227
1842	6-Methylquinoline	-4.12	94.6		143.073	4.434	C10 H9 N	143.073	144.08	[M+H]	162.555	488.393	175.139	315.964		211.569	545.883	372.958	317.594
2718	6-Pentyl-2H-pyran-2-one	-4.45	49.4		166.099	5.183	C10 H14 O2	166.099	167.106	[M+H]	13.0991	141.677	140.115	42.3098		13.6412	17.5497	16.2939	51.2332
4216	7-(2-aminophenyl)heptanoic acid	-4.69	48.4		221.142	8.255	C13 H19 N O2	221.141	222.148	[M+H]	1016.48	73.6373	484.544	22.1		133.106	159.482	131.39	296.94
4831	7,8-Dihydroneopterin	-9.67	15.3		255.097	6.73	C9 H13 N5 O4	255.094	256.102	[M+H]	1.64665	1.58561	2.3811	1124.92		6.00614	5.10081	3.73173	3.4472
1025	Acetophenone	-3.32	80.4	C07113	120.058	3.993	C8 H8 O	120.057	121.064	[M+H]	3976.26	825.813	2038.2	4630.29		2608.94	1348.64	757.54	1561.38
1028	Acetophenone	-2.98	73.9	C07113	120.058	3.842	C8 H8 O	120.057	121.064	[M+H]	163.992	472.006	481.513	953.95		198.085	208.65	410.02	218.845
2383	Acetylproline	-4.63	46.8		157.074	8.268	C7 H11 N O3	157.073	158.08	[M+H]	427.564	22.9357	294.859	11.4089		84.176	89.2713	15.8197	125.938
1566	Adenine	-4.76	98.1	C00147	135.054	1.684	C5 H5 N5	135.054	136.061	[M+H]	513.823	548.953	802.308	6500.02		157.172	436.414	502.316	88.234
1567	Adenine	-4.69	70.2	C00147	135.054	1.483	C5 H5 N5	135.054	136.061	[M+H]	66.299	8.25461	29.7394	451.647		156.795	9.31515	6.61267	23.7893
5062	Adenosine	-5.36	91.2	C00212	267.097	1.687	C10 H13 N5 O4	267.095	268.103	[M+H]	7.94028	10.2161	9.65711	130.865		2.13817	6.16089	9.64524	1.12878
1935	ADIPATE	-4.82	14.3		146.058	9.207	C6 H10 O4	146.057	147.064	[M+H]	699.522	731.02	818.756	917.413		679.393	764.911	671.1	838.674
273	Aniline	-0.34	32.8		93.0579	3.819	C6 H7 N	93.0578	94.0651	[M+H]	190.476	186.476	2901.6	364.092		194.605	234.77	204.048	202.236
277	Aniline	1.08	83.4		93.0579	4.121	C6 H7 N	93.058	94.0652	[M+H]	343.591	342.123	312.003	785.934		325.429	203.427	220.438	212.075
4613	Anserine	-9.8	18		240.122	7.093	C10 H16 N4 O3	240.12	241.127	[M+H]	2.15339	1.32979	2.29352	2.02912		1.89539	37.5806	101.909	2.28684
5612	Arachidonic acid	-6.38	86.2	C00219	304.24	10.781	C20 H32 O2	304.238	305.246	[M+H]	411.022	83.9544	829.505	21.2177		745.487	623.177	150.221	2010.09
7623	Beauvericin	-9.43	92.9		783.409	12.89	C45 H57 N3 O9	783.402	784.41	[M+H]	464.388	6.40225	1.32165	1.20262		1.03973	1.84351	1.63053	30365.4
7624	Beauvericin	-9.37	92.4		783.409	13.201	C45 H57 N3 O9	783.402	784.409	[M+H]	8917.13	6213.3	2207.38	640.288		4074.41	689.961	140.686	14371.9
7625	Beauvericin	-9.24	91.5		783.409	12.768	C45 H57 N3 O9	783.402	784.41	[M+H]	10.9327	3.6015	0.432615	0.399239		0.445452	0.679673	0.630576	14651.8
7626	Beauvericin	-9.22	94.6		783.409	13.057	C45 H57 N3 O9	783.402	784.41	[M+H]	16830.1	6248.67	2218.22	639.941		4136.85	694.394	139.343	26986.9
1066	Benzamide	-3.75	39.5		121.053	3.991	C7 H7 N O	121.052	122.06	[M+H]	149.427	129.585	526.574	149.522		125.227	163.287	140.523	150.235
1096	Benzoic acid	-3.39	62.3		122.037	4.652	C7 H6 O2	122.036	123.044	[M+H]	48.184	65.9051	76.6701	260.433		84.4469	113.953	146.588	88.8046
628	BENZYL ALCOHOL	-1.01	84.7		108.058	2.975	C7 H8 O	108.057	109.065	[M+H]	218.693	264.136	582.541	282.019		211.706	275.8	280.796	310.676
629	BENZYL ALCOHOL	-0.94	82.2		108.058	3.314	C7 H8 O	108.057	109.065	[M+H]	237.292	266.545	287.859	636.347		307.512	506.373	512.063	461.136
884	Betaine	-2.85	99.1	C00719	117.079	0.812	C5 H11 N O2	117.079	118.086	[M+H]	1540.69	624.34	2549.84	3337.05		9194.44	256.884	112.433	796.016
3565	Caffeine	16.1	97.8	C07481	194.08	4.099	C8 H10 N4 O2	194.083	195.091	[M+H]	43.8269	28.8501	59.3493	30.1999		57.6138	90.2255	153.383	73.5913
3566	Caffeine	16.24	98.2	C07481	194.08	4.34	C8 H10 N4 O2	194.084	195.091	[M+H]	698.236	441.775	1056.76	1023.39		1332.01	1542.09	2202.55	1168.21
460	Choline	-0.72	97.6	C00114	103.1	0.755	C5 H13 N O	103.1	104.107	[M+H]	1310.65	1196.16	1707.57	1741.97		2160.22	1291.04	1171.03	1482.35
2034	Cinnamic acid	-5.76	42.4		148.052	3.817	C9 H8 O2	148.052	149.059	[M+H]	43.8779	38.9058	75.4506	77.0282		39.7086	49.3647	42.0845	46.7357
2038	Cinnamic acid	-5.46	40.9		148.052	4.133	C9 H8 O2	148.052	149.059	[M+H]	37.7375	77.1264	62.6894	156.661		32.7905	44.5032	46.1599	177.916
2266	Citral	-5.79	85.2	C01499	152.12	13.649	C10 H16 O	152.119	153.127	[M+H]	381.519	386.543	318.598	530.416		29.5386	422.94	277.223	238.246
5769	Coenzyme Q2	6.95	85.8	C00399	318.183	10.617	C19 H26 O4	318.185	319.193	[M+H]	3582.55	4363.25	4240.24	3730.97		2879.78	4206.61	3950.7	4189.42
196	Crotonic acid	1.99	51.9	C01771	86.0368	0.79	C4 H6 O2	86.037	87.0442	[M+H]	26.3317	50.7854	134.621	141.966		54.8431	34.8039	24.963	161.651
195	DIACETYL	1.91	29.7		86.0368	4.146	C4 H6 O2	86.0369	87.0442	[M+H]	84.9516	60.043	110.459	40.5174		572.468	73.206	74.6271	123.071
3685	DICTAMNINE	-4.77	22.6		199.063	4.93	C12 H9 N O2	199.062	200.07	[M+H]	33.5922	1.58086	10.1959	5.16654		8.3718	2.13837	10.8914	4.67864
3686	DICTAMNINE	-4.68	77.1		199.063	4.588	C12 H9 N O2	199.062	200.07	[M+H]	16.9788	4.42953	11.9455	10.8099		74.5827	62.9574	58.587	41.7005
520	DIETHANOLAMINE	-0.9	73.3		105.079	5.303	C4 H11 N O2	105.079	106.086	[M+H]	394.605	371.85	518.321	401.831		263.552	317.579	389.237	600.156
57	Dimethyl sulfoxide	2.95	96.9		78.0139	0.881	C2 H6 O S	78.0142	79.0214	[M+H]	132437	143473	145647	127675		168847	189982	165728	182312
58	Dimethyl sulfoxide	3.33	97.1		78.0139	1.294	C2 H6 O S	78.0142	79.0215	[M+H]	40803.1	46238.7	45555.7	39311.7		48623.5	60741.7	52677.8	53860.9
7557	DL-Dipalmitoylphosphatidylcholine	-6.56	94.7		733.562	14.467	C40 H80 N O8 P	733.557	734.564	[M+H]	58.9374	61.3608	51.7804	66.9785		38.0807	90.7538	104.695	91.8812
3232	DL-NORMETANEPHRINE	-5.01	23.7		183.09	10.143	C9 H13 N O3	183.089	184.096	[M+H]	100.108	7.33542	120.681	10.7125		332.17	117.458	45.4108	223.69
5982	Docosatrienoic acid	-5.72	58.6		334.287	12.541	C22 H38 O2	334.285	335.293	[M+H]	36.9867	28.2867	68.8864	31.7791		26.4089	31.9762	20.5017	44.3168
2299	Dopamine	-4.85	35.6	C03758	153.079	1.384	C8 H11 N O2	153.078	154.086	[M+H]	26.5965	123.101	100.669	29.701		68.6179	70.6725	58.3372	74.2471
1334	D-Pipecolinic acid	-3.71	40.5		129.079	0.709	C6 H11 N O2	129.078	130.086	[M+H]	15.2166	14.4695	13.4834	52.5476		43.663	17.9112	13.2022	12.792
6007	Erucamide	-9.41	90.4		337.334	13.651	C22 H43 N O	337.331	338.339	[M+H]	7839.28	10603.5	8732.48	11986.2		175.657	12297.4	6634.58	4957.5
6008	Erucamide	-5.82	78.1		337.334	14.014	C22 H43 N O	337.332	338.34	[M+H]	174.225	116.464	252.914	289.806		132.382	232.506	118.981	103.381
6010	Erucamide	-5.63	66		337.334	14.095	C22 H43 N O	337.333	338.34	[M+H]	126.392	191.017	172.84	273.228		45.3156	177.983	103.532	103.381
1434	Ethyl malonate	16.6	45.3		132.042	5.712	C5 H8 O4	132.044	133.052	[M+H]	15.5439	11.9673	32.9808	169.184		18.7572	15.3018	24.2609	58.8229
4866	Ethyl myristate	-6.2	68.7		256.24	12.181	C16 H32 O2	256.239	257.246	[M+H]	129.699	165.791	198.934	284.515		242.907	290.44	388.506	328.544
2948	Guanidinosuccinic acid	18.53	86.5	C03139	175.059	4.038	C5 H9 N3 O4	175.063	176.07	[M+H]	113.184	102.661	82.7352	14.9542		20.1969	88.6431	82.2685	27.0354
2186	Guanine	-4.65	88.1	C00242	151.049	1.641	C5 H5 N5 O	151.049	152.056	[M+H]	4.03156	5.42783	9.8704	257.669		0.790836	4.07852	3.46854	0.966821
3211	Harmane	-4.31	95.2		182.084	4.314	C12 H10 N2	182.084	183.091	[M+H]	79.4028	37.3319	380.762	113.467		168.519	174.108	424.329	116.493
4838	Hexadecanamide	-6.15	95.2		255.256	13.106	C16 H33 N O	255.255	256.262	[M+H]	21.5013	40.4939	45.5038	54.1841		45.2176	48.236	39.6657	29.7299
4839	Hexadecanamide	-6.06	92.4		255.256	12.835	C16 H33 N O	255.255	256.262	[M+H]	212.71	208.155	254.432	259.96		165.034	237.289	190.528	113.735
1603	Hypoxanthine	-5.48	59.6	C00262	136.039	0.87	C5 H4 N4 O	136.038	137.045	[M+H]	152.807	37.0454	241.976	215.876		943.351	18.7028	6.25763	49.0326
1604	Hypoxanthine	-5.41	98	C00262	136.039	1.296	C5 H4 N4 O	136.038	137.045	[M+H]	125.569	32.3342	220.82	186.904		701.692	19.3449	3.73775	39.1967
877	Indole	-2.41	97.6	C00463	117.058	5.535	C8 H7 N	117.058	118.065	[M+H]	761.48	374.673	1574.85	944.526		1488.28	1452.92	1474.83	838.857
881	Indole	-2.13	93.2	C00463	117.058	5.1	C8 H7 N	117.058	118.065	[M+H]	427.93	745.063	582.698	550.181		368.352	460.512	496.444	487.566
2946	Indole-3-acetic acid	-5.04	98.8	C00954	175.063	5.766	C10 H9 N O2	175.062	176.07	[M+H]	137.515	11.2902	77.2447	37.5489		15.2312	23.1926	75.8358	293.025
3788	Indole-3-butyric acid	-4.43	67.2	C11284	203.095	6.508	C12 H13 N O2	203.094	204.101	[M+H]	17.5195	4.85506	238.523	29.6935		35.7534	3.59059	2.24849	139.98
3330	Indoleacrylic acid	-5.32	92.4		187.063	3.281	C11 H9 N O2	187.062	188.07	[M+H]	16.525	50.0861	20.1165	150.574		68.3311	22.4516	13.3532	16.04
3332	Indoleacrylic acid	-4.58	57.6		187.063	2.95	C11 H9 N O2	187.062	188.07	[M+H]	166.978	166.164	183.333	172.951		36.7151	224.415	228.403	85.1178
3683	IS_2-CHLORO-PHENYLALANINE	-5.58	85.4		199.04	3.312	C9 H10 Cl N O2	199.039	200.046	[M+H]	0	0	0	0		0	0	0	0
1319	Isoquinoline	-4.38	99.9	C06323	129.058	6.83	C9 H7 N	129.057	130.065	[M+H]	641.552	514.859	979.068	1245.77		8956.09	725.625	2664.38	1131.15
1326	Isoquinoline	-3.79	100	C06323	129.058	6.961	C9 H7 N	129.057	130.065	[M+H]	862.74	818.502	979.068	1113.74		8205.28	991.18	2453.82	1416.86
3989	Jasmonic acid	-5.69	63.8	C08491	210.126	10.779	C12 H18 O3	210.124	211.132	[M+H]	82.4118	12.266	297.243	27.7678		276.499	214.307	38.0599	714.061
1807	Kojic acid	-4.39	90.3	C14516	142.027	3.407	C6 H6 O4	142.026	143.033	[M+H]	176.424	81.9833	525.716	585.605		85.6346	156.849	207.663	255.871
3321	L-Alanyl-L-proline	17.12	75		186.1	6.113	C8 H14 N2 O3	186.104	187.111	[M+H]	193.046	191.613	204.084	225.481		172.484	143.314	175.879	175.354
2927	L-Arginine	18.64	98.3	C00062	174.112	4.318	C6 H14 N4 O2	174.115	175.122	[M+H]	85.5663	30.705	161.489	85.2211		43.2051	372.372	430.513	164.558
2954	L-Citrulline	18.4	40.9	C00327	175.096	4.677	C6 H13 N3 O3	175.099	176.106	[M+H]	116.125	47.8809	66.4259	162.367		78.3421	50.8623	37.5658	68.1911
2338	Linalool	-5.28	12.1		154.136	10.553	C10 H18 O	154.135	155.142	[M+H]	55.1904	6.48967	48.8425	17.7562		141.286	31.6446	58.8746	70.6114
2669	L-Phenylalanine	-4.3	14.8		165.079	4.186	C9 H11 N O2	165.078	166.086	[M+H]	14.6621	31.9967	13.4033	27.4638		33.0214	18.4374	12.7699	4.85253
1315	L-Pyroglutamic acid	-4	56.8	C01879	129.043	0.833	C5 H7 N O3	129.042	130.049	[M+H]	11.2803	14.4766	15.7957	82.8513		44.5507	10.9409	11.3675	11.92
897	L-Threonic acid-1,4-lactone	8.23	31.4		118.027	1.296	C4 H6 O4	118.028	119.035	[M+H]	33.6069	5.59104	58.6593	41.8779		143.741	2.94749	2.56019	12.6718
898	L-Threonic acid-1,4-lactone	8.76	30.6		118.027	1.686	C4 H6 O4	118.028	119.035	[M+H]	8.73834	8.24705	20.1039	117.351		3.36449	4.7446	7.13322	0.970922
4633	lumichrome	-4.82	92.7		242.08	5.39	C12 H10 N4 O2	242.079	243.086	[M+H]	80.1684	40.032	71.2606	68.3271		113.215	152.273	166.423	92.7127
7131	LysoPC(16:0/0:0)	-5.91	88.4		495.332	10.301	C24 H50 N O7 P	495.33	496.337	[M+H]	1743.43	1650.73	1680.26	1576.84		7542.81	4074.21	2846.19	2654.9
7200	LysoPC(18:1)	-5.75	84.9		521.348	10.638	C26 H52 N O7 P	521.345	522.352	[M+H]	382.509	390.14	393.594	386.788		2000.93	1116.73	719.736	607.914
7196	LysoPC(18:2)	-5.58	84.9		519.332	9.874	C26 H50 N O7 P	519.33	520.337	[M+H]	900.991	865.13	803.22	718.343		3747.74	2413.85	1528.99	1415.17
7287	LysoPC(20:4)	-5.45	83.7		543.332	9.883	C28 H50 N O7 P	543.33	544.337	[M+H]	204.411	180.918	59.2687	170.757		963.479	583.453	338.8	311.711
7335	LysoPC(22:6)	-5.98	83.8		567.332	9.855	C30 H50 N O7 P	567.329	568.336	[M+H]	108.689	83.8615	71.2988	89.2887		660.761	388.649	223.107	195.66
1233	Maltol	-3.87	91.6	C11918	126.032	3.377	C6 H6 O3	126.031	127.038	[M+H]	37.9121	44.8336	142.492	63.111		48.859	24.5995	26.3962	160.916
1942	Methyl trans-styryl ketone	-5.31	77.6		146.073	7.728	C10 H10 O	146.072	147.08	[M+H]	5326.7	991.739	5620.57	728.773		1135.04	2509.69	5610.54	2987.87
1943	Methyl trans-styryl ketone	-5.2	84		146.073	7.919	C10 H10 O	146.072	147.08	[M+H]	5255.65	856.92	5417.3	582.759		880.52	2510.49	4402.68	2714.6
896	Methylmalonic acid	7.95	14.8		118.027	0.865	C4 H6 O4	118.028	119.035	[M+H]	60.3785	11.6883	92.6745	134.153		200.83	8.86217	8.54992	16.1867
3965	MUCIC ACID	-4.35	17.5		210.038	4.682	C6 H10 O8	210.037	211.044	[M+H]	51.5692	0.529828	10.1765	0.600391		44.8705	18.1208	10.7825	15.5152
2198	N-(2-hydroxyphenyl)acetamide	-4.76	64.6		151.063	4.584	C8 H9 N O2	151.063	152.07	[M+H]	18.9477	25.6249	16.4438	51.3107		32.41	33.1698	18.3501	65.7994
3384	N6,N6,N6-Trimethyl-L-lysine	15.8	52.1	C03793	188.152	10.859	C9 H20 N2 O2	188.155	189.163	[M+H]	284.536	306.64	310.941	272.602		1840.73	1327.99	535.312	887.129
3374	N6-Acetyl-L-lysine	16.42	57	C02727	188.116	4.761	C8 H16 N2 O3	188.119	189.126	[M+H]	152.116	27.8527	264.476	22.0981		127.645	178.631	220.175	245.837
5985	N6-Isopentenyladenosine	-4.48	91.6		335.159	5.034	C15 H21 N5 O4	335.158	336.165	[M+H]	0.728815	2.22079	1.08338	221.333		0.525742	0.647073	0.79313	0.610133
1382	N-Acetylputrescine	-4.11	34.7	C02714	130.111	4.604	C6 H14 N2 O	130.11	131.117	[M+H]	16.411	87.4147	12.0939	7.07781		10.7419	18.0455	25.0677	3.11056
1383	N-Acetylputrescine	-3.86	67	C02714	130.111	4.861	C6 H14 N2 O	130.11	131.117	[M+H]	8.37725	68.8211	70.7801	52.7291		103.083	51.4255	53.1037	89.0962
5108	NAE 14:0	-5.19	87.5		271.251	7.642	C16 H33 N O2	271.25	272.257	[M+H]	538.424	494.163	674.793	525.901		705.124	587.981	491.544	845.691
5378	NAE 15:0	-4.77	65.5		285.267	7.582	C17 H35 N O2	285.265	286.273	[M+H]	255.85	473.771	400.116	259.542		483.339	375.559	327.934	577.247
6190	NAE 20:0	-5.83	84.5		355.345	9.588	C22 H45 N O2	355.343	356.35	[M+H]	5644.47	4167.83	5555.12	5587.84		3743.41	3859.45	4533.98	5405.34
6172	NAE 20:1	-4.9	53.8		353.329	9.067	C22 H43 N O2	353.328	354.335	[M+H]	324.514	246.477	314.64	296.139		221.105	222.497	257.099	335.369
6425	Neosolaniol	8.17	28.4		382.163	11.771	C19 H26 O8	382.166	383.173	[M+H]	1.64794	1.74591	365.701	38.9426		1.64909	2.43374	2.01126	2.22066
1112	Nicotinamide	-3.27	97.5	C00153	122.048	1.321	C6 H6 N2 O	122.048	123.055	[M+H]	171.591	14.5157	140.124	146.054		682.467	674.255	271.481	261.543
1141	Nicotinic acid	-3.89	90.6	C00253	123.032	0.94	C6 H5 N O2	123.032	124.039	[M+H]	82.5737	28.263	53.0874	224.961		109.668	74.2135	54.7936	34.3387
2190	N-Methylanthranilic Acid	-5.31	71		151.063	1.297	C8 H9 N O2	151.063	152.07	[M+H]	340.908	55.325	297.664	157.409		221.288	312.167	338.285	247.58
1913	N-Methylisoleucine	-6.11	38		145.11	2.804	C7 H15 N O2	145.109	168.099	[M+Na]	146.397	8.23739	70.2439	41.115		4.08764	4.75409	2.86281	1.01982
2767	Norharman	-4.92	97.9	C20157	168.069	4.083	C11 H8 N2	168.068	169.075	[M+H]	622.928	304.727	586.094	533.185		566.299	552.687	845.952	830.584
5291	Oleamide	-6.04	35.5	C19670	281.272	13.082	C18 H35 N O	281.27	282.277	[M+H]	21.4361	32.5104	39.1844	24.1631		25.9364	17.0607	25.5888	20.6126
5292	Oleamide	-5.98	89.5	C19670	281.272	13.648	C18 H35 N O	281.27	282.277	[M+H]	422.844	443.609	375.336	605.415		16.4732	485.467	324.792	266.133
7529	Palmitoyl sphingomyelin	-8.13	97.7		702.568	12.048	C39 H79 N2 O6 P	702.562	703.569	[M+H]	248.015	110.253	18.8177	21.1003		3576.46	5056.07	4289.41	1418.27
1607	P-ANISALDEHYDE	-9.75	16.3		136.052	1.652	C8 H8 O2	136.051	137.058	[M+H]	110.329	117.656	25.8108	230.27		20.1623	41.8816	20.7521	57.4884
3151	Paraxanthine	17.38	87.8	C13747	180.065	4.051	C7 H8 N4 O2	180.068	181.075	[M+H]	323.351	206.08	193.926	391.988		493.76	696.588	967.631	606.402
2629	Phenethylacetate	-4.95	69.9		164.084	4.763	C10 H12 O2	164.083	165.09	[M+H]	34.3844	495.809	49.9293	573.67		502.67	617.241	579.307	277.452
1083	Phenethylamine	-3.33	94.7	C05332	121.089	5.538	C8 H11 N	121.089	122.096	[M+H]	406.863	380.587	442.63	459.373		861.253	389.761	352.43	511.434
1084	Phenethylamine	-2.76	43.6	C05332	121.089	5.073	C8 H11 N	121.089	122.096	[M+H]	367.763	662.615	646.233	667.85		285.911	756.298	685.189	795.162
282	Phenol	-0.01	60		94.0419	3.853	C6 H6 O	94.0419	95.0491	[M+H]	237.117	694.75	17085.6	927.309		712.416	800.492	744.555	6518.09
1672	Phenylethanolamine	-4.69	41	C02735	137.084	1.757	C8 H11 N O	137.083	138.091	[M+H]	20.6198	23.1445	2933.03	29.9765		25.2122	30.0988	28.3585	31.795
357	Phosphoric acid	0.21	15.8		97.9769	1.293	H3 O4 P	97.9769	98.9842	[M+H]	60.8961	69.8853	85.1818	77.3776		71.7415	1343.3	68.0277	72.4827
358	Phosphoric acid	0.55	39.3		97.9769	0.878	H3 O4 P	97.977	98.9842	[M+H]	325.441	298.813	362.368	308.111		290.398	377.018	347.116	379.845
2017	Phthalic anhydride	-5.36	93.7		148.016	11.43	C8 H4 O3	148.015	149.023	[M+H]	29223.2	32410.9	31408.6	34073.6		31534.6	36726.6	36498.6	35728.6
5759	Phytosphingosine	-7.56	75.8	C12144	317.293	7.577	C18 H39 N O3	317.291	318.298	[M+H]	37031.8	33320.9	11343	33820.4		35423.6	34630	36352.5	43524.8
5760	Phytosphingosine	-6.85	74.6	C12144	317.293	7.253	C18 H39 N O3	317.291	318.298	[M+H]	4051.72	5598.28	32215.4	16757.6		2.8222	6.0454	6629.73	6058.77
1146	Picolinic acid	-2.95	84.6	C10164	123.032	0.816	C6 H5 N O2	123.032	124.039	[M+H]	50.9568	86.0441	42.0182	239.442		109.668	74.2135	54.7936	47.1375
1333	Pipecolic acid	-4.71	21.5		129.079	12.269	C6 H11 N O2	129.078	130.086	[M+H]	57.7673	48.2826	56.4884	40.4417		42.0347	66.848	50.1585	87.8474
188	Piperidine	2.53	88		85.0892	2.814	C5 H11 N	85.0894	86.0966	[M+H]	374.842	37.3917	203.459	145.684		78.9029	35.5296	42.7948	104.512
3834	Prespatane	-5.35	57.1		204.188	10.031	C15 H24	204.187	205.194	[M+H]	469.626	160.924	436.556	129.37		408.803	591.919	448.938	1522.18
3836	Prespatane	-5.28	72.7		204.188	10.172	C15 H24	204.187	205.194	[M+H]	420.624	131.053	389.011	106.642		405.215	597.994	383.455	1402.7
1848	Proline betaine	-5.41	99.8		143.095	0.85	C7 H13 N O2	143.094	144.101	[M+H]	179.75	63.1674	286.74	418.573		1203.72	19.6663	8.18164	112.736
2851	Prolylglycine	18.85	76.1		172.085	4.733	C7 H12 N2 O3	172.088	173.095	[M+H]	45.5684	29.3856	38.6015	38.4		157.298	42.8175	67.5518	50.0037
1019	Purine	8.01	37.4		120.044	3.951	C5 H4 N4	120.045	121.052	[M+H]	6.40238	2.47258	5317.47	130.274		4.0064	3.10026	3.0827	5.62337
1021	Purine	8.71	25.9		120.044	4.308	C5 H4 N4	120.045	121.052	[M+H]	34.2833	39.2709	1381.94	106.589		27.0245	27.7733	28.4625	35.3393
3984	Pyocyanin	-4.47	45.5		210.079	4.162	C13 H10 N2 O	210.078	211.086	[M+H]	86.8014	135.043	252.595	44.5259		138.682	217.763	209.201	142.302
2621	Ricinine	19.46	37.5		164.059	0.021	C8 H8 N2 O2	164.062	165.069	[M+H]	130.068	144.892	149.995	136.871		154.9	176.978	157.867	165.187
1695	Salicylic acid	-4.83	21.2		138.032	4.415	C7 H6 O3	138.031	139.038	[M+H]	8.58308	44.73	57.3646	33.7059		6.62196	42.0257	9.12735	37.9075
1412	Skatole	-4.4	76.9	C08313	131.073	5.733	C9 H9 N	131.073	132.08	[M+H]	461.492	747.033	493.943	511.885		434.055	476.566	566.758	750.018
4875	SN-GLYCERO-3-PHOSPHOCHOLINE	-5.67	89.1		257.103	7.735	C8 H20 N O6 P	257.101	258.109	[M+H]	284.196	283.78	297.992	220.302		311.575	288.625	297.775	306.825
4876	SN-GLYCERO-3-PHOSPHOCHOLINE	-5.51	88.7		257.103	8.021	C8 H20 N O6 P	257.101	258.109	[M+H]	1354.26	1190.33	1579.76	1483.24		1341.78	1669.62	1588.1	1532.81
5542	Sphingosine	-5.92	34	C00319	299.282	7.323	C18 H37 N O2	299.281	300.288	[M+H]	283.023	196.745	326.464	184.678		718.585	203.469	247.834	339.176
5543	Sphingosine	-5.37	34.8	C00319	299.282	7.571	C18 H37 N O2	299.281	300.288	[M+H]	1391.59	1256.92	1198.97	1133.52		1268.29	1252.62	1333.61	1554.05
5341	Stearamide	-6.31	81		283.288	14.192	C18 H37 N O	283.286	284.293	[M+H]	189.649	210.702	263.264	273.439		260.604	211.074	167.986	296.621
2913	Suberic acid	3.14	14.3		174.089	5.31	C8 H14 O4	174.09	175.097	[M+H]	34.2904	35.9239	35.9184	36.8662		43.7034	42.9463	41.1241	48.6291
4292	tetradec-5-ynoic acid	-5.01	32.1		224.178	9.035	C14 H24 O2	224.177	225.184	[M+H]	184.911	5.28358	44.2773	6.13814		176.162	38.29	23.0676	328.046
1240	Thymine	-3.34	90	C00178	126.043	1.735	C5 H6 N2 O2	126.043	127.05	[M+H]	179.618	109.353	210.155	61.2277		241.077	290.683	314.535	170.758
2155	Thymol	-5.6	54.7		150.104	11.164	C10 H14 O	150.104	151.111	[M+H]	202.469	75.7199	98.7044	70.4606		203.651	861.871	263.661	186.519
2158	Thymol	-5.19	54.8		150.104	11.391	C10 H14 O	150.104	151.111	[M+H]	61.4355	115.212	321.863	133.207		59.5771	216.773	182.798	348.616
3295	Tributylamine	-4.46	94.8		185.214	5.636	C12 H27 N	185.214	186.221	[M+H]	1721.86	452.104	332.502	856.793		482.523	521.336	434.132	478.389
1655	Trigonelline	-5.5	97.7	C01004	137.048	0.851	C7 H7 N O2	137.047	138.054	[M+H]	646.738	357.131	975.366	1542.03		2819.87	159.04	94.8478	430.96
2470	Tryptamine	-5.11	10.1		160.1	1.759	C10 H12 N2	160.099	161.107	[M+H]	0.685517	0.750898	64.2653	1.50524		0.75772	0.889971	0.875558	0.883689
2496	Tryptophol	-5.85	57.2	C00955	161.084	6.569	C10 H11 N O	161.083	162.09	[M+H]	66.1697	98.5963	82.6951	3489.41		48.2036	41.6296	134.138	52.3481
2497	Tryptophol	-5.79	55	C00955	161.084	6.67	C10 H11 N O	161.083	162.09	[M+H]	121.181	32.9815	82.9522	3260.12		96.3128	42.1207	44.4853	91.9405
1674	Tyramine	-4.46	50.4	C00483	137.084	5.606	C8 H11 N O	137.083	138.091	[M+H]	22.724	22.0102	27.8018	1448.48		21.175	28.4288	27.8672	25.8545
6074	Tyr-Tyr	-4.92	24.1		344.137	3.929	C18 H20 N2 O5	344.136	345.143	[M+H]	9.81639	57.1121	42.3425	4.91398		40.8228	47.4669	44.5149	41.461
741	Uracil	-1.91	88.9	C00106	112.027	1.31	C4 H4 N2 O2	112.027	113.034	[M+H]	113.036	27.7357	77.9928	140.252		18.9477	58.562	54.5736	15.7918
1706	Veratrole	-4.61	66.9		138.068	5.325	C8 H10 O2	138.067	139.075	[M+H]	103.607	242.011	90.3007	173.014		45.2148	141.944	181.938	93.8877
2238	Xanthine	-6.15	44.2		152.033	1.298	C5 H4 N4 O2	152.032	153.04	[M+H]	141.478	2.99696	63.1551	2.49983		10.3809	3.57486	4.10704	3.27346

## Sheet: Negative mode raw data
id	MS2.name	MS2.ppm	MS2.score	KEGG.ID	Monoisotopic.Molecular.Weight	RT.[min]	Formula	Molecular.Weight	m/z	Reference Ion	1_N	50_N	a_N	J2_N	C5_N	C9_N	C10_N	C18_N
200	4-Methylcatechol	-8.01	85.2		124.052	2.868	C7 H8 O2	124.051	123.044	[M-H]	3.76807e+06	910589	795586	334593	430687	470246	622194	239782
895	Aesculetin	-2.79	88.4		178.027	4.377	C9 H6 O4	178.026	177.019	[M-H]	1.72368e+06	1.70976e+06	7.52097e+06	917348	127791	145941	229341	128982
896	Aesculetin	-2.36	78.7		178.027	4.151	C9 H6 O4	178.026	177.019	[M-H]	7.48702e+06	1.09143e+06	3.67996e+06	728880	3.35714e+06	3.75647e+06	6.98983e+06	1.4217e+06
930	Caffeic acid	-2.77	97.8	C01197	180.042	4.361	C9 H8 O4	180.042	179.034	[M-H]	1.23864e+07	276149	414785	5.82019e+06	782176	243068	235626	198215
931	Caffeic acid	-2.74	98.2	C01197	180.042	4.159	C9 H8 O4	180.042	179.034	[M-H]	5.51805e+08	7.35688e+06	5.64572e+06	2.22523e+07	2.13726e+07	1.82108e+06	635204	522639
937	Caffeic acid	-2.51	90.1	C01197	180.042	3.966	C9 H8 O4	180.042	179.035	[M-H]	329925	366029	339392	4.39861e+06	446336	415367	606008	522639
106	Catechol	-9.38	99.1	C01785	110.037	4.025	C6 H6 O2	110.036	109.028	[M-H]	3.54602e+06	622156	5.81909e+06	1.58342e+06	1.04961e+06	1.06746e+06	7.06894e+06	842953
1479	Divaricatinic acid	-0.72	12.2		210.089	5.766	C11 H14 O4	210.089	209.082	[M-H]	4.92764e+06	636783	2.6116e+06	60834.4	328810	27737.1	40495.5	553331
1007	Epinephrine	-2.95	90.4	C00788	183.09	5.604	C9 H13 N O3	183.089	182.082	[M-H]	313878	236137	222443	1.25138e+09	1.68365e+06	1.04596e+06	714368	487968
1182	Ferulic acid	-1.52	95.2	C01494	194.058	5.033	C10 H10 O4	194.058	193.05	[M-H]	2.36859e+07	1.48039e+07	2.71092e+07	433676	2.05086e+06	1.30369e+06	1.01081e+06	1.15013e+06
1186	Ferulic acid	-1.32	93.2	C01494	194.058	5.197	C10 H10 O4	194.058	193.05	[M-H]	3.86836e+06	1.67932e+06	1.58967e+06	197950	675114	443638	712439	134932
783	Gallic acid	-3.29	80.8	C01424	170.022	4.178	C7 H6 O5	170.021	169.014	[M-H]	388449	57753.1	716826	1.60193e+06	41359.9	24539.1	1.02964e+06	17775.5
517	Gentisic acid	-4.74	96.4	C00628	154.027	4.18	C7 H6 O4	154.026	153.019	[M-H]	2.09606e+06	410911	2.35821e+06	7.2515e+06	523410	286650	5.25328e+06	244502
518	Gentisic acid	-4.74	74.3	C00628	154.027	3.811	C7 H6 O4	154.026	153.019	[M-H]	2.93025e+07	3.14238e+06	4.90483e+06	5.30871e+06	1.45203e+07	4.19816e+06	8.28268e+06	4.01087e+06
1211	Haematommic acid	-1.58	72.1		196.037	3.346	C9 H8 O5	196.037	195.03	[M-H]	2.04532e+07	738581	1.02102e+06	442135	2.12581e+06	1.30576e+06	4.48176e+06	393352
3168	Haematommone	2.35	71.9		314.043	7.084	C16 H10 O7	314.043	313.036	[M-H]	5.18542e+06	544256	274787	50198.1	5.12057e+06	7.32593e+06	815617	1.01007e+06
3169	Haematommone	2.45	72.8		314.043	7.222	C16 H10 O7	314.043	313.036	[M-H]	4.42825e+06	390899	160623	43438.1	4.67184e+06	5.95699e+06	734342	831075
747	Homogentisic acid	-3.56	66.4	C00544	168.042	5.003	C8 H8 O4	168.042	167.034	[M-H]	1.52034e+06	9.14475e+06	7.18644e+06	2.16145e+06	1.10305e+06	830852	885346	610017
750	Homogentisic acid	-3.32	53.2	C00544	168.042	5.369	C8 H8 O4	168.042	167.034	[M-H]	1.792e+06	759540	522120	552550	2.72258e+06	407692	2.58683e+06	357033
971	Homovanillic acid	-2.57	92.3	C05582	182.058	6.998	C9 H10 O4	182.057	181.05	[M-H]	1.74446e+06	1.05667e+06	534780	493227	1.38561e+08	5.56609e+06	2.33936e+06	3.92615e+06
749	Isovanillic acid	-3.5	64.4		168.042	4.539	C8 H8 O4	168.042	167.034	[M-H]	1.54673e+06	793891	2.02858e+06	794179	888681	519521	690870	448361
775	Norepinephrine	-3.23	92.8	C00547	169.074	4.715	C8 H11 N O3	169.073	168.066	[M-H]	54092.5	12850.8	23718.8	1.0096e+07	59594.2	19906.5	20139.9	22305.4
2222	norlichexanthone	1.78	90.3		258.053	7.101	C14 H10 O5	258.053	257.046	[M-H]	53948.4	32929.5	35476.8	4.50241e+07	174547	75983.8	361338	41215.8
2953	Quercetin	1.86	95.2	C00389	302.043	6.193	C15 H10 O7	302.043	301.036	[M-H]	6.87815e+06	793789	2.04941e+06	501455	901297	734807	2.14325e+06	3.90289e+06
2954	Quercetin	1.91	92.4	C00389	302.043	6.284	C15 H10 O7	302.043	301.036	[M-H]	4.20077e+06	377841	1.28629e+06	501455	806376	571321	1.45025e+06	1.39657e+06
1252	Syringic acid	-1.48	61.9	C10833	198.053	4.808	C9 H10 O5	198.053	197.045	[M-H]	1.37894e+06	18493.2	692182	39232.2	144214	1.46028e+06	2.83087e+06	54741.8
1253	Syringic acid	-1.46	44.3	C10833	198.053	4.276	C9 H10 O5	198.053	197.045	[M-H]	1.64325e+06	314181	700647	223794	352426	362284	358537	318986
2983	Taxifolin	2.82	69.3		304.058	5.096	C15 H12 O7	304.059	303.052	[M-H]	1.3788e+06	378561	501728	701349	377629	500361	889927	330507
504	Vanillin	-4.96	52.9	D00091	152.047	4.366	C8 H8 O3	152.047	151.039	[M-H]	3.79673e+06	1.19327e+06	2.13111e+06	2.51242e+06	3.44745e+06	2.07439e+06	1.90149e+06	1.78465e+06
2323	(±)-Abscisic acid	2.04	88.5		264.136	6.111	C15 H20 O4	264.137	263.129	[M-H]	1.92048e+07	1.49282e+07	1.4953e+07	2.07547e+07	1.63518e+07	9.16201e+06	1.701e+07	1.17238e+07
2324	(±)-Abscisic acid	2.1	78.1		264.136	5.849	C15 H20 O4	264.137	263.129	[M-H]	3.07564e+06	2.31546e+06	3.18199e+06	3.82207e+06	2.51864e+06	1.50611e+06	2.70882e+06	2.53669e+06
1979	(Z)-2-octylpent-2-enedioic acid	1	22.2		242.152	5.266	C13 H22 O4	242.152	241.145	[M-H]	652906	912963	148996	1.43239e+06	206805	102753	113927	117467
1981	(Z)-2-octylpent-2-enedioic acid	1.32	25.9		242.152	5.039	C13 H22 O4	242.152	241.145	[M-H]	386047	667558	208019	1.87672e+06	812735	862479	608953	119184
3442	(Z)-9,12,13-trihydroxyoctadec-15-enoic acid	2.02	85.7		330.241	7.645	C18 H34 O5	330.241	329.234	[M-H]	3.10555e+07	7.47248e+06	1.92097e+07	2.04056e+07	1.33559e+07	1.41023e+07	3.07797e+07	1.64398e+07
1214	1,2-Propanediol, 3-(1,3-benzodioxol-5-yl)-	-1.47	76.9		196.074	4.121	C10 H12 O4	196.073	195.066	[M-H]	498851	557650	1.01189e+06	829134	195958	711009	1.39247e+06	796121
1215	1,2-Propanediol, 3-(1,3-benzodioxol-5-yl)-	-1.28	76.8		196.074	4.477	C10 H12 O4	196.073	195.066	[M-H]	1.60343e+06	425314	629473	540644	120260	720751	1.62761e+06	91415.6
306	1,5,6,7-TETRAHYDRO-4H-INDOL-4-ONE	-6.52	81.6		135.068	4.121	C8 H9 N O	135.068	134.06	[M-H]	2.97153e+06	1.82241e+06	529773	6.57959e+06	1.74629e+06	150689	182778	920501
3096	11(Z)-Eicosenoic acid	2	82.5	C16526	310.287	12.821	C20 H38 O2	310.288	309.281	[M-H]	586957	552383	891231	952004	709489	1.38533e+06	553694	515717
2924	12-Hydroxyoctadecanoic acid	1.29	88.8		300.266	11.665	C18 H36 O3	300.267	299.26	[M-H]	2.73764e+07	1.09555e+07	9.63307e+06	6.13971e+06	1.76527e+08	2.40156e+08	1.52221e+08	8.87765e+07
2799	13(S)-HOTrE	2.23	50	C16316	294.219	9.699	C18 H30 O3	294.22	293.213	[M-H]	2.42201e+06	1.41196e+07	1.54033e+07	1.97161e+06	1.48244e+06	2.42406e+06	2.15871e+06	4.1248e+06
2458	16-Hydroxyhexadecanoic acid	2	98.3	C18218	272.235	10.432	C16 H32 O3	272.236	271.228	[M-H]	1.34791e+07	5.54232e+06	5.79927e+06	4.02691e+06	2.68886e+07	7.16484e+07	6.70139e+07	2.37107e+07
2459	16-Hydroxyhexadecanoic acid	2.15	98.2	C18218	272.235	10.223	C16 H32 O3	272.236	271.228	[M-H]	3.5111e+06	1.42963e+06	2.16361e+06	2.92376e+06	6.82888e+06	1.99759e+07	1.11062e+07	6.48873e+06
725	1-Methylxanthine	-3.97	30.4		166.049	2.55	C6 H6 N4 O2	166.048	165.041	[M-H]	1.09402e+06	827834	936027	1.11651e+06	2.27106e+06	2.09495e+06	2.96302e+06	481541
519	2,3-Dihydroxybenzoic acid	-4.71	92.4	C00196	154.027	2.968	C7 H6 O4	154.026	153.019	[M-H]	522019	193875	551069	1.53042e+06	3.37048e+06	1.03802e+06	2.1421e+06	279427
1512	2,4,5-trimethoxybenzoic acid	-0.4	37.6		212.068	4.278	C10 H12 O5	212.068	211.061	[M-H]	834392	1.78955e+06	481419	764013	511329	348563	666857	257729
525	2,6-Dihydroxy-4-Methoxytoluene	-5.01	79.1		154.063	4.771	C8 H10 O3	154.062	153.055	[M-H]	2.45346e+07	1.78692e+06	1.51241e+07	1.14144e+06	8.80623e+06	1.79183e+07	9.44369e+07	9.02353e+06
2116	2,6-Di-tert-butyl-4-nitrophenol	1.05	91.3		251.152	11.593	C14 H21 N O3	251.152	250.145	[M-H]	7.40023e+06	8.32284e+06	9.91558e+06	8.43322e+06	8.20366e+06	8.17418e+06	9.99082e+06	8.29336e+06
506	2-Anisic acid	-4.82	73.3		152.047	3.572	C8 H8 O3	152.047	151.039	[M-H]	1.82239e+06	2.12585e+06	2.51121e+06	1.89732e+06	3.18445e+06	1.54147e+06	1.7695e+06	3.05832e+06
114	2-Furoic acid	-8.8	18.4		112.016	0.876	C5 H4 O3	112.015	111.008	[M-H]	428477	846757	399523	3.19552e+06	372297	719465	440541	786911
158	2-Hydroxy-3-methylbutyric acid	-8.42	70.7		118.063	2.904	C5 H10 O3	118.062	117.055	[M-H]	2.09666e+06	1.6525e+06	2.20186e+06	2.78084e+06	1.95445e+06	1.44654e+06	1.55193e+06	1.51604e+06
159	2-Hydroxy-3-methylbutyric acid	-8.34	64.1		118.063	2.552	C5 H10 O3	118.062	117.055	[M-H]	1.35637e+06	958860	1.30678e+06	2.42864e+06	927757	971382	981002	1.12241e+06
493	2-hydroxyacetanilide	-4.89	76.9		151.063	4.278	C8 H9 N O2	151.063	150.055	[M-H]	339398	3.01988e+06	2.39527e+06	2.71185e+06	1.45688e+06	1.01234e+06	1.63769e+06	606602
490	2-Hydroxybenzothiazole	-4.95	90.4		151.009	4.83	C7 H5 N O S	151.008	150.001	[M-H]	2.14721e+06	2.33507e+06	2.5166e+06	3.53601e+06	2.6718e+06	2.60935e+06	2.82077e+06	3.25057e+06
202	2-Hydroxybenzyl alcohol	-7.94	95.7	C02323	124.052	3.458	C7 H8 O2	124.051	123.044	[M-H]	5.55242e+07	511776	1.39049e+07	9.66023e+06	2.4772e+07	4.47725e+06	8.36322e+06	2.31562e+06
668	2-Hydroxycinnamic acid	-3.71	81.1		164.047	5.477	C9 H8 O3	164.047	163.039	[M-H]	470137	291376	1.53715e+06	440240	355530	404033	2.121e+06	398524
671	2-Hydroxycinnamic acid	-3.61	82.2	C01772	164.047	5.081	C9 H8 O3	164.047	163.039	[M-H]	3.0759e+06	914157	1.20978e+07	1.1089e+07	765262	364815	696102	894270
673	2-Hydroxycinnamic acid	-3.43	80	C01772	164.047	5.175	C9 H8 O3	164.047	163.04	[M-H]	3.0759e+06	2.25018e+06	1.11613e+07	7.46341e+06	539730	364815	696102	572624
282	2-Hydroxyisocaproic acid	-6.71	50.3		132.079	3.666	C6 H12 O3	132.078	131.07	[M-H]	1.73233e+06	1.4312e+06	1.63556e+06	2.13421e+06	3.81025e+06	1.64198e+06	1.50931e+06	1.02146e+06
611	2-HYDROXYOCTANOIC ACID	-4.04	39.7		160.11	4.705	C8 H16 O3	160.109	159.102	[M-H]	462047	2.12605e+06	521345	531888	1.21565e+06	317159	411953	377655
612	2-HYDROXYOCTANOIC ACID	-4.04	38.9		160.11	5.083	C8 H16 O3	160.109	159.102	[M-H]	766598	1.23209e+06	691014	640170	1.35225e+06	557968	869169	443550
157	2-Hydroxyvaleric acid	-8.87	81.1		118.063	3.345	C5 H10 O3	118.062	117.055	[M-H]	1.28197e+07	2.62714e+06	3.78808e+06	1.52341e+07	6.64029e+06	2.66453e+06	3.87111e+06	2.39424e+07
876	2-Isopropylmalic acid	-3.39	36.7	C02504	176.068	3.724	C7 H12 O5	176.068	175.061	[M-H]	1.16407e+07	1.96569e+06	552326	1.3384e+07	553041	1.30798e+06	1.33834e+06	1.09396e+06
898	2-Methoxycinnamic acid	-3.21	66.4		178.063	4.941	C10 H10 O3	178.062	177.055	[M-H]	1.93037e+06	1.12227e+06	869474	377060	323998	279818	369835	359318
901	2-Methoxycinnamic acid	-2.7	60.1		178.063	4.472	C10 H10 O3	178.063	177.055	[M-H]	450581	304303	973643	1.87035e+07	221579	241856	276271	257216
160	2-Methyl-3-hydroxybutyric acid	-8.27	30.2		118.063	2.298	C5 H10 O3	118.062	117.055	[M-H]	2.13827e+06	1.44524e+06	1.19202e+06	4.9449e+06	1.32763e+06	1.15506e+06	1.38252e+06	1.33999e+06
431	2-Methylglutaric acid	-5.32	63.1	C05282	146.058	2.023	C6 H10 O4	146.057	145.05	[M-H]	2.8922e+07	8.68133e+06	1.15385e+07	3.77267e+07	2.96792e+07	7.86819e+06	7.87298e+06	5.98051e+06
1169	2-Methylhippuric acid	-1.75	61.7		193.074	4.044	C10 H11 N O3	193.074	192.066	[M-H]	4.25733e+06	2.40785e+06	2.7574e+06	219687	340217	1.82627e+06	1.91938e+06	230142
1170	2-Methylhippuric acid	-1.72	28.2		193.074	3.486	C10 H11 N O3	193.074	192.066	[M-H]	763099	89441.9	635665	285017	206243	169553	157995	135098
1171	2-Methylhippuric acid	-1.67	47		193.074	3.784	C10 H11 N O3	193.074	192.066	[M-H]	3.23847e+06	3.37153e+06	1.32814e+07	1.04609e+07	5.33441e+06	8.0446e+06	1.11545e+07	6.80459e+06
69	2-Oxobutyric acid	-10.87	42.1		102.032	0.816	C4 H6 O3	102.031	101.023	[M-H]	8.03849e+06	1.15882e+07	4.88778e+06	2.58387e+07	5.18012e+06	7.42973e+06	7.48564e+06	5.7639e+06
2247	2-Thiocytidine	-3.81	74.1		259.063	3.803	C9 H13 N3 O4 S	259.062	258.054	[M-H]	126587	104531	309521	10383.4	20334.1	91544.8	73053.9	8122.52
746	3,4-Dihydroxyphenylacetic acid	-3.61	77.5	C01161	168.042	3.459	C8 H8 O4	168.042	167.034	[M-H]	3.1655e+06	582877	868180	904368	1.55859e+06	2.03055e+06	578759	323524
486	3,4-Dimethylbenzoic acid	-5.06	32.2		150.068	4.758	C9 H10 O2	150.067	149.06	[M-H]	789608	471733	1.19973e+06	305903	296085	252331	280660	253382
1373	3,5-dihydroxydecanoic acid	-0.93	48.2		204.136	4.779	C10 H20 O4	204.136	203.129	[M-H]	326630	194831	138354	1.25454e+06	125317	34634.9	75012.4	90834.8
1374	3,5-dihydroxydecanoic acid	-0.85	62.6		204.136	4.659	C10 H20 O4	204.136	203.129	[M-H]	126304	199389	123399	1.24957e+06	106664	58873.7	46983.7	57186.3
972	3,5-Dimethoxybenzoic acid	-2.51	55.7		182.058	4.001	C9 H10 O4	182.057	181.05	[M-H]	9.06906e+06	6.18725e+06	3.17085e+06	1.0869e+06	709328	858621	2.14759e+06	509446
186	3-Ethylphenol	-8.01	24.9		122.073	5.512	C8 H10 O	122.072	121.065	[M-H]	27701.3	17093	18675.6	36520.7	18223.3	16956	33168.1	3.18404e+06
636	3-Hydroxy-3-methylglutaric acid	-4.23	43.9		162.053	1.3	C6 H10 O5	162.052	161.045	[M-H]	808036	868148	697979	1.6674e+06	862415	780318	754744	747637
638	3-Hydroxy-3-methylglutaric acid	-4.01	34.7	C03761	162.053	1.683	C6 H10 O5	162.052	161.045	[M-H]	2.34525e+06	2.54926e+06	1.69931e+06	9.69058e+06	1.9729e+06	2.02519e+06	1.79944e+06	1.92723e+06
513	3-Hydroxyanthranilic acid	-4.74	85.2	C00632	153.043	2.781	C7 H7 N O3	153.042	152.035	[M-H]	3.72925e+06	3.75344e+06	3.54472e+06	5.98918e+06	4.07207e+06	3.86612e+06	3.99835e+06	4.06336e+06
88	3-HYDROXYBUTANOIC ACID	-10.4	69.2		104.047	1.698	C4 H8 O3	104.046	103.039	[M-H]	1.72042e+07	2.67349e+06	8.7995e+06	1.16691e+08	7.25382e+06	1.07969e+07	3.44822e+06	4.9846e+06
503	3-Hydroxyphenylacetic acid	-5.37	81.5	C05593	152.047	4.687	C8 H8 O3	152.047	151.039	[M-H]	5.37775e+08	4.72639e+06	8.51417e+07	5.92234e+06	3.61812e+08	9.60932e+07	6.75472e+07	8.27415e+07
380	3-Hydroxypicolinic acid	-5.8	87.8	C18620	139.027	1.79	C6 H5 N O3	139.026	138.019	[M-H]	1.70652e+07	1.67339e+07	1.6967e+07	1.94207e+07	1.84552e+07	1.73728e+07	1.80501e+07	1.82362e+07
729	3-Methoxyphenylacetic acid	-3.81	86.5		166.063	5.513	C9 H10 O3	166.062	165.055	[M-H]	715193	1.06355e+06	605573	999768	765497	519821	777672	2.49839e+07
444	3-METHYL-2-OXINDOLE	-5.36	39.9		147.068	4.312	C9 H9 N O	147.068	146.06	[M-H]	239388	12705.6	354306	305633	39635	45140.9	77263.7	1.69099e+06
429	3-Methylglutaric acid	-5.81	83.5		146.058	3.299	C6 H10 O4	146.057	145.05	[M-H]	2.68529e+06	7.33289e+06	3.35441e+06	9.55677e+06	3.46467e+06	3.23555e+06	4.05628e+06	5.32493e+06
430	3-Methylglutaric acid	-5.46	97.6		146.058	3.436	C6 H10 O4	146.057	145.05	[M-H]	1.16243e+06	984043	760724	6.20605e+06	1.0223e+06	830914	845438	947313
2224	3'-O-Methyluridine	1.78	38.8		258.085	2.367	C10 H14 N2 O6	258.086	257.078	[M-H]	429042	424972	584902	3.16091e+06	151542	116683	192775	23118.3
726	3-Phenyllactic acid	-4.01	97	C05607	166.063	4.935	C9 H10 O3	166.062	165.055	[M-H]	8.9067e+07	2.06142e+08	4.93431e+07	1.45749e+08	4.74991e+07	6.755e+06	1.21422e+07	7.6135e+06
1038	3-Phosphoglyceric acid	-10.09	42.6	C00597	185.993	14.136	C3 H7 O7 P	185.991	184.984	[M-H]	7.77325e+06	6.51798e+06	7.36184e+06	7.31581e+06	6.36357e+06	7.28705e+06	7.00582e+06	7.42141e+06
416	4-Acetamidobutanoic acid	-5.37	49.7	C02946	145.074	1.792	C6 H11 N O3	145.073	144.066	[M-H]	3.53643e+06	1.14156e+06	1.14706e+06	4.83318e+07	1.50339e+06	1.63896e+06	446035	1.51787e+06
351	4-Aminobenzoic acid	-6.17	88.5	C00568	137.048	4.014	C7 H7 N O2	137.047	136.04	[M-H]	1.378e+06	1.61621e+06	2.24088e+06	627377	1.0686e+06	2.03151e+06	3.26132e+06	2.32768e+06
104	4-Aminophenol	-9.48	64.5		109.053	4.277	C6 H7 N O	109.052	108.044	[M-H]	540248	1.01251e+06	902002	1.01203e+06	57186.4	205408	504560	170095
507	4-Anisic acid	-4.77	74.9	C02519	152.047	3.703	C8 H8 O3	152.047	151.039	[M-H]	1.82239e+06	1.07014e+06	7.69256e+06	1.11631e+06	1.23334e+06	1.19519e+06	1.7695e+06	1.18951e+06
666	4-Coumaric acid	-3.73	38.6	C00811	164.047	3.47	C9 H8 O3	164.047	163.039	[M-H]	1.20118e+06	551877	731017	2.68216e+06	581753	321064	345124	352708
3366	4-Dodecylbenzenesulfonic acid	1.35	91.4		326.192	14.278	C18 H30 O3 S	326.192	325.185	[M-H]	6.89537e+07	8.52731e+07	6.47754e+07	4.37604e+07	4.88654e+07	6.215e+07	6.11007e+07	8.30551e+07
1395	4-hydroxy-3-(3-methylbut-2-enyl)benzoic acid	-0.69	37		206.094	6.989	C12 H14 O3	206.094	205.087	[M-H]	4.46952e+06	72701.1	2.1928e+06	70794.8	115609	3.11123e+06	6.16952e+06	2.06176e+06
1396	4-hydroxy-3-(3-methylbut-2-enyl)benzoic acid	-0.65	32.3		206.094	7.385	C12 H14 O3	206.094	205.087	[M-H]	2.50992e+06	219187	1.57053e+06	56325.5	104538	2.66275e+06	3.95554e+06	1.69463e+06
215	4-Hydroxy-6-methyl-2-pyrone	-7.41	99.4	C02752	126.032	3.582	C6 H6 O3	126.031	125.023	[M-H]	631426	497220	525957	2.51923e+06	488161	459797	518232	524556
201	4-Hydroxybenzyl alcohol	-7.99	93.7	C17467	124.052	3.214	C7 H8 O2	124.051	123.044	[M-H]	1.30386e+06	242350	879337	2.46844e+06	1.20455e+06	2.45638e+06	1.09739e+07	626740
89	4-Hydroxybutyric acid	-10.19	48.3	C00989	104.047	1.372	C4 H8 O3	104.046	103.039	[M-H]	1.00904e+07	1.22953e+06	3.1213e+06	9.0853e+06	2.20967e+06	759743	866336	1.03177e+06
739	4-Hydroxyphenylglycine	-3.32	40.8		167.058	4.146	C8 H9 N O3	167.058	166.05	[M-H]	1.31785e+06	3.07416e+06	3.06184e+06	5.18847e+06	3.14823e+06	3.06843e+06	3.17128e+06	1.4709e+06
936	4-Hydroxyphenylpyruvic acid	-2.51	24		180.042	6.213	C9 H8 O4	180.042	179.035	[M-H]	413266	672187	5.51331e+06	2.38117e+06	974827	152656	109225	733256
938	4-Hydroxyphenylpyruvic acid	-2.51	16.4		180.042	6.312	C9 H8 O4	180.042	179.035	[M-H]	1.1403e+06	482989	4.99475e+06	740185	577599	409138	415510	361855
249	4-methyl-2-oxopentanoic acid	-7	33.3		130.063	3.544	C6 H10 O3	130.062	129.055	[M-H]	9.3602e+06	5.9723e+06	3.30229e+06	1.20017e+07	8.69783e+06	8.44508e+06	9.62379e+06	1.03458e+07
251	4-methyl-2-oxopentanoic acid	-6.75	36		130.063	3.862	C6 H10 O3	130.062	129.055	[M-H]	8.85491e+06	7.51326e+07	2.93893e+06	8.37169e+06	1.16623e+07	3.79211e+06	3.30038e+06	1.76059e+06
99	4-Methylphenol	-9.62	99	C01468	108.058	5.959	C7 H8 O	108.056	107.049	[M-H]	575014	184066	2.38422e+06	83453.4	2.88356e+06	94480.2	41369.8	131840
101	4-Methylphenol	-9.58	98.4	C01468	108.058	5.737	C7 H8 O	108.056	107.049	[M-H]	1.09005e+06	215025	1.47452e+06	25332	5.86838e+06	94480.2	98810.7	243371
239	4-Oxoproline	-7.44	98.8	C01877	129.043	1.297	C5 H7 N O3	129.042	128.034	[M-H]	2.45676e+06	2.65616e+07	4.48236e+06	1.71417e+08	4.85446e+06	2.69869e+06	2.19755e+06	3.5415e+06
240	4-Oxoproline	-7.2	98.9	C01877	129.043	0.881	C5 H7 N O3	129.042	128.034	[M-H]	3.40556e+06	3.10546e+07	5.17786e+06	1.86131e+08	5.13979e+06	3.33092e+06	2.8511e+06	4.16595e+06
1006	4-Pyridoxic acid	-2.32	28.8		183.053	3.787	C8 H9 N O4	183.053	182.045	[M-H]	285101	1.37057e+06	187759	753479	227606	279313	246351	113794
328	4-Toluic acid	-6.68	57.3	C01454	136.052	4.159	C8 H8 O2	136.052	135.044	[M-H]	2.82518e+07	2.61399e+06	2.22064e+06	2.12019e+06	2.15995e+06	1.03239e+06	971939	1.16786e+06
168	4-Vinylphenol	-8.38	79.7		120.058	4.71	C8 H8 O	120.057	119.049	[M-H]	430638	360199	1.36714e+06	1.27595e+06	377319	320586	679976	573159
169	4-Vinylphenol	-8.3	75.3		120.058	4.937	C8 H8 O	120.057	119.049	[M-H]	3.17329e+06	6.14992e+06	2.11259e+06	4.08385e+06	1.38671e+06	259937	509833	472520
170	4-Vinylphenol	-8.25	82.1		120.058	4.808	C8 H8 O	120.057	119.049	[M-H]	4.46348e+06	457779	4.5641e+06	1.27595e+06	573947	120714	679976	7.88108e+06
1130	5-Hydroxyindole-3-acetic acid	-1.65	77.2	C05635	191.058	4.513	C10 H9 N O3	191.058	190.051	[M-H]	1.22599e+06	508805	688137	3.59663e+06	320010	169324	378932	3.95857e+06
1131	5-Hydroxyindole-3-acetic acid	-1.44	25		191.058	4.882	C10 H9 N O3	191.058	190.051	[M-H]	4.50298e+06	8.71412e+06	6.62748e+06	8.3369e+06	1.8141e+06	731263	1.25438e+06	952938
675	6-DEOXY-L-GALACTOSE	-3.59	30.3		164.068	0.804	C6 H12 O5	164.068	163.061	[M-H]	154453	411430	98430.2	3.27879e+06	137232	181290	165768	171665
281	6-Hydroxycaproic acid	-6.73	98.5	C06103	132.079	4.437	C6 H12 O3	132.078	131.07	[M-H]	2.03109e+07	2.68573e+07	1.04292e+07	4.37872e+07	2.02857e+07	5.3319e+06	6.60993e+06	1.24246e+07
2058	6-Hydroxymelatonin	1.07	44.5	C05643	248.116	6.998	C13 H16 N2 O3	248.116	247.109	[M-H]	7.69912e+06	31589.2	1.07343e+06	49072.4	1.1554e+07	46790.7	35268.1	5.82979e+06
2059	6-Hydroxymelatonin	1.29	44.5	C05643	248.116	7.123	C13 H16 N2 O3	248.116	247.109	[M-H]	6.9216e+06	29452.4	1.40405e+06	45805.1	8.46959e+06	59158.4	36032.5	4.68526e+06
723	7-Methylxanthine	-11.9	53.9	C16353	166.049	0.818	C6 H6 N4 O2	166.047	165.04	[M-H]	2.95394e+06	5.57897e+06	1.78845e+06	2.33021e+07	1.20982e+06	3.8576e+06	2.17221e+06	5.45847e+06
3030	8Z,11Z,14Z-Eicosatrienoic acid	2.27	78	C03242	306.256	13.388	C20 H34 O2	306.257	305.249	[M-H]	159073	214600	289122	178256	623471	207439	201555	165675
2300	9-(2,3-dihydroxypropoxy)-9-oxononanoic acid	2.05	84.1		262.142	5.091	C12 H22 O6	262.142	261.135	[M-H]	2.13662e+06	2.41546e+06	621809	592800	1.95942e+06	535029	1.09753e+06	1.08844e+06
2849	9-HODE	1.69	97.3		296.235	10.557	C18 H32 O3	296.236	295.228	[M-H]	3.08939e+06	3.13482e+06	7.71166e+06	3.34243e+06	3.47712e+07	5.99269e+06	3.30513e+06	3.19905e+07
3134	9-HpODE	1.94	35.6		312.23	8.538	C18 H32 O4	312.231	311.223	[M-H]	1.30816e+07	3.08266e+07	4.48416e+07	1.20585e+07	1.96707e+07	1.77449e+07	5.97851e+06	1.80334e+07
3138	9-HpODE	2.21	73.6		312.23	8.288	C18 H32 O4	312.231	311.223	[M-H]	9.68771e+06	3.56376e+07	4.80814e+07	2.58616e+06	7.52466e+06	2.1834e+07	2.60131e+07	8.95232e+06
3139	9-HpODE	2.26	73.3		312.23	8.025	C18 H32 O4	312.231	311.223	[M-H]	1.69372e+07	3.33296e+07	3.91503e+07	1.6577e+07	1.55495e+07	1.96626e+07	2.34131e+07	1.7449e+07
1753	9-methoxycarbonyldec-9-enoic acid	0.31	24.2		228.136	4.657	C12 H20 O4	228.136	227.129	[M-H]	1.43099e+06	676805	523667	3.30945e+06	638554	313675	453116	512026
1755	9-methoxycarbonyldec-9-enoic acid	0.37	19.6		228.136	4.182	C12 H20 O4	228.136	227.129	[M-H]	433199	774217	793586	1.20401e+06	300577	872528	868680	806509
2966	Abietic acid	1.65	84.8		302.225	12.336	C20 H30 O2	302.225	301.218	[M-H]	2.07024e+06	832576	2.83059e+06	2.97017e+06	1.11676e+07	2.02225e+06	820778	821784
1	Acrylic acid	-17.47	99.9	C00511	72.0211	0.801	C3 H4 O2	72.0199	71.0126	[M-H]	326720	5.00055e+06	378188	1.34204e+07	478982	474074	402783	401941
3394	Aflatoxin G1	2.19	42.7	C16755	328.058	8.64	C17 H12 O7	328.059	327.052	[M-H]	5.23566e+06	637712	135336	83831.2	3.75175e+06	4.61258e+06	819826	172890
1872	Ala-Phe	0.51	69.3		236.116	7.158	C12 H16 N2 O3	236.116	235.109	[M-H]	1.70636e+08	582026	5.93565e+07	308589	1.01755e+08	814308	1.55001e+06	5.85794e+07
2997	Aleuretic Acid	2.12	87.3		304.225	6.335	C16 H32 O5	304.226	303.218	[M-H]	708806	4.61723e+06	425432	3.73625e+06	98552.6	86727.1	1.16599e+06	105590
584	Allantoin	-4.26	61.6		158.044	0.838	C4 H6 N4 O3	158.043	157.036	[M-H]	554509	1.08548e+07	7.79035e+06	1.20936e+06	405150	270390	291330	144255
1196	alpha-Hydroxyhippuric acid	-1.64	35.1		195.053	3.915	C9 H9 N O4	195.053	194.046	[M-H]	4.53277e+06	7.20365e+06	3.31932e+06	3.1413e+07	1.03863e+06	306802	1.49386e+06	814093
2526	alpha-Linolenic acid	1.61	95.1		278.225	12.446	C18 H30 O2	278.225	277.218	[M-H]	4.10302e+06	5.70481e+06	1.34595e+07	2.99031e+06	4.10222e+06	5.57256e+06	8.44433e+06	5.48296e+06
2527	alpha-Linolenic acid	1.63	92.6		278.225	12.702	C18 H30 O2	278.225	277.218	[M-H]	585282	231765	411200	105109	2.56626e+06	1.66836e+06	709628	2.92166e+06
344	Anthranilic acid	-6.46	99	C00108	137.048	4.973	C7 H7 N O2	137.047	136.04	[M-H]	7.06063e+07	1.25723e+06	1.14423e+08	1.21345e+06	644860	470686	1.16531e+06	1.69228e+06
349	Anthranilic acid	-6.25	96.1	C00108	137.048	4.849	C7 H7 N O2	137.047	136.04	[M-H]	4.69385e+06	1.25723e+06	7.24829e+06	1.21345e+06	242610	470686	402972	552455
3141	Arachidic acid	1.98	97	C06425	312.303	12.756	C20 H40 O2	312.303	311.296	[M-H]	903751	1.18805e+06	1.47792e+06	1.1855e+06	235972	378921	646716	948522
1075	Azelaic acid	-2.02	98	C08261	188.105	5.452	C9 H16 O4	188.104	187.097	[M-H]	1.9003e+08	6.83526e+07	1.66774e+07	4.03099e+07	5.13796e+07	1.08091e+07	2.16098e+07	2.03461e+07
183	Benzoic acid	-8.05	93.8	C00180	122.037	4.618	C7 H6 O2	122.036	121.029	[M-H]	5.08824e+07	3.30948e+07	7.31145e+07	4.96932e+07	5.94968e+07	2.01927e+07	2.48814e+07	4.53874e+07
184	Benzoic acid	-7.81	64.2	C00180	122.037	4.365	C7 H6 O2	122.036	121.029	[M-H]	9.98806e+06	5.21763e+06	5.65779e+06	8.1687e+06	1.00945e+07	6.77907e+06	5.67539e+06	8.56522e+06
2015	beta-Hydroxymyristic acid	0.92	22.7		244.204	8.921	C14 H28 O3	244.204	243.197	[M-H]	2.41497e+06	930641	1.27162e+06	557181	2.05573e+06	3.34992e+06	1.97077e+06	3.62112e+06
266	Beta-Leucine	-7.02	35.4	C02486	131.095	1.476	C6 H13 N O2	131.094	130.086	[M-H]	1.53742e+06	1.19414e+06	1.26624e+06	2.61423e+06	1.2103e+06	902239	762446	784624
1330	Capryloylglycine	-1.16	63.9		201.136	4.221	C10 H19 N O3	201.136	200.129	[M-H]	106832	11004.4	2.37216e+06	12606.1	43494.1	23712.8	11005.8	272417
244	Citraconic acid	-7.86	23.3		130.027	1.298	C5 H6 O4	130.026	129.018	[M-H]	1.39725e+06	1.05196e+06	829391	4.34773e+06	1.36267e+06	441871	431407	668838
246	Citraconic acid	-7.03	35.1	C01732	130.027	1.006	C5 H6 O4	130.026	129.018	[M-H]	1.47753e+06	1.24468e+06	1.36967e+06	3.02218e+06	1.90703e+06	540329	611590	517166
466	Citramalic acid	-5.41	65.2		148.037	1.483	C5 H8 O5	148.036	147.029	[M-H]	1.43118e+06	1.39034e+06	1.20401e+06	1.90641e+06	1.22319e+06	1.55834e+06	1.66544e+06	1.95854e+06
1136	Citric acid	-1.8	44.6	C00158	192.027	1.3	C6 H8 O7	192.027	191.019	[M-H]	8.02285e+06	2.19877e+06	3.95192e+06	6.74345e+07	3.86273e+06	4.05724e+06	3.23759e+06	7.99713e+06
1137	Citric acid	-1.79	93.6	C00158	192.027	0.875	C6 H8 O7	192.027	191.019	[M-H]	6.62381e+06	1.3184e+06	3.05018e+06	4.52075e+07	1.28676e+06	3.08218e+06	1.66289e+06	6.18359e+06
1989	Cytidine	8.15	42.8	C00475	243.086	0.784	C9 H13 N3 O5	243.088	242.08	[M-H]	2.29542e+06	1.90666e+06	2.43399e+06	2.93783e+06	7.22296e+06	1.88585e+06	1.87643e+06	1.83325e+06
467	D-2-Hydroxyglutaric acid	-5.39	59.4	C01087	148.037	1.298	C5 H8 O5	148.036	147.029	[M-H]	952678	507969	1.03985e+06	1.18011e+07	5.02773e+06	232429	1.66544e+06	383380
468	D-2-Hydroxyglutaric acid	-5.24	53.5	C01087	148.037	0.873	C5 H8 O5	148.036	147.029	[M-H]	1.9067e+06	1.42641e+06	1.68728e+06	1.62888e+07	5.58323e+06	825719	939931	1.11836e+06
940	D-Fructose	-2.55	69.4	C02336	180.063	0.804	C6 H12 O6	180.063	179.056	[M-H]	4.12401e+06	6.09654e+07	2.32458e+06	1.8054e+08	2.54354e+06	4.22661e+06	2.78576e+06	6.80543e+06
435	D-Glutamine	-5.12	61.2		146.069	0.777	C5 H10 N2 O3	146.068	145.061	[M-H]	1.24799e+06	1.07384e+06	1.38605e+06	1.94074e+06	4.01214e+06	1.1762e+06	1.01101e+06	1.23848e+06
1518	Dihydrojasmonic Acid	-0.47	45.9		212.141	6.684	C12 H20 O3	212.141	211.134	[M-H]	8.34692e+06	3.17161e+06	4.50096e+06	3.76923e+06	9.93087e+06	5.18988e+06	5.39805e+06	5.38496e+06
1016	DIHYDROXYMANDELIC ACID	-2.43	59.3		184.037	2.921	C8 H8 O5	184.037	183.029	[M-H]	77766.1	307906	2.73892e+06	70995	36768.8	25520.7	26914.4	24608.8
501	DL-Mandelic acid	-5.76	77		152.047	0.88	C8 H8 O3	152.046	151.039	[M-H]	2.70987e+06	4.73116e+06	2.05578e+06	1.79923e+06	2.19052e+06	2.9657e+06	2.79924e+06	2.04471e+06
505	DL-Mandelic acid	-4.93	80.7		152.047	1.424	C8 H8 O3	152.047	151.039	[M-H]	4.18652e+06	2.1644e+06	1.15175e+06	2.17004e+06	2.02749e+06	2.56351e+06	2.44913e+06	2.14923e+06
3409	Docosahexaenoic Acid	1.82	87.2		328.24	12.736	C22 H32 O2	328.241	327.234	[M-H]	1.27393e+06	1.06887e+06	1.57791e+06	1.47064e+06	5.2517e+06	1.80721e+06	1.22281e+06	1.45326e+06
3473	Docosatetraenoic acid	1.65	60		332.272	13.682	C22 H36 O2	332.272	331.265	[M-H]	82290	53795.6	100938	97291.6	609986	116509	57378	52946.3
1792	Dodecanedioic acid	0.49	67.9	C02678	230.152	5.801	C12 H22 O4	230.152	229.145	[M-H]	2.01231e+06	1.97693e+06	1.705e+06	7.57363e+06	1.84829e+06	1.78833e+06	1.41753e+06	2.23951e+06
283	D-ORNITHINE	-6.74	18.8		132.09	0.689	C5 H12 N2 O2	132.089	131.082	[M-H]	136433	75443.5	198904	1.30379e+06	305415	116845	76045.1	91562.9
1145	D-Quinic acid	-1.97	43	C00296	192.063	0.844	C7 H12 O6	192.063	191.056	[M-H]	810020	759582	1.26932e+06	7.28863e+06	747559	735243	1.02812e+06	1.33937e+06
485	D-RIBOSE	-5.28	37.6		150.053	0.818	C5 H10 O5	150.052	149.045	[M-H]	485779	1.13095e+06	883090	6.80901e+06	985489	569593	398642	936662
1786	D-ribose 5-phosphate	0.31	71.7		230.019	5.082	C5 H11 O8 P	230.019	229.012	[M-H]	13822.3	13448.6	13165.7	5.50665e+06	21262.9	14144.4	14480.5	13434.9
2662	D-Salicin	2.23	38.1	C01451	286.105	4.533	C13 H18 O7	286.106	285.099	[M-H]	42277.4	10011.2	14742.4	11240.1	802312	7.40426e+06	1.32109e+07	32369.4
3065	Eicosadienoic acid	1.62	96.5		308.272	14.166	C20 H36 O2	308.272	307.265	[M-H]	933062	538052	1.3076e+06	1.0097e+06	3.50313e+06	772027	403776	542315
3066	Eicosadienoic acid	1.97	84.2		308.272	14.396	C20 H36 O2	308.272	307.265	[M-H]	392943	347885	239135	205832	1.04512e+06	257338	240348	174432
1896	ethyl 2-(2-acetyl-3,5-dihydroxyphenyl)acetate	0.83	64.2		238.084	5.564	C12 H14 O5	238.084	237.077	[M-H]	226012	686821	3.46569e+06	512391	34182.4	128876	186511	411118
1694	FA 13:3+1O	0.01	59		224.141	8.357	C13 H20 O3	224.141	223.134	[M-H]	5.39885e+06	1.3166e+06	1.25135e+07	1.49342e+06	7.65404e+06	8.1273e+06	1.35936e+07	6.79845e+07
2131	FA 16:2	1.22	89.8		252.209	12.098	C16 H28 O2	252.209	251.202	[M-H]	580858	320422	460451	133147	618164	1.75837e+06	1.50102e+06	953931
2415	FA 17:0	1.49	91.5		270.256	14.194	C17 H34 O2	270.256	269.249	[M-H]	811056	1.15806e+06	895691	625719	847944	455819	829231	821906
2416	FA 17:0	1.57	87.3		270.256	14.449	C17 H34 O2	270.256	269.249	[M-H]	1.48165e+06	1.33881e+06	1.67722e+06	1.5607e+06	2.07879e+06	1.22409e+06	1.21706e+06	1.54619e+06
3443	FA 18:1+3O	2.05	89.4		330.241	7.059	C18 H34 O5	330.241	329.234	[M-H]	2.40663e+07	2.7651e+07	2.4609e+07	1.6745e+08	1.92654e+07	1.44198e+07	3.25164e+07	1.84968e+07
3135	FA 18:2+2O	1.96	36.2		312.23	10.874	C18 H32 O4	312.231	311.223	[M-H]	9.2381e+06	2.28009e+06	7.37349e+06	1.26252e+06	5.30824e+06	3.74628e+06	1.54233e+06	7.86894e+06
3403	FA 18:2+3O	1.94	67.6		328.225	6.609	C18 H32 O5	328.226	327.218	[M-H]	5.35685e+06	1.89715e+07	5.37709e+07	2.95522e+07	9.72371e+06	3.95432e+06	6.26206e+06	6.69871e+06
3618	FA 18:2+4O	1.8	75.8		344.22	5.733	C18 H32 O6	344.221	343.213	[M-H]	4.48882e+06	5.39185e+06	5.10803e+06	2.64293e+07	5.81725e+06	1.60747e+06	2.62936e+06	2.96745e+06
3619	FA 18:2+4O	1.86	69.7		344.22	5.94	C18 H32 O6	344.221	343.213	[M-H]	4.81293e+06	1.44772e+07	1.77448e+07	1.17657e+07	3.95924e+06	1.10888e+06	1.36442e+06	2.57069e+06
3620	FA 18:2+4O	1.87	74		344.22	5.507	C18 H32 O6	344.221	343.213	[M-H]	5.72489e+06	8.48443e+06	2.93167e+06	2.64293e+07	2.94995e+06	806841	1.31966e+06	1.47329e+06
3094	FA 18:3+2O	2.43	73.3		310.214	7.548	C18 H30 O4	310.215	309.208	[M-H]	2.24404e+06	1.65489e+07	5.31488e+06	2.63607e+06	840682	2.52677e+06	2.3948e+06	2.4937e+06
3091	FA 18:4+2O	2.03	71.1		310.214	9.794	C18 H30 O4	310.215	309.208	[M-H]	956510	2.84946e+06	1.24343e+07	1.41105e+06	1.46332e+06	1.89981e+06	2.30607e+06	2.21819e+06
3445	FA 22:5	1.83	80.4		330.256	13.067	C22 H34 O2	330.256	329.249	[M-H]	101630	63185.7	107211	104126	502422	83590.8	57196.5	82502.1
850	FA 9:0+1O	-2.72	80.3		174.126	5.571	C9 H18 O3	174.125	173.118	[M-H]	1.30635e+06	1.2535e+06	2.16756e+06	1.77196e+06	1.23228e+06	2.37155e+06	4.3953e+06	1.08793e+06
851	FA 9:0+1O	-2.7	82.6		174.126	5.992	C9 H18 O3	174.125	173.118	[M-H]	4.8586e+06	737733	1.32483e+08	904945	3.72197e+06	963171	1.61191e+06	6.85389e+06
823	FA 9:1+1O	-3	49.3		172.11	6.1	C9 H16 O3	172.109	171.102	[M-H]	2.66171e+07	4.34885e+07	1.12366e+07	2.16219e+07	2.5512e+07	2.24984e+07	8.87429e+07	1.28109e+07
824	FA 9:1+1O	-2.9	48.1		172.11	6.333	C9 H16 O3	172.109	171.102	[M-H]	2.55987e+07	1.57736e+07	5.21187e+06	1.1868e+07	1.67915e+07	1.40028e+07	5.05065e+06	8.25377e+06
3641	Gibberellic acid	11.46	31.7	C01699	346.142	11.804	C19 H22 O6	346.146	345.138	[M-H]	1.31687e+06	395875	553861	99232.6	995614	137503	50903.1	8.55358e+06
1213	Gluconic acid	-1.79	29.1		196.058	0.812	C6 H12 O7	196.058	195.051	[M-H]	511557	824538	493889	7.33958e+06	1.08418e+06	462828	403169	598598
276	Glutaric acid	-6.61	98.4	C00489	132.042	2.346	C5 H8 O4	132.041	131.034	[M-H]	2.63312e+06	1.31342e+06	1.48935e+06	1.56584e+07	1.17777e+06	1.81075e+06	1.56842e+06	1.87337e+06
816	Glycerol 3-phosphate	-3.16	43.5	C03189	172.014	0.841	C3 H9 O6 P	172.013	171.006	[M-H]	2.34198e+07	1.9632e+07	2.40934e+07	2.25582e+07	3.10206e+07	2.11444e+07	2.10293e+07	2.08319e+07
3	Glycolic acid	-16.05	100	C00160	76.016	1.229	C2 H4 O3	76.0148	75.0075	[M-H]	6.02462e+06	1.00851e+07	3.35906e+06	3.09975e+06	8.30525e+06	7.12133e+06	6.56122e+06	8.65191e+06
2607	Guanosine	2.33	31.1	C00387	283.092	1.645	C10 H13 N5 O5	283.092	282.085	[M-H]	19598.7	24438.4	50747.3	1.96217e+06	20071.1	19567.5	18779.4	18408.9
973	Hydroxyphenyllactic acid	-2.43	75.8	C03672	182.058	5.801	C9 H10 O4	182.057	181.05	[M-H]	3.34704e+07	586020	7.87642e+06	733266	565757	3.10224e+07	4.29906e+07	6.05467e+06
86	HYDROXYPYRUVATE	-10.17	54.3		104.011	0.974	C3 H4 O4	104.01	103.003	[M-H]	1.07281e+06	1.2305e+06	716800	2.85167e+06	437767	487750	375963	685408
1617	Hydroxysebacic acid	-0.04	66		218.115	4.911	C10 H18 O5	218.115	217.108	[M-H]	322941	470813	186219	1.9771e+06	226155	105223	158575	178217
1118	Hydroxysuberic acid	-1.95	42.3		190.084	3.566	C8 H14 O5	190.084	189.076	[M-H]	427520	313321	94009.8	6.06926e+06	143888	90670.4	79698.8	148056
324	Hypoxanthine	-6.46	98.2	C00262	136.039	1.297	C5 H4 N4 O	136.038	135.03	[M-H]	1.19895e+06	223522	1.89201e+06	1.43339e+06	8.22214e+06	154066	67794.3	270149
325	Hypoxanthine	-6.45	91.5	C00262	136.039	0.864	C5 H4 N4 O	136.038	135.03	[M-H]	1.31229e+06	199667	2.45898e+06	924165	9.68867e+06	102240	24685.8	220188
218	Imidazoleacetic acid	-7.44	74.7	C02835	126.043	1.735	C5 H6 N2 O2	126.042	125.035	[M-H]	3.46689e+07	1.63525e+07	3.24984e+07	7.04389e+06	3.88963e+07	4.04124e+07	4.72471e+07	2.20402e+07
143	Indole	-8.36	43.8		117.058	5.374	C8 H7 N	117.057	116.05	[M-H]	2.1012e+06	1.60152e+06	3.72124e+06	214485	365637	730147	1.47747e+06	2.19476e+06
618	Indole-2-carboxylic acid	-3.89	95.3		161.048	5.373	C9 H7 N O2	161.047	160.04	[M-H]	1.11775e+07	9.07443e+06	1.78139e+07	1.05368e+06	2.03238e+06	4.32306e+06	8.27947e+06	1.14309e+07
857	Indole-3-acetic acid	-3.32	47.1	C00954	175.063	5.767	C10 H9 N O2	175.063	174.055	[M-H]	9.35705e+07	2.38274e+06	8.15699e+07	1.10044e+07	1.23879e+07	1.6497e+07	4.72098e+07	3.05973e+08
2992	Indole-3-acetyl-L-glutamic acid	-5.8	14.8		304.106	7.156	C15 H16 N2 O5	304.104	303.097	[M-H]	1.17439e+07	34204.2	4.28765e+06	48011.9	5.41788e+06	53118.3	46797	4.10902e+06
2481	Indole-3-acetyl-L-valine	2.84	12.2		274.132	6.112	C15 H18 N2 O3	274.133	273.125	[M-H]	634197	817844	581072	2.49723e+06	177436	67605.4	232462	168275
1387	Indolelactic acid	-0.91	93.2	C02043	205.074	4.501	C11 H11 N O3	205.074	204.066	[M-H]	1.95269e+06	1.85291e+06	1.20003e+06	235131	803328	1.31561e+06	1.56559e+06	245111
1290	IS_2-CHLORO-PHENYLALANINE	-1.59	90.4		199.04	3.312	C9 H10 Cl N O2	199.04	198.032	[M-H]	6.23687e+08	6.167e+08	6.0463e+08	6.05463e+08	6.34071e+08	6.66309e+08	6.5484e+08	6.42547e+08
268	Isoleucine	-6.95	28.3		131.095	3.726	C6 H13 N O2	131.094	130.086	[M-H]	395086	420582	419563	1.07487e+06	483007	434032	440603	453185
247	Itaconic acid	-6.92	39.9	C00490	130.027	2.739	C5 H6 O4	130.026	129.018	[M-H]	4.50749e+06	1.72284e+06	1.24535e+06	4.25686e+06	1.41908e+06	1.33599e+06	1.38312e+06	1.38335e+06
285	L-Aspartic acid	-6.6	46.3	C00049	133.038	0.787	C4 H7 N O4	133.037	132.029	[M-H]	1.42723e+06	2.42878e+06	1.284e+06	5.71638e+06	4.20684e+06	1.23944e+06	2.2115e+06	1.65223e+06
1321	Lauric acid	-5.4	59	C02679	200.178	7.933	C12 H24 O2	200.177	199.169	[M-H]	1.20146e+07	1.19433e+07	1.1697e+07	1.11033e+07	3.83713e+06	7.58717e+06	8.20521e+06	6.81301e+06
1322	Lauric acid	-3.69	49.9	C02679	200.178	8.051	C12 H24 O2	200.177	199.17	[M-H]	1.9095e+06	6.66022e+06	1.63251e+06	8.27049e+06	973040	6.90147e+06	1.85756e+06	1.18367e+06
267	Leucine	-6.95	75.8		131.095	4.564	C6 H13 N O2	131.094	130.086	[M-H]	536744	198878	167638	1.02287e+06	179330	162161	169714	132633
443	L-Glutamic acid	-5.08	32.6	C00025	147.053	0.793	C5 H9 N O4	147.052	146.045	[M-H]	2.79109e+06	3.43488e+06	3.14451e+06	4.73195e+06	1.62478e+07	1.24568e+06	1.05337e+06	1.40672e+06
2566	Linoleic acid	1.25	97.2	C01595	280.24	13.097	C18 H32 O2	280.241	279.233	[M-H]	2.74043e+07	1.54511e+07	2.51844e+07	9.55105e+06	3.14706e+07	2.98212e+07	2.69581e+07	3.41444e+07
2567	Linoleic acid	1.65	70.6		280.24	13.336	C18 H32 O2	280.241	279.233	[M-H]	950869	1.02201e+06	1.02745e+06	687696	1.00938e+06	865066	919717	1.0091e+06
22	L-Lactic acid	-13.03	98	C00186	90.0317	0.889	C3 H6 O3	90.0305	89.0232	[M-H]	1.17472e+08	6.27789e+07	3.56178e+07	1.03916e+08	6.48491e+07	5.51942e+07	1.22315e+08	4.10461e+07
23	L-Lactic acid	-12.83	99.1	C00186	90.0317	1.296	C3 H6 O3	90.0305	89.0233	[M-H]	5.40689e+07	5.19433e+07	5.44437e+07	5.56963e+07	4.72275e+07	4.26599e+07	5.45484e+07	4.29367e+07
2279	Lotaustralin	1.61	29.1		261.121	3.948	C11 H19 N O6	261.122	260.114	[M-H]	16762.3	11041.5	13199.4	13901.6	105105	1.21804e+06	670891	29040.7
687	L-Phenylalanine	-3.8	37.1	C00079	165.079	4.5	C9 H11 N O2	165.078	164.071	[M-H]	875164	603837	188401	5.74566e+06	265908	92519.6	144711	128220
1370	L-Tryptophan	-1.22	95.2	C00806	204.09	3.274	C11 H12 N2 O2	204.09	203.082	[M-H]	662815	921536	853107	3.9507e+06	2.61991e+06	262078	152024	347229
1197	L-Tyrosine methyl ester	-1.78	34.7	C03404	195.09	3.483	C10 H13 N O3	195.089	194.082	[M-H]	6.17385e+07	853382	3.57811e+07	1.33758e+07	1.11408e+07	7.87456e+06	7.88097e+06	535700
3708	LysoPA(i-12:0/0:0)	2	92.8		354.181	9.557	C15 H31 O7 P	354.181	353.174	[M-H]	9.24e+07	8.69497e+07	9.04749e+07	8.1998e+07	7.69525e+07	8.5406e+07	9.33545e+07	9.18081e+07
4292	LysoPE(14:0/0:0)	2.53	21.8		425.254	8.018	C19 H40 N O7 P	425.255	424.248	[M-H]	8.17091e+07	7.57721e+07	7.5798e+07	7.25919e+07	7.20288e+07	7.78796e+07	8.29373e+07	7.62146e+07
978	Mannitol	-2.43	39.5		182.079	8.252	C6 H14 O6	182.079	181.071	[M-H]	332726	304068	812708	350044	438293	359246	327900	5.18497e+06
1103	Methyl indole-3-acetate	-1.91	31.9	C20635	189.079	5.408	C11 H11 N O2	189.079	188.071	[M-H]	2.06326e+06	185459	333250	69208.6	894140	1.41198e+06	4.41387e+06	1.15358e+06
1104	Methyl indole-3-acetate	-1.86	26.7		189.079	5.076	C11 H11 N O2	189.079	188.071	[M-H]	842731	1.16872e+06	1.24993e+06	1.03122e+06	1.20784e+06	1.00819e+06	1.14045e+06	1.26456e+06
2	Methylacetate	-16.38	79.9		74.0368	1.547	C3 H6 O2	74.0356	73.0283	[M-H]	674898	565753	167109	8.10854e+06	559623	73266.4	289098	153509
154	Methylmalonic acid	-8.37	93.4	C02170	118.027	1.001	C4 H6 O4	118.026	117.018	[M-H]	2.84856e+06	4.1382e+06	3.06752e+06	4.05701e+07	3.04206e+06	2.34524e+06	2.37875e+06	3.01531e+06
155	Methylmalonic acid	-8.27	90.7	C02170	118.027	1.335	C4 H6 O4	118.026	117.018	[M-H]	1.19717e+06	1.04124e+06	566570	1.27845e+07	870662	369326	437595	479225
275	Methylsuccinic acid	-6.7	98.1		132.042	2.89	C5 H8 O4	132.041	131.034	[M-H]	2.51009e+06	1.71866e+06	2.21799e+06	1.07223e+07	1.06226e+06	1.1723e+06	980872	1.18254e+06
470	Mevalonic acid	-5.35	32.3		148.074	2.451	C6 H12 O4	148.073	147.065	[M-H]	1.9942e+06	839999	495631	1.95482e+07	998158	477322	396141	1.4212e+06
1657	Monobutyl phthalate	0.03	38.2		222.089	7.699	C12 H14 O4	222.089	221.082	[M-H]	5.42513e+06	5.49325e+06	3.1729e+06	7.75685e+06	6.17326e+06	2.75282e+06	4.1278e+06	2.58494e+06
3854	Murolic acid	1.41	47.7		368.256	9.609	C21 H36 O5	368.257	367.25	[M-H]	2.3863e+06	471693	2.24832e+06	271402	530300	301783	95330.8	1.52141e+07
1759	Myristic acid	-0.27	89.9	C06424	228.209	12.605	C14 H28 O2	228.209	227.202	[M-H]	1.72585e+06	2.00785e+06	2.13465e+06	1.45229e+06	1.4078e+06	1.0677e+06	1.45999e+06	1.64291e+06
262	N-Acetylalanine	-7.23	38.9		131.058	1.517	C5 H9 N O3	131.057	130.05	[M-H]	528969	571535	551575	2.23283e+06	381485	334535	294259	423779
263	N-Acetylalanine	-7.12	31.2		131.058	1.33	C5 H9 N O3	131.057	130.05	[M-H]	528969	571535	551575	785647	381485	113084	143309	423779
913	N-Acetylanthranilic acid	-2.68	95.8	C06332	179.058	5.28	C9 H9 N O3	179.058	178.05	[M-H]	4.02648e+07	1.19728e+06	2.42911e+07	2.78947e+07	781735	453145	1.09773e+06	1.25985e+06
839	N-Acetyl-D-alloisoleucine	-3	56		173.105	4.566	C8 H15 N O3	173.105	172.097	[M-H]	2.50923e+06	331735	281081	1.07097e+07	661863	170684	317770	207245
840	N-Acetyl-D-alloisoleucine	-2.83	48.9		173.105	4.231	C8 H15 N O3	173.105	172.097	[M-H]	77801.1	44494.7	23972.4	2.1377e+06	46686.2	37597.3	44576.6	73295.8
841	N-Acetyl-D-alloisoleucine	-2.74	56.7		173.105	4.409	C8 H15 N O3	173.105	172.097	[M-H]	1.26302e+06	492594	243460	7.56308e+06	287681	102126	174016	169581
603	N-Acetyl-DL-norvaline	-4.15	60.8		159.09	2.807	C7 H13 N O3	159.089	158.082	[M-H]	6.09261e+06	1.0659e+06	1.16601e+06	3.52123e+07	566613	502213	560311	574259
142	N-ACETYLGLYCINE	-9.39	77		117.043	8.691	C4 H7 N O3	117.041	116.034	[M-H]	2.59015e+06	738478	789974	731555	818706	734556	666242	3.13491e+06
1670	N-Acetyl-L-tyrosine	0.01	82.6		223.084	3.538	C11 H13 N O4	223.084	222.077	[M-H]	548652	546886	525314	4.64707e+06	265443	132688	214127	190861
3073	N-ACETYLNEURAMINATE	1.94	12.2		309.106	0.874	C11 H19 N O9	309.107	308.099	[M-H]	367680	608456	53357.6	5.082e+06	74879.4	169503	58084.8	37733.1
1421	N-Acetylphenylalanine	-0.77	28		207.09	4.744	C11 H13 N O3	207.089	206.082	[M-H]	269110	373709	121209	3.70238e+06	818186	47327	147168	135523
1424	N-Acetylphenylalanine	-0.61	26.3		207.09	4.99	C11 H13 N O3	207.089	206.082	[M-H]	1.66818e+06	213627	304291	1.22355e+06	2.96373e+06	157418	180964	155457
2036	N-Acetyltryptophan	1.24	59		246.1	5.103	C13 H14 N2 O3	246.101	245.093	[M-H]	9.39992e+06	2.50272e+06	2.00357e+06	2.68508e+07	2.12516e+06	744228	1.9057e+06	655167
915	N-acetyltyramine	-2.84	82		179.095	4.712	C10 H13 N O2	179.094	178.087	[M-H]	1.34292e+07	7.56235e+06	3.63697e+07	1.51767e+07	1.17736e+07	7.98213e+06	1.48396e+07	1.70062e+07
602	N-Acetylvaline	-4.17	42.5		159.09	3.54	C7 H13 N O3	159.089	158.082	[M-H]	893906	712515	638436	2.69294e+06	568879	375559	378285	701379
188	Nicotinic acid	-7.46	40.6		123.032	0.943	C6 H5 N O2	123.031	122.024	[M-H]	1.9331e+06	1.32993e+06	1.92166e+06	3.23143e+06	2.77954e+06	2.74564e+06	1.61037e+06	2.57653e+06
269	Norleucine	-6.85	79.7		131.095	1.36	C6 H13 N O2	131.094	130.086	[M-H]	606364	516066	644370	1.22062e+06	671204	902239	762446	463347
145	NORVALINE	-8.09	87.8		117.079	3.112	C5 H11 N O2	117.078	116.071	[M-H]	328832	1.32673e+06	267164	1.41117e+06	330739	260481	288051	272408
2598	Oleic acid	1.15	96.9		282.256	13.93	C18 H34 O2	282.256	281.249	[M-H]	1.8411e+07	2.19462e+07	3.05461e+07	1.35478e+07	3.01324e+07	1.69551e+07	1.60626e+07	2.40244e+07
2599	Oleic acid	1.42	97		282.256	14.071	C18 H34 O2	282.256	281.249	[M-H]	3.55984e+06	3.68543e+06	3.58915e+06	3.05004e+06	8.80075e+06	3.57318e+06	3.4258e+06	4.09244e+06
2695	Orotidine	16.18	31.5		288.059	5.665	C10 H12 N2 O8	288.064	287.057	[M-H]	992761	49393.1	565083	1.10789e+06	511820	855632	1.89298e+06	1.14828e+06
2183	Palmitic acid	0.99	97.4	C00249	256.24	13.733	C16 H32 O2	256.24	255.233	[M-H]	2.7816e+07	2.41708e+07	2.92683e+07	2.67124e+07	2.14315e+07	2.14962e+07	2.22815e+07	2.49039e+07
2154	Palmitoleic acid	1.22	94.4	C08362	254.225	12.939	C16 H30 O2	254.225	253.218	[M-H]	1.89213e+06	3.71085e+06	2.17153e+06	1.20053e+06	1.30084e+06	866985	2.81831e+06	1.79418e+06
2155	Palmitoleic acid	1.36	97	C08362	254.225	12.835	C16 H30 O2	254.225	253.218	[M-H]	2.40502e+06	2.10126e+06	3.05585e+06	1.37052e+06	4.33145e+06	3.85679e+06	3.17183e+06	3.13842e+06
1620	Pantothenic acid	-0.18	49.6	C00864	219.111	2.888	C9 H17 N O5	219.111	218.103	[M-H]	4.46056e+06	955766	590221	1.8407e+07	1.32438e+06	367876	191175	642984
1984	Pentadecanoic acid	0.71	92.9	C16537	242.225	13.168	C15 H30 O2	242.225	241.217	[M-H]	644837	685958	563009	435459	564604	298294	468120	571818
40	Phenol	-12.73	98	C00146	94.0419	4.079	C6 H6 O	94.0407	93.0334	[M-H]	3.34451e+06	102477	864769	337101	832870	462594	689983	394098
42	Phenol	-12.17	98.9	C00146	94.0419	3.943	C6 H6 O	94.0407	93.0334	[M-H]	2.63629e+06	317851	1.04737e+06	745028	2.52327e+06	667982	840952	684000
330	Phenylacetic acid	-6.41	62.3		136.052	5.764	C8 H8 O2	136.052	135.044	[M-H]	6.42666e+07	6.69601e+06	5.14658e+07	6.15709e+06	1.16723e+07	1.21244e+07	3.82299e+07	5.56866e+06
333	Phenylacetic acid	-5.4	69.6		136.052	6.122	C8 H8 O2	136.052	135.044	[M-H]	3.05716e+07	2.70829e+07	3.00017e+07	2.62571e+07	2.8649e+07	2.92388e+07	3.03716e+07	2.98484e+07
2111	Phenylacetylaspartic acid	1.39	24.7		251.079	3.887	C12 H13 N O5	251.08	250.072	[M-H]	259050	911305	1.09255e+06	577486	601527	455179	705696	397353
1172	Phenylacetylglycine	-1.34	63.4	C05598	193.074	4.467	C10 H11 N O3	193.074	192.066	[M-H]	838878	88265.3	241416	190516	5.37786e+06	78161.1	748731	212506
57	Phosphoric acid	0.72	93.4		97.9769	0.766	H3 O4 P	97.977	96.9697	[M-H]	358950	458407	637200	238572	46835	96119.1	309400	393047
719	Phthalic acid	-3.74	81.6		166.027	4.127	C8 H6 O4	166.026	165.019	[M-H]	5.61914e+07	5.52989e+07	5.49224e+07	3.67409e+07	5.33928e+07	5.55738e+07	5.95816e+07	4.27525e+07
2872	picein	2	12.4		298.105	5.044	C14 H18 O7	298.106	297.099	[M-H]	15499.5	26343.4	16742.2	1.4664e+06	16201	15717.8	15979.2	14647
187	Picolinic acid	-7.85	88.1	C10164	123.032	1.296	C6 H5 N O2	123.031	122.024	[M-H]	2.44455e+06	2.74938e+06	1.50509e+06	6.56021e+06	1.46555e+06	980614	712444	2.30574e+06
608	Pimelic acid	-4.18	90.7	C02656	160.074	4.035	C7 H12 O4	160.073	159.066	[M-H]	7.03808e+06	5.28447e+06	1.52056e+06	4.24056e+07	1.82846e+06	905242	1.09959e+06	1.82552e+06
943	Propylparaben	-2.72	43.8	D01422	180.079	5.659	C10 H12 O3	180.078	179.071	[M-H]	380812	461277	399698	292082	424474	294539	314162	3.23463e+07
2126	Punctaporonin B	1.37	27.4		252.173	8.74	C15 H24 O3	252.173	251.166	[M-H]	1.12926e+06	825741	870770	750317	1.29789e+06	6.91408e+07	1.53966e+08	4.05016e+06
18	Pyruvic acid	-13.48	93.9	C00022	88.016	0.801	C3 H4 O3	88.0149	87.0076	[M-H]	5.04213e+06	3.45224e+06	1.63883e+06	6.80328e+06	1.68215e+06	1.64483e+06	1.7728e+06	1.00956e+07
19	Pyruvic acid	-12.97	96.4	C00022	88.016	0.97	C3 H4 O3	88.0149	87.0076	[M-H]	5.98667e+06	6.34464e+06	1.14329e+07	6.16532e+06	5.64273e+06	4.28131e+06	5.70157e+06	1.00956e+07
20	Pyruvic acid	-12.8	40.1	C00022	88.016	1.287	C3 H4 O3	88.0149	87.0076	[M-H]	4.88386e+07	7.90419e+07	4.84139e+07	4.25077e+06	5.4068e+06	2.55699e+06	4.94366e+07	8.04625e+07
3519	rabelomycin	1.76	75.7		338.079	11.187	C19 H14 O6	338.08	337.072	[M-H]	1.26957e+07	4.96356e+06	1.44626e+06	810525	572233	814603	328784	374804
3943	Riboflavin	1.79	13.8		376.138	5.034	C17 H20 N4 O6	376.139	375.132	[M-H]	207046	89936.4	147390	98399.4	307641	374200	431831	126451
364	Salicylic acid	-6.52	90.9	C00805	138.032	4.349	C7 H6 O3	138.031	137.024	[M-H]	2.91839e+06	1.70109e+06	914192	2.33459e+07	2.87165e+06	3.80265e+06	2.11592e+06	1.28024e+06
366	Salicylic acid	-6.3	98	C00805	138.032	3.943	C7 H6 O3	138.031	137.024	[M-H]	7.67373e+07	1.03794e+07	3.56573e+07	2.34866e+07	7.34133e+07	2.09651e+07	2.78888e+07	2.23793e+07
264	Skatole	-7.36	22.8		131.073	5.767	C9 H9 N	131.073	130.065	[M-H]	5.69625e+07	1.50558e+06	5.35508e+07	7.32895e+06	7.7355e+06	1.02036e+07	2.94169e+07	1.95416e+08
2637	Stearic acid	1.46	97.8		284.272	12.487	C18 H36 O2	284.272	283.265	[M-H]	5.866e+07	6.38959e+07	5.35447e+07	6.41916e+07	1.6464e+07	5.19283e+07	5.13433e+07	4.59372e+07
847	Suberic acid	-2.78	97	C08278	174.089	4.757	C8 H14 O4	174.089	173.081	[M-H]	1.32949e+07	1.17678e+07	3.77713e+06	2.48133e+07	4.93789e+06	3.26635e+06	4.04433e+06	4.33428e+06
207	Taurine	-7.58	86	C00245	125.015	0.791	C2 H7 N O3 S	125.014	124.006	[M-H]	9.14715e+06	3.8963e+06	1.25678e+07	2.41898e+07	6.07881e+07	2.05611e+06	1.83022e+06	3.55879e+06
1242	Tenuazonic Acid	-1.48	84		197.105	3.949	C10 H15 N O3	197.105	196.098	[M-H]	200187	178925	182526	245976	425840	622464	583050	226169
4074	Thaxtomin C	-0.89	34.2		392.148	4.506	C21 H20 N4 O4	392.148	391.141	[M-H]	467979	136320	1.79923e+06	12116.3	345485	1.14025e+06	2.44663e+06	17024.1
165	Threonine	-8.33	39.4	C12317	119.058	0.789	C4 H9 N O3	119.057	118.05	[M-H]	1.19023e+06	614875	1.34711e+06	4.99839e+06	4.5842e+06	424594	331254	705408
371	Tyrosol	-6.48	96.6	C06044	138.068	6.123	C8 H10 O2	138.067	137.06	[M-H]	713193	258142	788108	165382	2.4274e+07	2.52893e+08	4.10053e+08	1.05182e+06
1573	Undecanedioic acid	-0.1	26.4		216.136	5.013	C11 H20 O4	216.136	215.129	[M-H]	4.9521e+06	990278	592949	4.51655e+06	586201	544727	652599	1.44976e+06
115	Uracil	-9.52	99.6	C00106	112.027	0.868	C4 H4 N2 O2	112.026	111.019	[M-H]	2.25636e+08	2.77818e+07	1.72628e+08	6.06644e+06	4.69256e+07	9.14602e+07	1.07329e+08	2.16612e+07
116	Uracil	-9.43	97.5	C00106	112.027	1.295	C4 H4 N2 O2	112.026	111.019	[M-H]	1.07155e+08	1.44138e+07	8.59506e+07	3.92992e+06	2.62026e+07	4.81695e+07	5.07357e+07	1.14126e+07
2003	Uridine	0.9	49	C00299	244.07	0.871	C9 H12 N2 O6	244.07	243.062	[M-H]	587936	463075	1.01597e+06	2.32192e+07	1.8632e+06	208683	209015	199204
2004	Uridine	1.11	52.9	C00299	244.07	1.317	C9 H12 N2 O6	244.07	243.063	[M-H]	174524	283950	479260	1.56335e+07	655693	125665	128274	74456.7
368	Urocanic acid	-6.13	51.4	C00785	138.043	0.866	C6 H6 N2 O2	138.042	137.035	[M-H]	1.99845e+06	2.54358e+06	2.20048e+06	3.00655e+06	2.67448e+06	1.92222e+06	1.84295e+06	2.10802e+06
1540	Valylproline	-0.47	90.8		214.132	4.562	C10 H18 N2 O3	214.132	213.124	[M-H]	7.23334e+06	56638.6	359348	3.57052e+06	3.4354e+06	303748	280237	1.11513e+06
1513	Volemitol	-0.67	91.8		212.09	0.796	C7 H16 O7	212.089	211.082	[M-H]	97618.7	135929	64723.3	6.09907e+07	27220.5	132716	91080	99078.2
499	Xanthine	-5.35	90	C00385	152.033	0.866	C5 H4 N4 O2	152.033	151.025	[M-H]	8.16018e+07	1.75196e+06	3.98235e+07	3.31568e+06	1.02268e+07	2.84814e+06	4.11543e+06	829871
500	Xanthine	-5.2	90.1	C00385	152.033	1.297	C5 H4 N4 O2	152.033	151.025	[M-H]	7.90168e+07	1.84621e+06	4.10805e+07	3.39383e+06	2.27069e+07	3.17108e+06	4.20905e+06	920278
3272	zearalenol	-5.84	40.6		320.162	8.695	C18 H24 O5	320.161	319.153	[M-H]	36381.2	34420.8	36256.7	42693.6	41468.1	1.15407e+06	5.6143e+06	51247.7

## Sheet: Negative mode internal standard
id	MS2.name	MS2.ppm	MS2.score	KEGG.ID	Monoisotopic.Molecular.Weight	RT.[min]	Formula	m/z	Molecular.Weight	Reference Ion	J61Colletotrichum gloeosporioides	J15 Colletotrichum sojae	J74 Fusarium commune	J2-Alternaria sp	C5_N	C9_N	C10_N	C18_N
200	4-Methylcatechol	-8.01	85.2		124.052	2.868	C7 H8 O2	123.044	124.051	[M-H]	6.0416	1.47655	1.31582	0.552623	0.679241	0.705747	0.950145	0.373174
895	Aesculetin	-2.79	88.4		178.027	4.377	C9 H6 O4	177.019	178.026	[M-H]	2.7637	2.77243	12.439	1.51512	0.20154	0.219029	0.350224	0.200736
896	Aesculetin	-2.36	78.7		178.027	4.151	C9 H6 O4	177.019	178.026	[M-H]	12.0045	1.7698	6.0863	1.20384	5.29457	5.63774	10.6741	2.21259
930	Caffeic acid	-2.77	97.8	C01197	180.042	4.361	C9 H8 O4	179.034	180.042	[M-H]	19.86	0.447785	0.686015	9.61279	1.23358	0.364798	0.359822	0.308484
931	Caffeic acid	-2.74	98.2	C01197	180.042	4.159	C9 H8 O4	179.034	180.042	[M-H]	36.7526	11.9294	9.33748	884.747	33.707	2.73309	0.970014	0.813387
937	Caffeic acid	-2.51	90.1	C01197	180.042	3.966	C9 H8 O4	179.035	180.042	[M-H]	0.528991	0.593529	0.561322	7.26487	0.703921	0.623385	0.925428	0.813387
106	Catechol	-9.38	99.1	C01785	110.037	4.025	C6 H6 O2	109.028	110.036	[M-H]	5.68558	1.00885	9.62421	2.61522	1.65535	1.60204	10.7949	1.31189
1479	Divaricatinic acid	-0.72	12.2		210.089	5.766	C11 H14 O4	209.082	210.089	[M-H]	7.90082	1.03257	4.31933	0.100476	0.51857	0.041628	0.0618402	0.861154
1007	Epinephrine	-2.95	90.4	C00788	183.09	5.604	C9 H13 N O3	182.082	183.089	[M-H]	0.503262	0.382905	0.3679	2066.81	2.6553	1.56978	1.0909	0.759428
1182	Ferulic acid	-1.52	95.2	C01494	194.058	5.033	C10 H10 O4	193.05	194.058	[M-H]	37.9773	24.005	44.836	0.716272	3.23444	1.95659	1.5436	1.78995
1186	Ferulic acid	-1.32	93.2	C01494	194.058	5.197	C10 H10 O4	193.05	194.058	[M-H]	6.2024	2.72308	2.62916	0.326939	1.06473	0.665814	1.08796	0.209996
783	Gallic acid	-3.29	80.8	C01424	170.022	4.178	C7 H6 O5	169.014	170.021	[M-H]	0.622826	0.0936486	1.18556	2.64579	0.0652291	0.0368284	1.57236	0.0276641
517	Gentisic acid	-4.74	96.4	C00628	154.027	4.18	C7 H6 O4	153.019	154.026	[M-H]	3.36076	0.666307	3.90026	11.9768	0.825475	0.430206	8.02223	0.380521
518	Gentisic acid	-4.74	74.3	C00628	154.027	3.811	C7 H6 O4	153.019	154.026	[M-H]	46.9826	5.09547	8.11211	8.76802	22.9	6.30061	12.6484	6.24214
1211	Haematommic acid	-1.58	72.1		196.037	3.346	C9 H8 O5	195.03	196.037	[M-H]	32.7941	1.19763	1.68866	0.730243	3.35264	1.95969	6.84405	0.612177
3168	Haematommone	2.35	71.9		314.043	7.084	C16 H10 O7	313.036	314.043	[M-H]	8.31413	0.88253	0.454472	0.0829086	8.0757	10.9948	1.24552	1.57198
3169	Haematommone	2.45	72.8		314.043	7.222	C16 H10 O7	313.036	314.043	[M-H]	7.10012	0.633856	0.265656	0.0717437	7.368	8.94028	1.12141	1.29341
747	Homogentisic acid	-3.56	66.4	C00544	168.042	5.003	C8 H8 O4	167.034	168.042	[M-H]	2.43767	14.8285	11.8857	3.56992	1.73963	1.24695	1.352	0.949374
750	Homogentisic acid	-3.32	53.2	C00544	168.042	5.369	C8 H8 O4	167.034	168.042	[M-H]	2.87323	1.23162	0.863537	0.912608	4.29381	0.611866	3.95031	0.555653
971	Homovanillic acid	-2.57	92.3	C05582	182.058	6.998	C9 H10 O4	181.05	182.057	[M-H]	2.79701	1.71343	0.884475	0.814628	218.527	8.35361	3.57241	6.11029
749	Isovanillic acid	-3.5	64.4		168.042	4.539	C8 H8 O4	167.034	168.042	[M-H]	2.47998	1.28732	3.35508	1.31169	1.40155	0.779699	1.05502	0.697788
775	Norepinephrine	-3.23	92.8	C00547	169.074	4.715	C8 H11 N O3	168.066	169.073	[M-H]	0.0867303	0.0208381	0.0392286	16.6749	0.0939866	0.0298757	0.0307554	0.0347141
2222	norlichexanthone	1.78	90.3		258.053	7.101	C14 H10 O5	257.046	258.053	[M-H]	0.0864991	0.0533963	0.0586753	74.363	0.27528	0.114037	0.551796	0.0641445
2953	Quercetin	1.86	95.2	C00389	302.043	6.193	C15 H10 O7	301.036	302.043	[M-H]	11.0282	1.28716	3.38953	0.828217	1.42144	1.1028	3.27294	6.07409
2954	Quercetin	1.91	92.4	C00389	302.043	6.284	C15 H10 O7	301.036	302.043	[M-H]	6.73537	0.612682	2.1274	0.828217	1.27174	0.857442	2.21467	2.1735
1252	Syringic acid	-1.48	61.9	C10833	198.053	4.808	C9 H10 O5	197.045	198.053	[M-H]	2.21095	0.0299874	1.1448	0.0647971	0.227442	2.1916	4.32299	0.085195
1253	Syringic acid	-1.46	44.3	C10833	198.053	4.276	C9 H10 O5	197.045	198.053	[M-H]	2.63473	0.509456	1.1588	0.369624	0.555814	0.543717	0.547518	0.49644
2983	Taxifolin	2.82	69.3		304.058	5.096	C15 H12 O7	303.052	304.059	[M-H]	2.21073	0.61385	0.82981	1.15837	0.595563	0.750944	1.359	0.51437
504	Vanillin	-4.96	52.9	D00091	152.047	4.366	C8 H8 O3	151.039	152.047	[M-H]	6.08756	1.93494	3.52465	4.14958	5.43701	3.11325	2.90375	2.77747
2323	(±)-Abscisic acid	2.04	88.5		264.136	6.111	C15 H20 O4	263.129	264.137	[M-H]	30.7923	24.2067	24.7309	34.279	25.7886	13.7504	25.9758	18.2458
2324	(±)-Abscisic acid	2.1	78.1		264.136	5.849	C15 H20 O4	263.129	264.137	[M-H]	4.93138	3.7546	5.26271	6.31264	3.97218	2.26037	4.13661	3.94787
1979	(Z)-2-octylpent-2-enedioic acid		22.2		242.152	5.266	C13 H22 O4	241.145	242.152	[M-H]	1.04685	1.4804	0.246425	2.36577	0.326154	0.154212	0.173976	0.182815
1981	(Z)-2-octylpent-2-enedioic acid		25.9		242.152	5.039	C13 H22 O4	241.145	242.152	[M-H]	0.618975	1.08247	0.344043	3.09965	1.28177	1.29441	0.929926	0.185487
3442	(Z)-9,12,13-trihydroxyoctadec-15-enoic acid		85.7		330.241	7.645	C18 H34 O5	329.234	330.241	[M-H]	49.7934	12.1169	31.771	33.7025	21.0638	21.1648	47.0034	25.5854
1214	1,2-Propanediol, 3-(1,3-benzodioxol-5-yl)-		76.9		196.074	4.121	C10 H12 O4	195.066	196.073	[M-H]	0.799843	0.904248	1.67357	1.36942	0.309047	1.06709	2.12643	1.23901
1215	1,2-Propanediol, 3-(1,3-benzodioxol-5-yl)-		76.8		196.074	4.477	C10 H12 O4	195.066	196.073	[M-H]	2.57089	0.689661	1.04109	0.892943	0.189663	1.08171	2.4855	0.142271
306	1,5,6,7-TETRAHYDRO-4H-INDOL-4-ONE		81.6		135.068	4.121	C8 H9 N O	134.06	135.068	[M-H]	4.76446	2.9551	0.876195	10.867	2.75409	0.226155	0.279118	1.43258
3096	11(Z)-Eicosenoic acid		82.5	C16526	310.287	12.821	C20 H38 O2	309.281	310.288	[M-H]	0.941108	0.895708	1.47401	1.57236	1.11894	2.07911	0.845541	0.802614
2924	12-Hydroxyoctadecanoic acid		88.8		300.266	11.665	C18 H36 O3	299.26	300.267	[M-H]	43.8945	17.7647	15.9322	10.1405	278.402	360.427	232.455	138.164
2799	13(S)-HOTrE		50	C16316	294.219	9.699	C18 H30 O3	293.213	294.22	[M-H]	3.88337	22.8954	25.4757	3.25637	2.33796	3.63804	3.29654	6.41946
2458	16-Hydroxyhexadecanoic acid		98.3	C18218	272.235	10.432	C16 H32 O3	271.228	272.236	[M-H]	21.6119	8.98706	9.59145	6.65095	42.4063	107.53	102.336	36.9012
2459	16-Hydroxyhexadecanoic acid		98.2	C18218	272.235	10.223	C16 H32 O3	271.228	272.236	[M-H]	5.62958	2.3182	3.5784	4.82897	10.7699	29.9799	16.9601	10.0985
725	1-Methylxanthine		30.4		166.049	2.55	C6 H6 N4 O2	165.041	166.048	[M-H]	1.75412	1.34236	1.5481	1.84406	3.58171	3.14411	4.52479	0.749427
519	2,3-Dihydroxybenzoic acid		92.4	C00196	154.027	2.968	C7 H6 O4	153.019	154.026	[M-H]	0.836989	0.314375	0.911415	2.52768	5.31561	1.55786	3.27117	0.434874
1512	2,4,5-trimethoxybenzoic acid		37.6		212.068	4.278	C10 H12 O5	211.061	212.068	[M-H]	1.33784	2.90181	0.796221	1.26186	0.806422	0.523124	1.01835	0.401105
525	2,6-Dihydroxy-4-Methoxytoluene		79.1		154.063	4.771	C8 H10 O3	153.055	154.062	[M-H]	39.338	2.89755	25.0139	1.88524	13.8884	26.8919	144.214	14.0434
2116	2,6-Di-tert-butyl-4-nitrophenol		91.3		251.152	11.593	C14 H21 N O3	250.145	251.152	[M-H]	11.8653	13.4958	16.3994	13.9285	12.9381	12.2678	15.2569	12.907
506	2-Anisic acid		73.3		152.047	3.572	C8 H8 O3	151.039	152.047	[M-H]	2.92196	3.44713	4.1533	3.13367	5.02222	2.31344	2.70218	4.75968
114	2-Furoic acid		18.4		112.016	0.876	C5 H4 O3	111.008	112.015	[M-H]	0.687006	1.37305	0.660773	5.2778	0.587154	1.07978	0.672745	1.22467
158	2-Hydroxy-3-methylbutyric acid		70.7		118.063	2.904	C5 H10 O3	117.055	118.062	[M-H]	3.36172	2.67959	3.64166	4.59291	3.08238	2.17098	2.36993	2.35942
159	2-Hydroxy-3-methylbutyric acid		64.1		118.063	2.552	C5 H10 O3	117.055	118.062	[M-H]	2.17476	1.55482	2.16129	4.01121	1.46317	1.45786	1.49808	1.74682
493	2-hydroxyacetanilide		76.9		151.063	4.278	C8 H9 N O2	150.055	151.063	[M-H]	0.544179	4.89684	3.96155	4.47896	2.29767	1.51933	2.5009	0.944059
490	2-Hydroxybenzothiazole		90.4		151.009	4.83	C7 H5 N O S	150.001	151.008	[M-H]	3.44277	3.7864	4.16222	5.84018	4.21372	3.91612	4.30757	5.05888
202	2-Hydroxybenzyl alcohol		95.7	C02323	124.052	3.458	C7 H8 O2	123.044	124.051	[M-H]	89.0258	0.829863	22.9973	15.9551	39.0682	6.71948	12.7714	3.60382
668	2-Hydroxycinnamic acid		81.1		164.047	5.477	C9 H8 O3	163.039	164.047	[M-H]	0.753803	0.472477	2.54229	0.727112	0.560711	0.606374	3.23896	0.620227
671	2-Hydroxycinnamic acid		82.2	C01772	164.047	5.081	C9 H8 O3	163.039	164.047	[M-H]	4.93181	1.48234	20.0087	18.3148	1.2069	0.547516	1.06301	1.39176
673	2-Hydroxycinnamic acid		80	C01772	164.047	5.175	C9 H8 O3	163.04	164.047	[M-H]	4.93181	3.64875	18.4597	12.3268	0.851213	0.547516	1.06301	0.891179
282	2-Hydroxyisocaproic acid		50.3		132.079	3.666	C6 H12 O3	131.07	132.078	[M-H]	2.77756	2.32074	2.70506	3.52492	6.00919	2.4643	2.30485	1.58971
611	2-HYDROXYOCTANOIC ACID		39.7		160.11	4.705	C8 H16 O3	159.102	160.109	[M-H]	0.740831	3.44746	0.862255	0.878481	1.91722	0.475994	0.629088	0.587748
612	2-HYDROXYOCTANOIC ACID		38.9		160.11	5.083	C8 H16 O3	159.102	160.109	[M-H]	1.22914	1.99788	1.14287	1.05732	2.13264	0.837402	1.3273	0.690301
157	2-Hydroxyvaleric acid		81.1		118.063	3.345	C5 H10 O3	117.055	118.062	[M-H]	20.5547	4.25999	6.26513	25.1611	10.4725	3.99895	5.91153	37.2618
876	2-Isopropylmalic acid		36.7	C02504	176.068	3.724	C7 H12 O5	175.061	176.068	[M-H]	18.6644	3.18744	0.913494	22.1054	0.872207	1.96302	2.04376	1.70254
898	2-Methoxycinnamic acid		66.4		178.063	4.941	C10 H10 O3	177.055	178.062	[M-H]	3.0951	1.8198	1.43803	0.622764	0.51098	0.419953	0.564772	0.559209
901	2-Methoxycinnamic acid		60.1		178.063	4.472	C10 H10 O3	177.055	178.063	[M-H]	0.722447	0.493438	1.61031	30.8912	0.349455	0.362979	0.421891	0.400307
160	2-Methyl-3-hydroxybutyric acid		30.2		118.063	2.298	C5 H10 O3	117.055	118.062	[M-H]	3.42844	2.3435	1.97148	8.16714	2.09382	1.73352	2.11123	2.08544
431	2-Methylglutaric acid		63.1	C05282	146.058	2.023	C6 H10 O4	145.05	146.057	[M-H]	46.3727	14.0771	19.0836	62.3106	46.8074	11.8086	12.0227	9.3075
1169	2-Methylhippuric acid		61.7		193.074	4.044	C10 H11 N O3	192.066	193.074	[M-H]	6.82608	3.90441	4.56047	0.362842	0.53656	2.74087	2.93106	0.358171
1170	2-Methylhippuric acid		28.2		193.074	3.486	C10 H11 N O3	192.066	193.074	[M-H]	1.22353	0.145033	1.05133	0.470742	0.325269	0.254466	0.241273	0.210254
1171	2-Methylhippuric acid		47		193.074	3.784	C10 H11 N O3	192.066	193.074	[M-H]	5.19246	5.46705	21.9661	17.2775	8.41295	12.0734	17.0339	10.59
69	2-Oxobutyric acid		42.1		102.032	0.816	C4 H6 O3	101.023	102.031	[M-H]	12.8887	18.7906	8.08392	42.6759	8.16962	11.1506	11.4312	8.97039
2247	2-Thiocytidine		74.1		259.063	3.803	C9 H13 N3 O4 S	258.054	259.062	[M-H]	0.202966	0.169501	0.511919	0.0171496	0.0320692	0.137391	0.11156	0.0126411
746	3,4-Dihydroxyphenylacetic acid	-3.61	77.5	C01161	168.042	3.459	C8 H8 O4	167.034	168.042	[M-H]	5.07546	0.945156	1.43589	1.49368	2.45807	3.04746	0.883817	0.503503
486	3,4-Dimethylbenzoic acid	-5.06	32.2		150.068	4.758	C9 H10 O2	149.06	150.067	[M-H]	1.26603	0.764932	1.98424	0.505238	0.466958	0.378699	0.428594	0.39434
1373	3,5-dihydroxydecanoic acid	-0.93	48.2		204.136	4.779	C10 H20 O4	203.129	204.136	[M-H]	0.523708	0.315925	0.228824	2.07204	0.197639	0.0519802	0.114551	0.141367
1374	3,5-dihydroxydecanoic acid	-0.85	62.6		204.136	4.659	C10 H20 O4	203.129	204.136	[M-H]	0.202512	0.323316	0.204091	2.06383	0.16822	0.0883579	0.0717483	0.0889995
972	3,5-Dimethoxybenzoic acid	-2.51	55.7		182.058	4.001	C9 H10 O4	181.05	182.057	[M-H]	14.541	10.0328	5.24428	1.79515	1.11869	1.28862	3.27956	0.792855
186	3-Ethylphenol	-8.01	24.9		122.073	5.512	C8 H10 O	121.065	122.072	[M-H]	0.0444154	0.0277169	0.0308877	0.0603187	0.0287402	0.0254477	0.0506507	4.95535
636	3-Hydroxy-3-methylglutaric acid	-4.23	43.9		162.053	1.3	C6 H10 O5	161.045	162.052	[M-H]	1.29558	1.40773	1.15439	2.75392	1.36012	1.1711	1.15256	1.16355
638	3-Hydroxy-3-methylglutaric acid	-4.01	34.7	C03761	162.053	1.683	C6 H10 O5	161.045	162.052	[M-H]	3.76029	4.13372	2.81049	16.0052	3.11148	3.03942	2.7479	2.99937
513	3-Hydroxyanthranilic acid	-4.74	85.2	C00632	153.043	2.781	C7 H7 N O3	152.035	153.042	[M-H]	5.97936	6.08634	5.86263	9.89189	6.4221	5.8023	6.10584	6.32384
88	3-HYDROXYBUTANOIC ACID	-10.4	69.2		104.047	1.698	C4 H8 O3	103.039	104.046	[M-H]	27.5847	4.33515	14.5535	192.731	11.4401	16.2041	5.26574	7.75757
503	3-Hydroxyphenylacetic acid	-5.37	81.5	C05593	152.047	4.687	C8 H8 O3	151.039	152.047	[M-H]	862.252	7.66401	140.816	9.7815	570.618	144.217	103.151	128.771
380	3-Hydroxypicolinic acid	-5.8	87.8	C18620	139.027	1.79	C6 H5 N O3	138.019	139.026	[M-H]	27.3618	27.1346	28.0618	32.0758	29.1058	26.0732	27.5642	28.3811
729	3-Methoxyphenylacetic acid	-3.81	86.5		166.063	5.513	C9 H10 O3	165.055	166.062	[M-H]	1.14672	1.72458	1.00156	1.65125	1.20727	0.78015	1.18757	38.8827
444	3-METHYL-2-OXINDOLE	-5.36	39.9		147.068	4.312	C9 H9 N O	146.06	147.068	[M-H]	0.383828	0.0206026	0.585988	0.504792	0.0625087	0.0677477	0.117989	2.6317
429	3-Methylglutaric acid	-5.81	83.5		146.058	3.299	C6 H10 O4	145.05	146.057	[M-H]	4.3055	11.8905	5.54787	15.7842	5.46417	4.85593	6.19431	8.28722
430	3-Methylglutaric acid	-5.46	97.6		146.058	3.436	C6 H10 O4	145.05	146.057	[M-H]	1.8638	1.59566	1.25817	10.2501	1.61228	1.24704	1.29106	1.47431
2224	3'-O-Methyluridine	1.78	38.8		258.085	2.367	C10 H14 N2 O6	257.078	258.086	[M-H]	0.687912	0.689107	0.967372	5.22064	0.238999	0.175119	0.294384	0.0359792
726	3-Phenyllactic acid	-4.01	97	C05607	166.063	4.935	C9 H10 O3	165.055	166.062	[M-H]	142.807	334.267	81.6089	240.724	74.9114	10.1379	18.5423	11.8489
1038	3-Phosphoglyceric acid	-10.09	42.6	C00597	185.993	14.136	C3 H7 O7 P	184.984	185.991	[M-H]	12.4634	10.5691	12.1758	12.083	10.0361	10.9364	10.6985	11.55
416	4-Acetamidobutanoic acid	-5.37	49.7	C02946	145.074	1.792	C6 H11 N O3	144.066	145.073	[M-H]	5.6702	1.85109	1.89713	79.8261	2.37102	2.45976	0.681135	2.36227
351	4-Aminobenzoic acid	-6.17	88.5	C00568	137.048	4.014	C7 H7 N O2	136.04	137.047	[M-H]	2.20944	2.62074	3.70621	1.03619	1.68531	3.04889	4.98032	3.62258
104	4-Aminophenol	-9.48	64.5		109.053	4.277	C6 H7 N O	108.044	109.052	[M-H]	0.866216	1.64182	1.49183	1.67149	0.0901893	0.308277	0.770509	0.264721
507	4-Anisic acid	-4.77	74.9	C02519	152.047	3.703	C8 H8 O3	151.039	152.047	[M-H]	2.92196	1.73527	12.7228	1.84373	1.94511	1.79375	2.70218	1.85124
666	4-Coumaric acid	-3.73	38.6	C00811	164.047	3.47	C9 H8 O3	163.039	164.047	[M-H]	1.92594	0.894888	1.20903	4.42993	0.917489	0.481855	0.527035	0.548922
3366	4-Dodecylbenzenesulfonic acid	1.35	91.4		326.192	14.278	C18 H30 O3 S	325.185	326.192	[M-H]	110.558	138.273	107.132	72.2759	77.0661	93.2751	93.3062	129.259
1395	4-hydroxy-3-(3-methylbut-2-enyl)benzoic acid	-0.69	37		206.094	6.989	C12 H14 O3	205.087	206.094	[M-H]	7.16629	0.117887	3.62668	0.116927	0.182328	4.66935	9.42141	3.20874
1396	4-hydroxy-3-(3-methylbut-2-enyl)benzoic acid	-0.65	32.3		206.094	7.385	C12 H14 O3	205.087	206.094	[M-H]	4.02433	0.355419	2.5975	0.0930287	0.164867	3.99627	6.04047	2.63736
215	4-Hydroxy-6-methyl-2-pyrone	-7.41	99.4	C02752	126.032	3.582	C6 H6 O3	125.023	126.031	[M-H]	1.01241	0.80626	0.869883	4.16083	0.769884	0.690065	0.791387	0.81637
201	4-Hydroxybenzyl alcohol	-7.99	93.7	C17467	124.052	3.214	C7 H8 O2	123.044	124.051	[M-H]	2.09057	0.392979	1.45434	4.07695	1.8997	3.68654	16.7581	0.9754
89	4-Hydroxybutyric acid	-10.19	48.3	C00989	104.047	1.372	C4 H8 O3	103.039	104.046	[M-H]	16.1787	1.99372	5.16234	15.0055	3.4849	1.14023	1.32297	1.60575
739	4-Hydroxyphenylglycine	-3.32	40.8		167.058	4.146	C8 H9 N O3	166.05	167.058	[M-H]	2.11299	4.98486	5.06399	8.56942	4.96511	4.60511	4.84282	2.28917
936	4-Hydroxyphenylpyruvic acid	-2.51	24		180.042	6.213	C9 H8 O4	179.035	180.042	[M-H]	0.662618	1.08997	9.11848	3.93281	1.53741	0.229106	0.166797	1.14117
938	4-Hydroxyphenylpyruvic acid	-2.51	16.4		180.042	6.312	C9 H8 O4	179.035	180.042	[M-H]	1.82832	0.783184	8.26084	1.22251	0.910937	0.614037	0.634522	0.563157
249	4-methyl-2-oxopentanoic acid	-7	33.3		130.063	3.544	C6 H10 O3	129.055	130.062	[M-H]	15.0079	9.6843	5.46167	19.8224	13.7174	12.6744	14.6964	16.1012
251	4-methyl-2-oxopentanoic acid	-6.75	36		130.063	3.862	C6 H10 O3	129.055	130.062	[M-H]	14.1977	121.83	4.8607	13.8269	18.3927	5.69122	5.03998	2.74001
99	4-Methylphenol	-9.62	99	C01468	108.058	5.959	C7 H8 O	107.049	108.056	[M-H]	0.921959	0.29847	3.94327	0.137834	4.54769	0.141796	0.0631754	0.205184
101	4-Methylphenol	-9.58	98.4	C01468	108.058	5.737	C7 H8 O	107.049	108.056	[M-H]	1.74775	0.348671	2.43872	0.041839	9.25508	0.141796	0.150893	0.37876
239	4-Oxoproline	-7.44	98.8	C01877	129.043	1.297	C5 H7 N O3	128.034	129.042	[M-H]	3.9391	43.0705	7.4134	283.118	7.65602	4.05021	3.35586	5.51166
240	4-Oxoproline	-7.2	98.9	C01877	129.043	0.881	C5 H7 N O3	128.034	129.042	[M-H]	5.46036	50.3561	8.56369	307.419	8.10601	4.99905	4.35388	6.4835
1006	4-Pyridoxic acid	-2.32	28.8		183.053	3.787	C8 H9 N O4	182.045	183.053	[M-H]	0.457122	2.22243	0.310536	1.24447	0.358959	0.419194	0.376201	0.177099
328	4-Toluic acid	-6.68	57.3	C01454	136.052	4.159	C8 H8 O2	135.044	136.052	[M-H]	45.2981	4.23867	3.67273	3.50177	3.40647	1.54942	1.48424	1.81756
168	4-Vinylphenol	-8.38	79.7		120.058	4.71	C8 H8 O	119.049	120.057	[M-H]	0.690472	0.584075	2.26113	2.1074	0.595073	0.481138	1.03838	0.892012
169	4-Vinylphenol	-8.3	75.3		120.058	4.937	C8 H8 O	119.049	120.057	[M-H]	5.08795	9.97231	3.49401	6.745	2.18699	0.390115	0.778561	0.735386
170	4-Vinylphenol	-8.25	82.1		120.058	4.808	C8 H8 O	119.049	120.057	[M-H]	7.1566	0.742305	7.54859	2.1074	0.905177	0.181168	1.03838	12.2654
1130	5-Hydroxyindole-3-acetic acid	-1.65	77.2	C05635	191.058	4.513	C10 H9 N O3	190.051	191.058	[M-H]	1.96572	0.825045	1.13811	5.94029	0.504691	0.254123	0.578663	6.16075
1131	5-Hydroxyindole-3-acetic acid	-1.44	25		191.058	4.882	C10 H9 N O3	190.051	191.058	[M-H]	7.21994	14.1303	10.9612	13.7695	2.86104	1.09748	1.91555	1.48306
675	6-DEOXY-L-GALACTOSE	-3.59	30.3		164.068	0.804	C6 H12 O5	163.061	164.068	[M-H]	0.247646	0.667148	0.162794	5.41535	0.21643	0.272081	0.253143	0.267164
281	6-Hydroxycaproic acid	-6.73	98.5	C06103	132.079	4.437	C6 H12 O3	131.07	132.078	[M-H]	32.5659	43.5501	17.2489	72.3201	31.9929	8.00214	10.094	19.3365
2058	6-Hydroxymelatonin	1.07	44.5	C05643	248.116	6.998	C13 H16 N2 O3	247.109	248.116	[M-H]	12.3445	0.0512229	1.77535	0.0810494	18.222	0.0702237	0.0538576	9.07295
2059	6-Hydroxymelatonin	1.29	44.5	C05643	248.116	7.123	C13 H16 N2 O3	247.109	248.116	[M-H]	11.0979	0.0477581	2.32217	0.0756531	13.3575	0.0887852	0.0550249	7.2917
723	7-Methylxanthine	-11.9	53.9	C16353	166.049	0.818	C6 H6 N4 O2	165.04	166.047	[M-H]	4.73625	9.04649	2.95792	38.4864	1.90801	5.78951	3.31716	8.49506
3030	8Z,11Z,14Z-Eicosatrienoic acid	2.27	78	C03242	306.256	13.388	C20 H34 O2	305.249	306.257	[M-H]	0.255053	0.347982	0.478181	0.294412	0.983283	0.311325	0.307793	0.257841
2300	9-(2,3-dihydroxypropoxy)-9-oxononanoic acid	2.05	84.1		262.142	5.091	C12 H22 O6	261.135	262.142	[M-H]	3.42579	3.91675	1.02841	0.979085	3.09022	0.802974	1.67603	1.69395
2849	9-HODE	1.69	97.3		296.235	10.557	C18 H32 O3	295.228	296.236	[M-H]	4.95342	5.08322	12.7544	5.52046	54.838	8.99386	5.04723	49.7871
3134	9-HpODE	1.94	35.6		312.23	8.538	C18 H32 O4	311.223	312.231	[M-H]	20.9747	49.9864	74.1637	19.9161	31.0229	26.6316	9.12972	28.0655
3138	9-HpODE	2.21	73.6		312.23	8.288	C18 H32 O4	311.223	312.231	[M-H]	15.533	57.7876	79.522	4.27138	11.8672	32.7686	39.7243	13.9326
3139	9-HpODE	2.26	73.3		312.23	8.025	C18 H32 O4	311.223	312.231	[M-H]	27.1565	54.0451	64.7508	27.379	24.5233	29.5097	35.7539	27.156
1753	9-methoxycarbonyldec-9-enoic acid	0.31	24.2		228.136	4.657	C12 H20 O4	227.129	228.136	[M-H]	2.29441	1.09746	0.866095	5.46598	1.00707	0.470765	0.691949	0.796869
1755	9-methoxycarbonyldec-9-enoic acid	0.37	19.6		228.136	4.182	C12 H20 O4	227.129	228.136	[M-H]	0.694578	1.25542	1.31252	1.98857	0.474043	1.30949	1.32655	1.25518
2966	Abietic acid	1.65	84.8		302.225	12.336	C20 H30 O2	301.218	302.225	[M-H]	3.31935	1.35005	4.68152	4.90561	17.6126	3.03501	1.2534	1.27895
1	Acrylic acid	-17.47	99.9	C00511	72.0211	0.801	C3 H4 O2	71.0126	72.0199	[M-H]	0.523852	8.10857	0.625487	22.1655	0.755408	0.711492	0.615085	0.625543
3394	Aflatoxin G1	2.19	42.7	C16755	328.058	8.64	C17 H12 O7	327.052	328.059	[M-H]	8.39469	1.03407	0.223833	0.138458	5.91692	6.92258	1.25195	0.269069
1872	Ala-Phe	0.51	69.3		236.116	7.158	C12 H16 N2 O3	235.109	236.116	[M-H]	273.592	0.943776	98.17	0.509674	160.478	1.22212	2.367	91.1676
2997	Aleuretic Acid	2.12	87.3		304.225	6.335	C16 H32 O5	303.218	304.226	[M-H]	1.13648	7.487	0.703624	6.1709	0.155428	0.13016	1.78057	0.16433
584	Allantoin	-4.26	61.6		158.044	0.838	C4 H6 N4 O3	157.036	158.043	[M-H]	0.889083	17.6015	12.8845	1.99741	0.638966	0.405803	0.444888	0.224505
1196	alpha-Hydroxyhippuric acid	-1.64	35.1		195.053	3.915	C9 H9 N O4	194.046	195.053	[M-H]	7.2677	11.681	5.48983	51.8825	1.63803	0.460449	2.28125	1.26698
2526	alpha-Linolenic acid	1.61	95.1		278.225	12.446	C18 H30 O2	277.218	278.225	[M-H]	6.57865	9.25055	22.2608	4.93889	6.46965	8.36332	12.8952	8.53318
2527	alpha-Linolenic acid	1.63	92.6		278.225	12.702	C18 H30 O2	277.218	278.225	[M-H]	0.938422	0.375815	0.680085	0.173601	4.04728	2.50389	1.08367	4.54701
344	Anthranilic acid	-6.46	99	C00108	137.048	4.973	C7 H7 N O2	136.04	137.047	[M-H]	113.208	2.03864	189.244	2.00416	1.01702	0.706407	1.77953	2.63371
349	Anthranilic acid	-6.25	96.1	C00108	137.048	4.849	C7 H7 N O2	136.04	137.047	[M-H]	7.52598	2.03864	11.988	2.00416	0.382623	0.706407	0.615375	0.85979
3141	Arachidic acid	1.98	97	C06425	312.303	12.756	C20 H40 O2	311.296	312.303	[M-H]	1.44905	1.92646	2.44434	1.95801	0.372153	0.568686	0.987593	1.47619
1075	Azelaic acid	-2.02	98	C08261	188.105	5.452	C9 H16 O4	187.097	188.104	[M-H]	304.688	110.836	27.5828	66.577	81.0312	16.2223	33.0001	31.6647
183	Benzoic acid	-8.05	93.8	C00180	122.037	4.618	C7 H6 O2	121.029	122.036	[M-H]	81.5832	53.6644	120.924	82.0747	93.8331	30.3052	37.9961	70.6367
184	Benzoic acid	-7.81	64.2	C00180	122.037	4.365	C7 H6 O2	121.029	122.036	[M-H]	16.0145	8.46057	9.35745	13.4917	15.9201	10.1741	8.66682	13.3301
2015	beta-Hydroxymyristic acid	0.92	22.7		244.204	8.921	C14 H28 O3	243.197	244.204	[M-H]	3.87209	1.50907	2.10313	0.920256	3.24212	5.02757	3.00955	5.63557
266	Beta-Leucine	-7.02	35.4	C02486	131.095	1.476	C6 H13 N O2	130.086	131.094	[M-H]	2.46506	1.93635	2.09423	4.31774	1.90877	1.35409	1.16432	1.22112
1330	Capryloylglycine	-1.16	63.9		201.136	4.221	C10 H19 N O3	200.129	201.136	[M-H]	0.171291	0.017844	3.92333	0.0208205	0.068595	0.0355883	0.0168069	0.423964
244	Citraconic acid	-7.86	23.3		130.027	1.298	C5 H6 O4	129.018	130.026	[M-H]	2.2403	1.70578	1.37173	7.18084	2.14908	0.663162	0.658797	1.04092
246	Citraconic acid	-7.03	35.1	C01732	130.027	1.006	C5 H6 O4	129.018	130.026	[M-H]	2.36902	2.0183	2.2653	4.99152	3.00759	0.810928	0.933952	0.80487
466	Citramalic acid	-5.41	65.2		148.037	1.483	C5 H8 O5	147.029	148.036	[M-H]	2.2947	2.25449	1.99132	3.14868	1.92911	2.33876	2.54327	3.0481
1136	Citric acid	-1.8	44.6	C00158	192.027	1.3	C6 H8 O7	191.019	192.027	[M-H]	12.8636	3.56538	6.53609	111.377	6.09195	6.08912	4.9441	12.446
1137	Citric acid	-1.79	93.6	C00158	192.027	0.875	C6 H8 O7	191.019	192.027	[M-H]	10.6204	2.13784	5.04471	74.666	2.02937	4.62576	2.53938	9.62357
1989	Cytidine	8.15	42.8	C00475	243.086	0.784	C9 H13 N3 O5	242.08	243.088	[M-H]	3.68041	3.09172	4.0256	4.8522	11.3914	2.8303	2.86548	2.85309
467	D-2-Hydroxyglutaric acid	-5.39	59.4	C01087	148.037	1.298	C5 H8 O5	147.029	148.036	[M-H]	1.52749	0.82369	1.71981	19.491	7.92929	0.34883	2.54327	0.596658
468	D-2-Hydroxyglutaric acid	-5.24	53.5	C01087	148.037	0.873	C5 H8 O5	147.029	148.036	[M-H]	3.05714	2.31297	2.7906	26.9031	8.80536	1.23924	1.43536	1.7405
940	D-Fructose	-2.55	69.4	C02336	180.063	0.804	C6 H12 O6	179.056	180.063	[M-H]	6.61231	98.8575	3.84463	298.184	4.01143	6.34332	4.25411	10.5913
435	D-Glutamine	-5.12	61.2		146.069	0.777	C5 H10 N2 O3	145.061	146.068	[M-H]	2.00099	1.74127	2.29239	3.20539	6.32759	1.76524	1.54391	1.92745
1518	Dihydrojasmonic Acid	-0.47	45.9		212.141	6.684	C12 H20 O3	211.134	212.141	[M-H]	13.3832	5.14287	7.44416	6.22537	15.6621	7.789	8.24331	8.38065
1016	DIHYDROXYMANDELIC ACID	-2.43	59.3		184.037	2.921	C8 H8 O5	183.029	184.037	[M-H]	0.124688	0.499281	4.52991	0.117257	0.0579885	0.0383016	0.0411008	0.0382989
501	DL-Mandelic acid	-5.76	77		152.047	0.88	C8 H8 O3	151.039	152.046	[M-H]	4.34492	7.67174	3.40006	2.97165	3.4547	4.45094	4.27469	3.1822
505	DL-Mandelic acid	-4.93	80.7		152.047	1.424	C8 H8 O3	151.039	152.047	[M-H]	6.71253	3.50965	1.90488	3.5841	3.19757	3.84732	3.74005	3.34486
3409	Docosahexaenoic Acid	1.82	87.2		328.24	12.736	C22 H32 O2	327.234	328.241	[M-H]	2.04258	1.73322	2.60971	2.42895	8.2825	2.71226	1.86734	2.26171
3473	Docosatetraenoic acid	1.65	60		332.272	13.682	C22 H36 O2	331.265	332.272	[M-H]	0.131941	0.0872314	0.166942	0.16069	0.962016	0.174858	0.0876214	0.0824008
1792	Dodecanedioic acid	0.49	67.9	C02678	230.152	5.801	C12 H22 O4	229.145	230.152	[M-H]	3.22647	3.20566	2.8199	12.5088	2.91496	2.68394	2.1647	3.48536
283	D-ORNITHINE	-6.74	18.8		132.09	0.689	C5 H12 N2 O2	131.082	132.089	[M-H]	0.218753	0.122334	0.328968	2.15337	0.481673	0.175361	0.116128	0.1425
1145	D-Quinic acid	-1.97	43	C00296	192.063	0.844	C7 H12 O6	191.056	192.063	[M-H]	1.29876	1.23169	2.09933	12.0381	1.17898	1.10346	1.57004	2.08446
485	D-RIBOSE	-5.28	37.6		150.053	0.818	C5 H10 O5	149.045	150.052	[M-H]	0.778883	1.83388	1.46055	11.246	1.55423	0.854848	0.608763	1.45773
1786	D-ribose 5-phosphate	0.31	71.7		230.019	5.082	C5 H11 O8 P	229.012	230.019	[M-H]	0.0221623	0.0218074	0.0217747	9.09495	0.0335339	0.021228	0.022113	0.0209089
2662	D-Salicin	2.23	38.1	C01451	286.105	4.533	C13 H18 O7	285.099	286.106	[M-H]	0.0677862	0.0162335	0.0243826	0.0185645	1.26533	11.1123	20.1743	0.0503768
3065	Eicosadienoic acid	1.62	96.5		308.272	14.166	C20 H36 O2	307.265	308.272	[M-H]	1.49604	0.87247	2.16264	1.66764	5.52482	1.15866	0.616602	0.844009
3066	Eicosadienoic acid	1.97	84.2		308.272	14.396	C20 H36 O2	307.265	308.272	[M-H]	0.630033	0.564108	0.395506	0.339959	1.64827	0.386214	0.367033	0.271469
1896	ethyl 2-(2-acetyl-3,5-dihydroxyphenyl)acetate	0.83	64.2		238.084	5.564	C12 H14 O5	237.077	238.084	[M-H]	0.36238	1.1137	5.73192	0.84628	0.0539095	0.193418	0.284819	0.639827
1694	FA 13:3+1O	0.01	59		224.141	8.357	C13 H20 O3	223.134	224.141	[M-H]	8.65634	2.13492	20.6962	2.46657	12.0713	12.1975	20.7586	105.805
2131	FA 16:2	1.22	89.8		252.209	12.098	C16 H28 O2	251.202	252.209	[M-H]	0.93133	0.519575	0.761542	0.21991	0.974912	2.63897	2.29219	1.48461
2415	FA 17:0	1.49	91.5		270.256	14.194	C17 H34 O2	269.249	270.256	[M-H]	1.30042	1.87784	1.48139	1.03346	1.3373	0.684095	1.26631	1.27914
2416	FA 17:0	1.57	87.3		270.256	14.449	C17 H34 O2	269.249	270.256	[M-H]	2.37563	2.17092	2.77396	2.57769	3.27848	1.83713	1.85856	2.40634
3443	FA 18:1+3O	2.05	89.4		330.241	7.059	C18 H34 O5	329.234	330.241	[M-H]	38.5872	44.837	40.701	276.565	30.3836	21.6413	49.6554	28.7867
3135	FA 18:2+2O	1.96	36.2		312.23	10.874	C18 H32 O4	311.223	312.231	[M-H]	14.8121	3.69725	12.1951	2.08521	8.37168	5.62244	2.35527	12.2465
3403	FA 18:2+3O	1.94	67.6		328.225	6.609	C18 H32 O5	327.218	328.226	[M-H]	8.589	30.7629	88.932	48.8093	15.3354	5.93467	9.56273	10.4252
3618	FA 18:2+4O	1.8	75.8		344.22	5.733	C18 H32 O6	343.213	344.221	[M-H]	7.19724	8.74308	8.44819	43.6514	9.17444	2.41249	4.01528	4.61826
3619	FA 18:2+4O	1.86	69.7		344.22	5.94	C18 H32 O6	343.213	344.221	[M-H]	7.7169	23.4752	29.3481	19.4326	6.24416	1.66422	2.08359	4.00078
3620	FA 18:2+4O	1.87	74		344.22	5.507	C18 H32 O6	343.213	344.221	[M-H]	9.17911	13.7578	4.8487	43.6514	4.65239	1.21091	2.01524	2.2929
3094	FA 18:3+2O	2.43	73.3		310.214	7.548	C18 H30 O4	309.208	310.215	[M-H]	3.59803	26.8346	8.7903	4.35381	1.32585	3.79219	3.65708	3.88096
3091	FA 18:4+2O	2.03	71.1		310.214	9.794	C18 H30 O4	309.208	310.215	[M-H]	1.53364	4.62049	20.5651	2.33052	2.30782	2.85125	3.52158	3.45219
3445	FA 22:5	1.83	80.4		330.256	13.067	C22 H34 O2	329.249	330.256	[M-H]	0.16295	0.102458	0.177316	0.171978	0.792374	0.125453	0.0873442	0.128399
850	FA 9:0+1O	-2.72	80.3		174.126	5.571	C9 H18 O3	173.118	174.125	[M-H]	2.09457	2.03259	3.58494	2.92661	1.94343	3.55923	6.71202	1.69316
851	FA 9:0+1O	-2.7	82.6		174.126	5.992	C9 H18 O3	173.118	174.125	[M-H]	7.79013	1.19626	219.115	1.49463	5.86996	1.44553	2.46154	10.6668
823	FA 9:1+1O	-3	49.3		172.11	6.1	C9 H16 O3	171.102	172.109	[M-H]	42.677	70.5181	18.5842	35.7113	40.2352	33.7657	135.518	19.9378
824	FA 9:1+1O	-2.9	48.1		172.11	6.333	C9 H16 O3	171.102	172.109	[M-H]	41.0441	25.5774	8.61994	19.6015	26.482	21.0154	7.7128	12.8454
3641	Gibberellic acid	11.46	31.7	C01699	346.142	11.804	C19 H22 O6	345.138	346.146	[M-H]	2.11143	0.641924	0.916033	0.163895	1.57019	0.206365	0.0777336	13.312
1213	Gluconic acid	-1.79	29.1		196.058	0.812	C6 H12 O7	195.051	196.058	[M-H]	0.820214	1.33702	0.816845	12.1223	1.70987	0.694614	0.615676	0.931602
276	Glutaric acid	-6.61	98.4	C00489	132.042	2.346	C5 H8 O4	131.034	132.041	[M-H]	4.22185	2.12976	2.46325	25.8618	1.85748	2.71758	2.39512	2.91554
816	Glycerol 3-phosphate	-3.16	43.5	C03189	172.014	0.841	C3 H9 O6 P	171.006	172.013	[M-H]	37.5506	31.834	39.8482	37.2578	48.9228	31.7336	32.1136	32.4208
3	Glycolic acid	-16.05	100	C00160	76.016	1.229	C2 H4 O3	75.0075	76.0148	[M-H]	9.65969	16.3533	5.55557	5.11963	13.0983	10.6877	10.0196	13.465
2607	Guanosine	2.33	31.1	C00387	283.092	1.645	C10 H13 N5 O5	282.085	283.092	[M-H]	0.0314239	0.0396277	0.0839313	3.24077	0.0316543	0.029367	0.0286779	0.02865
973	Hydroxyphenyllactic acid	-2.43	75.8	C03672	182.058	5.801	C9 H10 O4	181.05	182.057	[M-H]	53.6653	0.950252	13.0268	1.21108	0.892261	46.5586	65.6505	9.42292
86	HYDROXYPYRUVATE	-10.17	54.3		104.011	0.974	C3 H4 O4	103.003	104.01	[M-H]	1.72011	1.9953	1.18552	4.70991	0.690407	0.732018	0.574129	1.06671
1617	Hydroxysebacic acid	-0.04	66		218.115	4.911	C10 H18 O5	217.108	218.115	[M-H]	0.517793	0.76344	0.307988	3.26543	0.356671	0.157919	0.242158	0.277361
1118	Hydroxysuberic acid	-1.95	42.3		190.084	3.566	C8 H14 O5	189.076	190.084	[M-H]	0.685473	0.50806	0.155483	10.0242	0.226928	0.136079	0.121707	0.230421
324	Hypoxanthine	-6.46	98.2	C00262	136.039	1.297	C5 H4 N4 O	135.03	136.038	[M-H]	1.92235	0.362449	3.1292	2.36743	12.9672	0.231224	0.103528	0.420435
325	Hypoxanthine	-6.45	91.5	C00262	136.039	0.864	C5 H4 N4 O	135.03	136.038	[M-H]	2.10409	0.323766	4.06692	1.52638	15.2801	0.153442	0.0376975	0.342681
218	Imidazoleacetic acid	-7.44	74.7	C02835	126.043	1.735	C5 H6 N2 O2	125.035	126.042	[M-H]	55.5871	26.5161	53.7493	11.6339	61.3438	60.6512	72.1506	34.3014
143	Indole	-8.36	43.8		117.058	5.374	C8 H7 N	116.05	117.057	[M-H]	3.36901	2.59692	6.15458	0.35425	0.57665	1.09581	2.25623	3.41572
618	Indole-2-carboxylic acid	-3.89	95.3		161.048	5.373	C9 H7 N O2	160.04	161.047	[M-H]	17.9217	14.7145	29.4626	1.74028	3.20529	6.48806	12.6435	17.79
857	Indole-3-acetic acid	-3.32	47.1	C00954	175.063	5.767	C10 H9 N O2	174.055	175.063	[M-H]	150.028	3.8637	134.909	18.1751	19.537	24.7588	72.0936	476.188
2992	Indole-3-acetyl-L-glutamic acid	-5.8	14.8		304.106	7.156	C15 H16 N2 O5	303.097	304.104	[M-H]	18.8299	0.0554634	7.09137	0.0792978	8.5446	0.0797203	0.0714632	6.3949
2481	Indole-3-acetyl-L-valine	2.84	12.2		274.132	6.112	C15 H18 N2 O3	273.125	274.133	[M-H]	1.01685	1.32616	0.961038	4.1245	0.279836	0.101463	0.35499	0.261888
1387	Indolelactic acid	-0.91	93.2	C02043	205.074	4.501	C11 H11 N O3	204.066	205.074	[M-H]	3.13087	3.00456	1.98473	0.388348	1.26694	1.97448	2.3908	0.381468
1290	IS_2-CHLORO-PHENYLALANINE	-1.59	90.4		199.04	3.312	C9 H10 Cl N O2	198.032	199.04	[M-H]	0	0	0	0	0	0	0	0
268	Isoleucine	-6.95	28.3		131.095	3.726	C6 H13 N O2	130.086	131.094	[M-H]	0.633469	0.681989	0.693917	1.77528	0.761755	0.651397	0.67284	0.705295
247	Itaconic acid	-6.92	39.9	C00490	130.027	2.739	C5 H6 O4	129.018	130.026	[M-H]	7.22716	2.79365	2.0597	7.03075	2.23805	2.00506	2.11215	2.15292
285	L-Aspartic acid	-6.6	46.3	C00049	133.038	0.787	C4 H7 N O4	132.029	133.037	[M-H]	2.28837	3.93836	2.12362	9.44133	6.63464	1.86015	3.37716	2.57137
1321	Lauric acid	-5.4	59	C02679	200.178	7.933	C12 H24 O2	199.169	200.177	[M-H]	19.2638	19.3665	19.3458	18.3386	6.05158	11.3869	12.5301	10.6031
1322	Lauric acid	-3.69	49.9	C02679	200.178	8.051	C12 H24 O2	199.17	200.177	[M-H]	3.06163	10.7998	2.70001	13.6598	1.53459	10.3578	2.83666	1.84215
267	Leucine	-6.95	75.8		131.095	4.564	C6 H13 N O2	130.086	131.094	[M-H]	0.860599	0.322487	0.277257	1.6894	0.282823	0.243371	0.259168	0.206417
443	L-Glutamic acid	-5.08	32.6	C00025	147.053	0.793	C5 H9 N O4	146.045	147.052	[M-H]	4.47515	5.56977	5.20072	7.81542	25.6245	1.86952	1.60859	2.18928
2566	Linoleic acid	1.25	97.2	C01595	280.24	13.097	C18 H32 O2	279.233	280.241	[M-H]	43.9392	25.0545	41.6526	15.7748	49.6326	44.7558	41.1675	53.1391
2567	Linoleic acid	1.65	70.6		280.24	13.336	C18 H32 O2	279.233	280.241	[M-H]	1.52459	1.65722	1.6993	1.13582	1.5919	1.29829	1.40449	1.57046
22	L-Lactic acid	-13.03	98	C00186	90.0317	0.889	C3 H6 O3	89.0232	90.0305	[M-H]	188.351	101.798	58.9085	171.63	102.274	82.8357	186.787	63.8803
23	L-Lactic acid	-12.83	99.1	C00186	90.0317	1.296	C3 H6 O3	89.0233	90.0305	[M-H]	86.6924	84.2278	90.0447	91.9895	74.483	64.0242	83.3003	66.8226
2279	Lotaustralin	1.61	29.1		261.121	3.948	C11 H19 N O6	260.114	261.122	[M-H]	0.0268761	0.0179042	0.0218305	0.0229603	0.165762	1.82805	1.02451	0.0451963
687	L-Phenylalanine	-3.8	37.1	C00079	165.079	4.5	C9 H11 N O2	164.071	165.078	[M-H]	1.40321	0.979143	0.311598	9.4897	0.419366	0.138854	0.220987	0.19955
1370	L-Tryptophan	-1.22	95.2	C00806	204.09	3.274	C11 H12 N2 O2	203.082	204.09	[M-H]	1.06274	1.4943	1.41096	6.52509	4.13189	0.393328	0.232154	0.540395
1197	L-Tyrosine methyl ester	-1.78	34.7	C03404	195.09	3.483	C10 H13 N O3	194.082	195.089	[M-H]	98.9895	1.38379	59.1786	22.0918	17.5703	11.8182	12.0349	0.833713
3708	LysoPA(i-12:0/0:0)	2	92.8		354.181	9.557	C15 H31 O7 P	353.174	354.181	[M-H]	148.151	140.992	149.637	135.43	121.363	128.178	142.561	142.882
4292	LysoPE(14:0/0:0)	2.53	21.8		425.254	8.018	C19 H40 N O7 P	424.248	425.255	[M-H]	131.01	122.867	125.363	119.895	113.597	116.882	126.653	118.613
978	Mannitol	-2.43	39.5		182.079	8.252	C6 H14 O6	181.071	182.079	[M-H]	0.533482	0.493057	1.34414	0.578143	0.691236	0.539158	0.500733	8.06941
1103	Methyl indole-3-acetate	-1.91	31.9	C20635	189.079	5.408	C11 H11 N O2	188.071	189.079	[M-H]	3.30817	0.300728	0.551163	0.114307	1.41016	2.1191	6.74038	1.79532
1104	Methyl indole-3-acetate	-1.86	26.7		189.079	5.076	C11 H11 N O2	188.071	189.079	[M-H]	1.35121	1.89512	2.06727	1.70318	1.9049	1.51309	1.74157	1.96805
2	Methylacetate	-16.38	79.9		74.0368	1.547	C3 H6 O2	73.0283	74.0356	[M-H]	1.08211	0.917388	0.276383	13.3923	0.882587	0.109959	0.441478	0.238907
154	Methylmalonic acid	-8.37	93.4	C02170	118.027	1.001	C4 H6 O4	117.018	118.026	[M-H]	4.56729	6.71023	5.07338	67.0067	4.79767	3.51975	3.63257	4.69275
155	Methylmalonic acid	-8.27	90.7	C02170	118.027	1.335	C4 H6 O4	117.018	118.026	[M-H]	1.91951	1.68841	0.937054	21.1153	1.37313	0.554286	0.668247	0.745821
275	Methylsuccinic acid	-6.7	98.1		132.042	2.89	C5 H8 O4	131.034	132.041	[M-H]	4.0246	2.78686	3.66834	17.7092	1.6753	1.7594	1.49788	1.8404
470	Mevalonic acid	-5.35	32.3		148.074	2.451	C6 H12 O4	147.065	148.073	[M-H]	3.19743	1.36209	0.819726	32.2864	1.5742	0.716367	0.604943	2.21182
1657	Monobutyl phthalate	0.03	38.2		222.089	7.699	C12 H14 O4	221.082	222.089	[M-H]	8.69848	8.9075	5.24768	12.8114	9.73592	4.13144	6.30351	4.02296
3854	Murolic acid	1.41	47.7		368.256	9.609	C21 H36 O5	367.25	368.257	[M-H]	3.82611	0.764867	3.7185	0.448256	0.836341	0.452917	0.145579	23.6778
1759	Myristic acid	-0.27	89.9	C06424	228.209	12.605	C14 H28 O2	227.202	228.209	[M-H]	2.76718	3.25579	3.53051	2.39864	2.22025	1.60241	2.22953	2.55687
262	N-Acetylalanine	-7.23	38.9		131.058	1.517	C5 H9 N O3	130.05	131.057	[M-H]	0.848132	0.926764	0.912253	3.6878	0.601644	0.502071	0.44936	0.65953
263	N-Acetylalanine	-7.12	31.2		131.058	1.33	C5 H9 N O3	130.05	131.057	[M-H]	0.848132	0.926764	0.912253	1.2976	0.601644	0.169716	0.218846	0.65953
913	N-Acetylanthranilic acid	-2.68	95.8	C06332	179.058	5.28	C9 H9 N O3	178.05	179.058	[M-H]	64.5592	1.94143	40.1751	46.0717	1.23288	0.680082	1.67633	1.96072
839	N-Acetyl-D-alloisoleucine	-3	56		173.105	4.566	C8 H15 N O3	172.097	173.105	[M-H]	4.02322	0.53792	0.464882	17.6885	1.04383	0.256164	0.485263	0.322538
840	N-Acetyl-D-alloisoleucine	-2.83	48.9		173.105	4.231	C8 H15 N O3	172.097	173.105	[M-H]	0.124744	0.0721496	0.0396481	3.53069	0.0736293	0.0564262	0.0680724	0.114071
841	N-Acetyl-D-alloisoleucine	-2.74	56.7		173.105	4.409	C8 H15 N O3	172.097	173.105	[M-H]	2.02509	0.798759	0.40266	12.4914	0.453705	0.153272	0.265739	0.26392
603	N-Acetyl-DL-norvaline	-4.15	60.8		159.09	2.807	C7 H13 N O3	158.082	159.089	[M-H]	9.7687	1.7284	1.92848	58.1576	0.893612	0.753723	0.855645	0.893723
142	N-ACETYLGLYCINE	-9.39	77		117.043	8.691	C4 H7 N O3	116.034	117.041	[M-H]	4.15296	1.19747	1.30654	1.20826	1.29119	1.10243	1.01741	4.87888
1670	N-Acetyl-L-tyrosine	0.01	82.6		223.084	3.538	C11 H13 N O4	222.077	223.084	[M-H]	0.879691	0.886795	0.868819	7.67524	0.418633	0.199138	0.326991	0.297038
3073	N-ACETYLNEURAMINATE	1.94	12.2		309.106	0.874	C11 H19 N O9	308.099	309.107	[M-H]	0.589527	0.986633	0.0882484	8.39358	0.118093	0.254391	0.0887007	0.0587243
1421	N-Acetylphenylalanine	-0.77	28		207.09	4.744	C11 H13 N O3	206.082	207.089	[M-H]	0.431482	0.605981	0.200468	6.11496	1.29037	0.0710285	0.224739	0.210916
1424	N-Acetylphenylalanine	-0.61	26.3		207.09	4.99	C11 H13 N O3	206.082	207.089	[M-H]	2.67471	0.346403	0.503269	2.02085	4.67413	0.236253	0.276349	0.241939
2036	N-Acetyltryptophan	1.24	59		246.1	5.103	C13 H14 N2 O3	245.093	246.101	[M-H]	15.0715	4.05824	3.31371	44.3475	3.35161	1.11694	2.91017	1.01964
915	N-acetyltyramine	-2.84	82		179.095	4.712	C10 H13 N O2	178.087	179.094	[M-H]	21.532	12.2626	60.1521	25.0663	18.5682	11.9796	22.6614	26.4669
602	N-Acetylvaline	-4.17	42.5		159.09	3.54	C7 H13 N O3	158.082	159.089	[M-H]	1.43326	1.15537	1.05591	4.44774	0.897185	0.56364	0.577675	1.09156
188	Nicotinic acid	-7.46	40.6		123.032	0.943	C6 H5 N O2	122.024	123.031	[M-H]	3.09947	2.15653	3.17825	5.33713	4.38364	4.12066	2.45918	4.00988
269	Norleucine	-6.85	79.7		131.095	1.36	C6 H13 N O2	130.086	131.094	[M-H]	0.972225	0.836819	1.06573	2.01601	1.05856	1.35409	1.16432	0.72111
145	NORVALINE	-8.09	87.8		117.079	3.112	C5 H11 N O2	116.071	117.078	[M-H]	0.527238	2.15133	0.441863	2.33072	0.521611	0.390931	0.43988	0.423951
2598	Oleic acid	1.15	96.9		282.256	13.93	C18 H34 O2	281.249	282.256	[M-H]	29.5195	35.5865	50.5203	22.376	47.5221	25.4464	24.529	37.3893
2599	Oleic acid	1.42	97		282.256	14.071	C18 H34 O2	281.249	282.256	[M-H]	5.70774	5.97606	5.9361	5.03753	13.8797	5.36265	5.2315	6.36909
2695	Orotidine	16.18	31.5		288.059	5.665	C10 H12 N2 O8	287.057	288.064	[M-H]	1.59176	0.0800927	0.934593	1.82983	0.807197	1.28414	2.89076	1.78707
2183	Palmitic acid	0.99	97.4	C00249	256.24	13.733	C16 H32 O2	255.233	256.24	[M-H]	44.5992	39.1938	48.407	44.1189	33.7998	32.2617	34.0259	38.7581
2154	Palmitoleic acid	1.22	94.4	C08362	254.225	12.939	C16 H30 O2	253.218	254.225	[M-H]	3.03379	6.01727	3.5915	1.98283	2.05157	1.30118	4.30382	2.79229
2155	Palmitoleic acid	1.36	97	C08362	254.225	12.835	C16 H30 O2	253.218	254.225	[M-H]	3.85613	3.40726	5.05408	2.26359	6.83117	5.78829	4.84368	4.88435
1620	Pantothenic acid	-0.18	49.6	C00864	219.111	2.888	C9 H17 N O5	218.103	219.111	[M-H]	7.15192	1.54981	0.976169	30.4015	2.08869	0.55211	0.291942	1.00068
1984	Pentadecanoic acid	0.71	92.9	C16537	242.225	13.168	C15 H30 O2	241.217	242.225	[M-H]	1.03391	1.1123	0.931164	0.719216	0.890442	0.447681	0.714862	0.889925
40	Phenol	-12.73	98	C00146	94.0419	4.079	C6 H6 O	93.0334	94.0407	[M-H]	5.36247	0.16617	1.43024	0.556766	1.31353	0.694264	1.05367	0.613337
42	Phenol	-12.17	98.9	C00146	94.0419	3.943	C6 H6 O	93.0334	94.0407	[M-H]	4.22694	0.515406	1.73225	1.23051	3.97947	1.00251	1.28421	1.06451
330	Phenylacetic acid	-6.41	62.3		136.052	5.764	C8 H8 O2	135.044	136.052	[M-H]	103.043	10.8578	85.1196	10.1692	18.4086	18.1964	58.3805	8.66655
333	Phenylacetic acid	-5.4	69.6		136.052	6.122	C8 H8 O2	135.044	136.052	[M-H]	49.0175	43.9159	49.62	43.3669	45.1827	43.8817	46.3802	46.4533
2111	Phenylacetylaspartic acid	1.39	24.7		251.079	3.887	C12 H13 N O5	250.072	251.08	[M-H]	0.415353	1.47771	1.80697	0.953793	0.948675	0.683136	1.07766	0.618403
1172	Phenylacetylglycine	-1.34	63.4	C05598	193.074	4.467	C10 H11 N O3	192.066	193.074	[M-H]	1.34503	0.143125	0.399278	0.314661	8.48147	0.117305	1.14338	0.330724
57	Phosphoric acid	0.72	93.4		97.9769	0.766	H3 O4 P	96.9697	97.977	[M-H]	0.57553	0.743323	1.05387	0.394032	0.073864	0.144256	0.472482	0.611703
719	Phthalic acid	-3.74	81.6		166.027	4.127	C8 H6 O4	165.019	166.026	[M-H]	90.0956	89.669	90.8364	60.6824	84.2063	83.4055	90.9865	66.536
2872	picein	2	12.4		298.105	5.044	C14 H18 O7	297.099	298.106	[M-H]	0.0248514	0.0427168	0.02769	2.42195	0.0255508	0.0235894	0.0244016	0.0227952
187	Picolinic acid	-7.85	88.1	C10164	123.032	1.296	C6 H5 N O2	122.024	123.031	[M-H]	3.91952	4.45821	2.48927	10.835	2.31134	1.47171	1.08797	3.58844
608	Pimelic acid	-4.18	90.7	C02656	160.074	4.035	C7 H12 O4	159.066	160.073	[M-H]	11.2846	8.56895	2.51486	70.0383	2.88369	1.35859	1.67917	2.84108
943	Propylparaben	-2.72	43.8	D01422	180.079	5.659	C10 H12 O3	179.071	180.078	[M-H]	0.610582	0.747977	0.661062	0.482411	0.669441	0.442046	0.479754	50.3408
2126	Punctaporonin B	1.37	27.4		252.173	8.74	C15 H24 O3	251.166	252.173	[M-H]	1.81062	1.33897	1.44017	1.23924	2.04692	103.767	235.12	6.3033
18	Pyruvic acid	-13.48	93.9	C00022	88.016	0.801	C3 H4 O3	87.0076	88.0149	[M-H]	8.08438	5.59792	2.71046	11.2365	2.65294	2.46856	2.70723	15.7119
19	Pyruvic acid	-12.97	96.4	C00022	88.016	0.97	C3 H4 O3	87.0076	88.0149	[M-H]	9.59884	10.288	18.909	10.1828	8.89921	6.42541	8.70682	15.7119
20	Pyruvic acid	-12.8	40.1	C00022	88.016	1.287	C3 H4 O3	87.0076	88.0149	[M-H]	78.3063	128.169	80.072	7.02069	8.52712	3.83754	75.4941	125.224
3519	rabelomycin	1.76	75.7		338.079	11.187	C19 H14 O6	337.072	338.08	[M-H]	20.3558	8.04858	2.39198	1.33869	0.902474	1.22256	0.502083	0.58331
3943	Riboflavin	1.79	13.8		376.138	5.034	C17 H20 N4 O6	375.132	376.139	[M-H]	0.331972	0.145835	0.24377	0.162519	0.485184	0.561601	0.659444	0.196797
364	Salicylic acid	-6.52	90.9	C00805	138.032	4.349	C7 H6 O3	137.024	138.031	[M-H]	4.67925	2.75837	1.51199	38.5587	4.52892	5.70704	3.2312	1.99245
366	Salicylic acid	-6.3	98	C00805	138.032	3.943	C7 H6 O3	137.024	138.031	[M-H]	123.038	16.8305	58.9738	38.7911	115.781	31.4645	42.5888	34.8291
264	Skatole	-7.36	22.8		131.073	5.767	C9 H9 N	130.065	131.073	[M-H]	91.3318	2.44135	88.5679	12.1047	12.1997	15.3136	44.9222	304.128
2637	Stearic acid	1.46	97.8		284.272	12.487	C18 H36 O2	283.265	284.272	[M-H]	94.0536	103.609	88.5578	106.021	25.9656	77.9342	78.4058	71.4924
847	Suberic acid	-2.78	97	C08278	174.089	4.757	C8 H14 O4	173.081	174.089	[M-H]	21.3166	19.0818	6.24702	40.9823	7.78759	4.90216	6.17606	6.74547
207	Taurine	-7.58	86	C00245	125.015	0.791	C2 H7 N O3 S	124.006	125.014	[M-H]	14.6662	6.31799	20.786	39.9526	95.8695	3.08581	2.7949	5.53857
1242	Tenuazonic Acid	-1.48	84		197.105	3.949	C10 H15 N O3	196.098	197.105	[M-H]	0.320973	0.290133	0.301881	0.406261	0.671596	0.934197	0.89037	0.351988
4074	Thaxtomin C	-0.89	34.2		392.148	4.506	C21 H20 N4 O4	391.141	392.148	[M-H]	0.750343	0.221047	2.97576	0.0200116	0.544867	1.7113	3.73623	0.0264948
165	Threonine	-8.33	39.4	C12317	119.058	0.789	C4 H9 N O3	118.05	119.057	[M-H]	1.90838	0.997041	2.22799	8.25548	7.22979	0.637232	0.505855	1.09783
371	Tyrosol	-6.48	96.6	C06044	138.068	6.123	C8 H10 O2	137.06	138.067	[M-H]	1.14351	0.418586	1.30346	0.27315	38.2828	379.543	626.188	1.63695
1573	Undecanedioic acid	-0.1	26.4		216.136	5.013	C11 H20 O4	215.129	216.136	[M-H]	7.94004	1.60577	0.980681	7.45966	0.924504	0.817528	0.996577	2.25628
115	Uracil	-9.52	99.6	C00106	112.027	0.868	C4 H4 N2 O2	111.019	112.026	[M-H]	361.778	45.0492	285.509	10.0195	74.0068	137.264	163.901	33.7115
116	Uracil	-9.43	97.5	C00106	112.027	1.295	C4 H4 N2 O2	111.019	112.026	[M-H]	171.808	23.3725	142.154	6.49077	41.3244	72.293	77.478	17.7615
2003	Uridine	0.9	49	C00299	244.07	0.871	C9 H12 N2 O6	243.062	244.07	[M-H]	0.942679	0.750892	1.68031	38.3495	2.93848	0.313192	0.319184	0.310022
2004	Uridine	1.11	52.9	C00299	244.07	1.317	C9 H12 N2 O6	243.063	244.07	[M-H]	0.279826	0.460435	0.79265	25.8208	1.0341	0.188598	0.195886	0.115878
368	Urocanic acid	-6.13	51.4	C00785	138.043	0.866	C6 H6 N2 O2	137.035	138.042	[M-H]	3.20425	4.1245	3.63938	4.96571	4.21796	2.88488	2.81435	3.28073
1540	Valylproline	-0.47	90.8		214.132	4.562	C10 H18 N2 O3	213.124	214.132	[M-H]	11.5977	0.0918415	0.594327	5.89718	5.41801	0.455867	0.427947	1.73549
1513	Volemitol	-0.67	91.8		212.09	0.796	C7 H16 O7	211.082	212.089	[M-H]	0.156519	0.220414	0.107046	100.734	0.0429297	0.19918	0.139087	0.154196
499	Xanthine	-5.35	90	C00385	152.033	0.866	C5 H4 N4 O2	151.025	152.033	[M-H]	130.838	2.84086	65.8643	5.47627	16.1288	4.2745	6.28463	1.29153
500	Xanthine	-5.2	90.1	C00385	152.033	1.297	C5 H4 N4 O2	151.025	152.033	[M-H]	126.693	2.99369	67.9433	5.60534	35.8112	4.75917	6.42759	1.43224
3272	zearalenol	-5.84	40.6		320.162	8.695	C18 H24 O5	319.153	320.161	[M-H]	0.0583325	0.0558145	0.0599652	0.070514	0.0653998	1.73204	8.57354	0.0797571
